# Supplementary material
Source: PubMed Central journal article supplement (PMC8126856)
Supplement: pnas.2022655118.sapp.pdf [file pnas.2022655118.sapp.pdf]

# PNAS

www.pnas.org

Supplementary Information for

## **Immune evasion in HPV-negative head and neck precancer-cancer transition is driven by an aneuploid switch involving chromosome 9p loss**

William N. William Jr;<sup>1,2\*#</sup> Xin Zhao;<sup>3\*</sup> Joy J. Bianchi;<sup>3\*</sup> Heather Y. Lin;<sup>4</sup> Pan Cheng;<sup>3</sup> J. Jack Lee;<sup>4</sup> Hannah Carter;<sup>5,6</sup> Ludmil B. Alexandrov;<sup>5,7,8</sup> Jim P. Abraham;<sup>9</sup> David B. Spetzler;<sup>9</sup> Steven M. Dubinett;<sup>10</sup> Don W. Cleveland;<sup>5,7,11</sup> Webster Cavenee;<sup>5,6,11</sup> Teresa Davoli;<sup>3\$#</sup> Scott M. Lippman<sup>1,5,6\$</sup>

Departments of <sup>1</sup>Thoracic / Head and Neck Medical Oncology, <sup>4</sup>Biostatistics, The University of Texas MD Anderson Cancer Center; <sup>2</sup>Hospital BP, a Beneficência Portuguesa de São Paulo; <sup>3</sup>Institute for Systems Genetics, Department of Biochemistry and Molecular Pharmacology, NYU Langone Health; <sup>5</sup>Moores Cancer Center, Departments of <sup>6</sup>Medicine and <sup>7</sup>Cellular and Molecular Medicine, <sup>8</sup>Bioengineering, University of California San Diego; <sup>9</sup>Research and Development, Caris Life Sciences (United States); <sup>10</sup>Jonsson Comprehensive Cancer Center, University of California Los Angeles; <sup>11</sup>Ludwig Institute for Cancer Research

\* These authors contributed equally to this work

\$ These senior authors contributed equally to this work

# Corresponding Authors

Corresponding Authors:

Teresa Davoli, PhD  
Assistant Professor  
Department of Biochemistry and Molecular Pharmacology  
Institute for Systems Genetics  
NYU Langone Health  
New York, NY 10016  
Phone: 212-263-8081; email: [teresa.davoli@nyulangone.org](mailto:teresa.davoli@nyulangone.org)

William N. William Jr., MD  
Adjunct Associate Professor  
Department of Thoracic / Head and Neck Medical Oncology  
The University of Texas MD Anderson Cancer Center  
1515 Holcombe Blvd. unit 432  
Houston, TX 77030  
Phone: 713-792-6363; email: [william.william@bp.org.br](mailto:william.william@bp.org.br)

**This PDF file includes:**

Supplementary text (pages 3-7)  
Figures S1 to S12 (pages 8-19)  
SI References (page 20)  
Tables S1 to S25 (pages 21-88)

## Supplementary Information Text

### Methods – Extended Description

#### *Prospective Oral Precancer Cohort*

**SCNA and Multiplex immune profiling.** Chromosome gain was determined by fluorescence *in situ* hybridization, using a chromosome-7 centromeric probe, randomly selected marker of tri-/tetra-somy based on similar phenotypes with different chromosomes in this context (1). After specific PCR-DNA amplification, an automatic capillary DNA analyzer was used to separate microsatellite alleles and to quantify the peak height of individual alleles for each marker. Loss of at least one of the markers (using the criteria described in the statistical section) was considered as loss of that specific chromosomal site. We considered overall SCNA level as chr7 gain and loss at 7 chromosome arms, including 3p, 9p, and 17p and the following: 4q, 8p, 11q, and 13q.

As described in a prior methods report (2), we utilized a validated multiplex immunofluorescence (mIF) panel of five antibodies stained on the same tissue section, and labeled using a tyramide-signal amplification-based kit, including: anti-CD3 (Dako, T lymphocyte marker), anti-CD8 (clone C8/144B, Thermo Scientific, present on cytotoxic T cells), anti-CD68 (clone PG-M1, Dako, macrophage lineage marker), anti-cytokeratin (clone AE1/AE3, Dako), and DAPI (nuclear staining). Each antibody was labeled with a specific fluorophore. All antibodies had been optimized for mIF by examination of positive and negative controls and testing of the antibodies by Western blotting. We performed scanning and image capture with a multispectral microscope (Vectra™, PerkinElmer), and analyzed the images with a specialized software (InForm™, PerkinElmer) capable of counting the number of cells with positive staining for each marker in a specified area. For each sample, 1-10 representative areas (median 6) measuring 1 mm<sup>2</sup> each, were randomly selected for marker quantification. CD3+ and CD8+ T-cells and CD68+ macrophages were evaluated and reported as cell density (i.e., cells/mm<sup>2</sup>).

**Statistical considerations.** Wilcoxon rank-sum tests were used to compare the distribution of continuous variables between two groups defined by a binary variable. Fisher's exact tests were used to assess the association between binary markers and categorical factors. Spearman correlation coefficients were used to evaluate pair-wise correlations between two markers in continuous scale. When analyzing biomarkers assessed in a continuous scale, values from multiple areas were transformed into logarithm scale and were fit with linear mixed-effect models to account for within-patient variation (3). OCFS (model1) was defined as the time from protocol registration until development of the protocol-specified primary endpoint of invasive oral cancer, or death, and estimated by the Kaplan-Meier method. Cox proportional hazard model was used to study marker and OCFS associations. Log-rank test was performed to test the difference in OCFS between groups. All analyses were performed using SAS software (version 9.4; SAS Institute, Cary, NC) and R.

*Cox Model~ 9p21.3 Loss + 3p14 Loss + 17p13.1 Loss + Histology (model1)*

Throughout the paper, in the univariate (model2) and multivariable (model3) analyses performed to predict the level of a specific parameter (e.g., immune-cell level) based copy-number event, two different cutoffs were used (35 %-65 %, and confirmed with a 50 %). For example, in multivariable logistic regression of precancer cases, we divided the patients into the top and bottom 35 % in terms of percent of immune cells and used loss at 3p14, 9p21.3, or/and

17p13.1, and SCNA level, to determine the contribution of each parameter to the immune-cell landscape. The same cutoffs were used for the analysis of TCGA cases, including IS. The chromosome loss in precancer is defined as the ratio of the peak heights of the two alleles in lesion (L1/L2) DNA and in the corresponding normal lymphocytes (N1/N2) DNA >1.43 or <0.7, consistent with the same cutoffs utilized in the landmark clinical study that prospectively correlated precancer-specific SCNAs with prognosis (4).

The SCNA level was calculated based on the available information on the SCNA level at different genomic loci. More specifically, information was available on the presence of losses at the following loci: 3p21-14, 4q26-28, 4q31.1, 8p22-p23, 9p21.3, 11q13-q22, 13q21, 17p13.1 --SCNA level was calculated based on any SCNA (loss at all microsatellite loci in 3p21-14, 4q26-28, 4q31.1, 8p22, 8p23, 9p21.3, 11q13, 11q22, 13q21, or 17p13.1 and/or chromosome 7 gain):

$$SCNA.level^* = \begin{pmatrix} no\ SCNA & 0\ (none) \\ any\ Loss\ OR\ chr7\ gain & 1\ (low) \\ any\ Loss\ AND\ chr7\ gain & 2\ (high) \end{pmatrix}$$

$$Immune_{infiltrate} \sim 3p14\ Loss\ or\ 9p21.3\ Loss\ or\ 17p13.1\ Loss \times \beta + \varepsilon(\text{random effect})\ (model2)$$

$$Immune_{infiltrate} \sim 3p14\ Loss + 9p21.3\ Loss + 17p13.1\ Loss + SCNA.level\ (model3)$$

#### HPV-Negative HNSC in The Cancer Genome Atlas (TCGA)

**Statistical considerations.** Logistic regression was used to determine the variables most predictive of different parameters representing immune infiltrate (model4-5) and IS levels. All the findings were confirmed using two purity methods (pathology-based and ABSOLUTE, see main manuscript Methods) and reported in the supplemental tables. After purity adjustment, we consider a log2-transformed copy number ratio >0.3 as a gain and <(-0.3) as a loss. Gene expression, mutation and clinical data were downloaded from GDAC Firehose. Patients with nonsense, splice site, frame shift, and missense mutations with Polyphen2-HVAR score > 0.2 (5) were considered as *TP53* mutation-positive patients. HPV-status was determined using a cutoff of RPM >1 (viral reads per million) in tumors of oropharyngeal origin was used as a stringent definition of HPV-positive HNSC, for a limited subset analysis. We used the log2 transformed RSEM values to estimate differences in the immune cell content (different types of immune cells) using CIBERSORT (using the LM22 gene signature) (6). In order to recapitulate in HNSC what was done in oral precancers, RNA expression levels of specific immune markers were applied as a proxy of the level of the corresponding immune cells in the tumor. Previous studies have shown that RNA expression levels (e.g., CD8+) of immune-cell markers highly correlate with cell estimates based on immunofluorescence (7, 8) (see Results). We defined the tumors as having low or high gene expression level using the 35<sup>th</sup> and 65<sup>th</sup> percentiles; results were confirmed using a cutoff of 50%. We used the GISTIC2 algorithm to distinguish between the two major types of events--arm-level and focal-level events. When specified, logistic regression was performed after first selecting patients with a certain tumor stage or containing or not *TP53* mutations. In addition, 5-fold cross-validation and variable-importance (size-effect) evaluation (package caret) were also performed to evaluate the accuracy of multivariable logistic regression models, and the size effect of each covariate, respectively.

$$SCNA\ level = \sum arm\ gains + \sum arm\ losses$$

$$Immune_{infiltrate} \sim 3p14\ Loss + 9p21.3\ Loss + 17p13.1\ Loss + Chr\ 7\ Gain$$

$$+ SCNA\ level\ (normalized)\ (model4)$$

$$Immune_{infiltrate} \sim 9p21.3 \text{ Loss}(arm) + 9p21.3 \text{ Loss}(focal) + 9p21.3 \text{ Loss}(arm + focal) + 3p14 \text{ Loss} + SCNA \text{ level (normalized)} \text{ (model5)}$$

For the least absolute shrinkage and selection operator (*Lasso*) (9) classification, to determine the parameters most predictive of immune-infiltrate level, we defined tumors as having low or high IS levels using the 35<sup>th</sup> and 65<sup>th</sup> percentiles, as described previously (10), and used a binomial model. We also applied *Lasso* using 10-fold cross validation. As variables, we included the presence of loss or gain in all possible whole chromosome or chromosome arms across the genome and the overall arm/chromosome SCNA level.

For GSEA (Gene Set Enrichment Analysis) comparing tumor samples with or without the indicated SCNA, we first used DEseq2 package (11) to calculate the log2 fold change and adjusted p-value of differentially expressed genes. Then we calculated the differential-expression score [Exp. Score] based on the formula below. Exp. Score was then used to perform GSEA pathway analysis (pre-ranked model) (12).

$$Exp. \text{ Score} = \text{sign}(\log_2 \text{ FoldChange}) \times -\log_{10}(\text{adjusted } p\_value)$$

### *HPV-negative HNSC Cell Lines*

**Statistical considerations.** We used GSEA to investigate mechanisms of 9p21.3 or 3p14 (selected based on statistical significance in TCGA analyses) effects on gene- and pathway-change. To have similar numbers of cells in each group we split the cell lines into those having a copy-number level lower or higher than the median value (for example, as a threshold we used the median based on log2 copy-number ratio of -0.45 for 9p21.3 and -0.5 for 3p14 region). We used DEseq2 (11) to estimate the differential expression between the two groups of cell lines. We then used the formula above to calculate a score as input in GSEA (12). For GSEA, we used the comprehensive list of pathway and gene sets from BIOCARTA, KEGG and REACTOME databases. We performed logistic regression (model6) to determine the parameters most predictive of the expression of the SASP signature pathway (see below). We distinguished cell lines as having low or high SASP-signature scores using the 35<sup>th</sup>/65<sup>th</sup>, or 50<sup>th</sup> percentile cutoff (binary) or continuous variable of the distribution (all the continuous variables were normalized before being used in the multivariable models). We applied a logistic model on the dataset using as variables, 3p14 loss or 9p21.3 loss. To determine the contribution of chromosome loss encompassing whole 9p, 3p, and 17p arms as compared to focal losses, we used GISTIC2. Applying GISTIC2 algorithm to segment data derived from the cell lines, we determined the type of loss at 9p21.3 and 3p14: arm-level event versus focal-only event. As in TCGA analyses, a threshold of 70% of arm length (given in units of the fraction of chromosome arm) was used in GISTIC2 to distinguish between cell-line focal- and arm-level events.

$$SASP \text{ enrichment} \sim 9p21.3 \text{ Loss}(arm) + 9p21.3 \text{ Loss}(focal) \text{ (model6)}$$

**SASP and *IFN* gene set.** To derive an aneuploidy-associated SASP signature, we first considered the genes upregulated in SASP as previously reported (13). Then we crossed this gene list with the genes upregulated (log2FC of at least 1.5) in aneuploid cells versus control cells (reversine treated versus control) from (14). The derived list of 20 genes represents the SASP signature and is shown in Table S15. The *IFN* gene set contains the list of *IFN* genes that are located on chr 9p21.3 and shown in Table S15. To calculate the SASP gene-expression signature and *IFN* gene expression we used the single-sample GSEA (ssGSEA package) (12).

## Survival analysis of 9p loss in ICB treated HPV-negative HNSC

**Statistical, profiling considerations for real-world evidence (RWE) cohort.** We employed a novel “virtual karyotyping” platform that allowed interrogation of the associations between loss of genes/chromosomal regions in 9p or 3p and outcomes using linked biomarker-EMR-insurance claim-survival record data. The Caris Life Sciences CODEai database which contains over 215,000 molecular profiles combined with clinical outcomes was leveraged for this study. 2,761 HNSC cases were available of which 1,604 had results from the Caris 592-gene assay. These cases were then segregated by whether therapy was administered prior to the collection of the sample that was profiled. 479 cases were found to have therapy administration only after the collection date of the tumor profiled. The 479 cases were further subdivided into groups based on whether immunotherapy (nivolumab or pembrolizumab) was part of their treatment. An overall survival minimum of 30 days was selected to remove patients with incomplete outcomes records (filtered down to 455). 196 of the 455 cases were HPV negative assessed by p16 IHC status. 122 patients were treated with immunotherapy across various lines of treatments with and without chemotherapy. 74 patients were found to have no immunotherapy treatment (Consort diagram, Fig. S12). TMB in our 592-gene panel was found to be equivalent to the FDA-approved 324-gene companion diagnostic test related to the agnostic use of pembrolizumab for tumors with  $\geq 10$  mutations/megabase (15). The 592-gene MI Tumor Seek panel was used to validate anti-PD-1 therapy efficacy in relation to MSI status (16).

Microdissection was performed on all cases and only those that achieved a minimum of 20% of tumor content in the area selected for microdissection were sequenced. We derived the SCNA level by comparing the depth of sequencing of genomic loci to a diploid control as well as the known performance of these genomic loci from a CLIA-validated commercially available assay (MI Tumor Seek 592-gene panel; Caris Life Sciences), as recently described (17). The 592-gene panel arm loss algorithm was CAP/CLIA validated in a study comparing 436 patients with both 592-gene panel arm-loss predictions and FISH results for 1p/19q co-deletion, a pattern shown to be therapeutically relevant in glial-brain tumors, e.g., low-grade gliomas (18). There were 29 samples positive by FISH and 407 samples negative by FISH for 1p/19q co-deletion and the arm-loss algorithm predictions had a sensitivity of 96.6 % (95 % CI: 82.2-99.9) and specificity of 99.5 % (95 % CI: 98.2-99.9). The 592-gene panel arm loss algorithm was further validated against the Caris Life Sciences Whole Exome Sequencing (WES) assay on 369 cases with both 592-gene panel arm-loss predictions and WES arm-loss predictions. WES used a conservative copy-number estimate across entire chromosomes, excluding centromeres and telomeres. This estimate included ~50,000 intronic and intergenic SNPs which were present at minimum every 160,000 base intervals (6.25/megabase) along with depth data from every gene. The calculation used CNVKit (python 3.7, version 0.9.6) and provided confidence in deletion status by examining tens of thousands of data points and returning a call based on consecutive measurements of presence or absence of DNA. The Pearson's correlation between the two assays was 0.828 across 9p loss and 0.773 for 9p21.3 loss. *PD-L1*, *PD-L2*, and *JAK2* were evaluated for copy-number loss using 1.6 copies or less to determine if the gene is deleted as described previously (19). The 592-gene panel arm-loss algorithm evaluated large-scale gene deletions across both arms of all chromosomes where a gene was profiled. The mean copy number across all genes profiled on a region or arm was compared to the mean of all copies for genes profiled on the opposite arm. The resulting ratios for each chromosome must be  $\leq 0.8$  and the opposite arm cannot have an average copy number greater than 2.5 for the region or arm under consideration to be evaluated as lost. Larger cohorts using whole-exome or whole-genome sequencing data will be important to extend these findings, including to address the contribution of *TP53* mutations to ICB resistance, an analysis currently limited by statistical power due to the high *TP53* mutation-9p loss co-occurrence rates.

## **Contributions**

SML and TD conceived, planned and provided biologic and clinical (prevention, interception and immune therapy) intellectual input and insight into all aspects of this project, including all patient-cohort and cell-line studies and results—study design, statistical analyses and led the data interpretation, potential application and implications to HNSC, other cancers and aneuploid diseases—copy-number, aneuploid, -immune concept, balance and model development, and writing; WNW and SML planned, assembled and conducted the prospective precancer cohort; HYL and JJJ contributed to the design and analysis of the precancer cohort; XZ performed most of the statistical analyses for precancer and TCGA datasets; JJB provided essential contribution to the analyses and their interpretation. JPA, DBS, and SML provided the analysis, data interpretation and insight of the RWE cohort. WC provided essential insight into the development and conduct of the project, including the conception of the model concept. SML, TD, WNW and XZ wrote the manuscript. All the authors contributed to editing the manuscript.

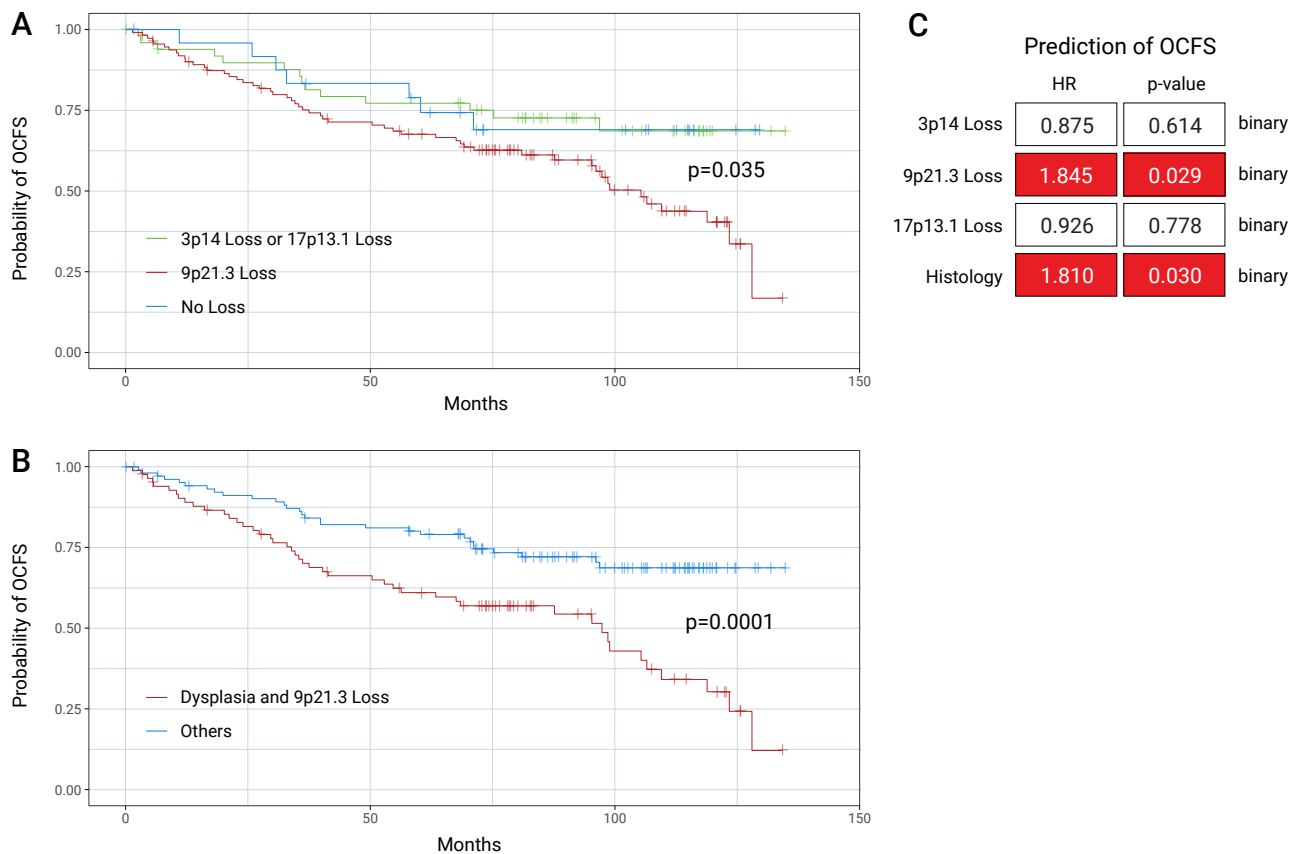

**Fig. S1. Predictors of cancer risk in prospective oral precancer cohort**

A) Kaplan-Meier curves of oral cancer-free survival (OCFS) by SCNAs (9p21.3, 3p14 or 17p13.1 loss, no chromosomal loss).

B) Kaplan-Meier curves of OCFS by combination of SCNA with histology status (dysplasia and 9p21.3 loss versus others).

C) Multivariable Cox-proportional hazard model for prediction of survival (OCFS).



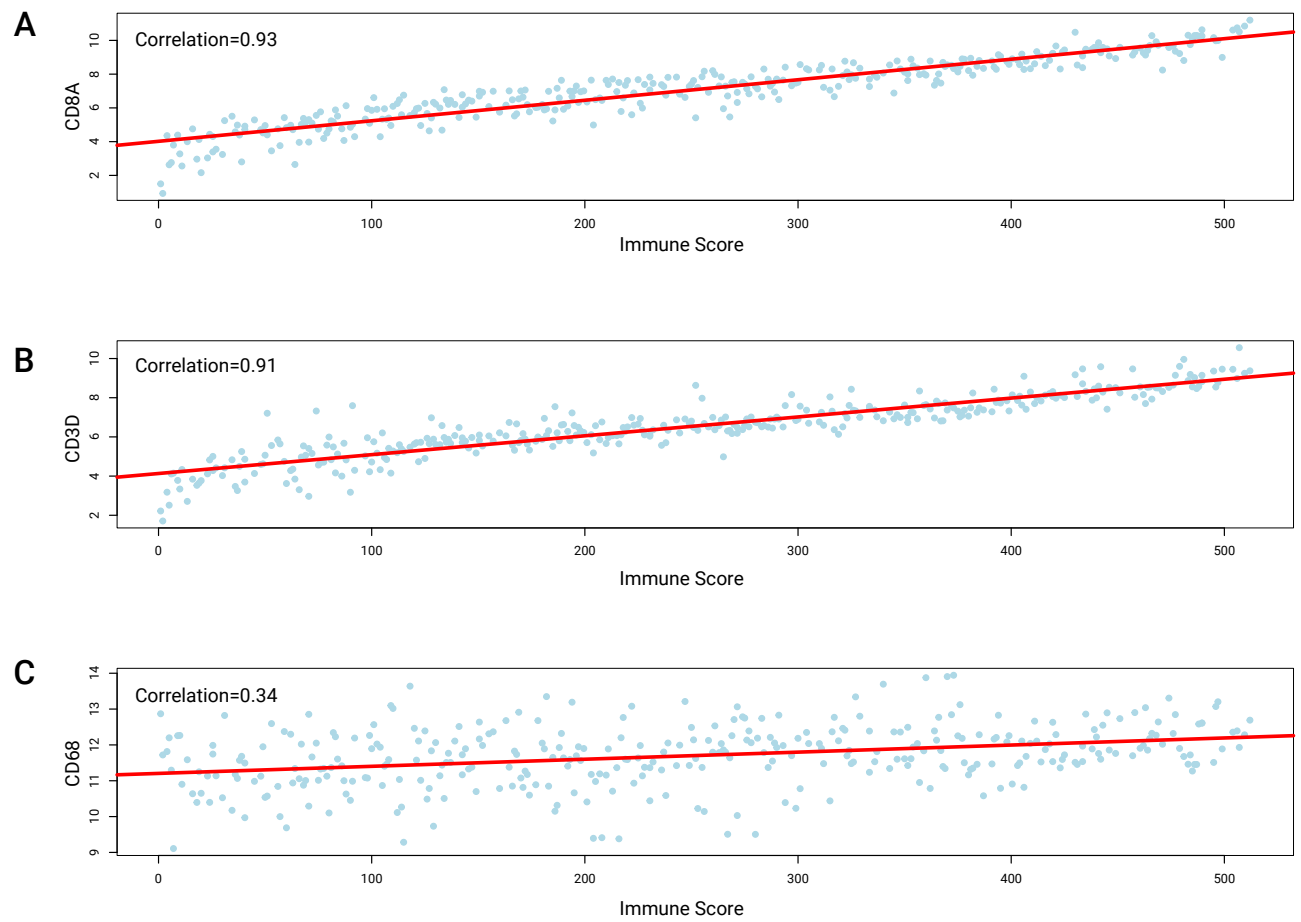

**Fig. S2. CD3+ (CD3D), CD8+ (CD8A) or CD68 expression and IS in HNSC**

**A** Loss at any site (3p14, 9p21.3 or 17p13.1)

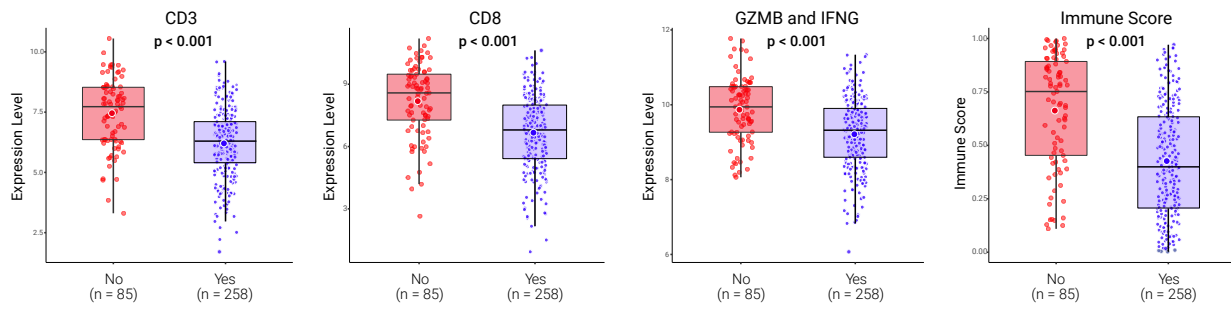

**B** SCNA Level top 35% vs bottom 35%

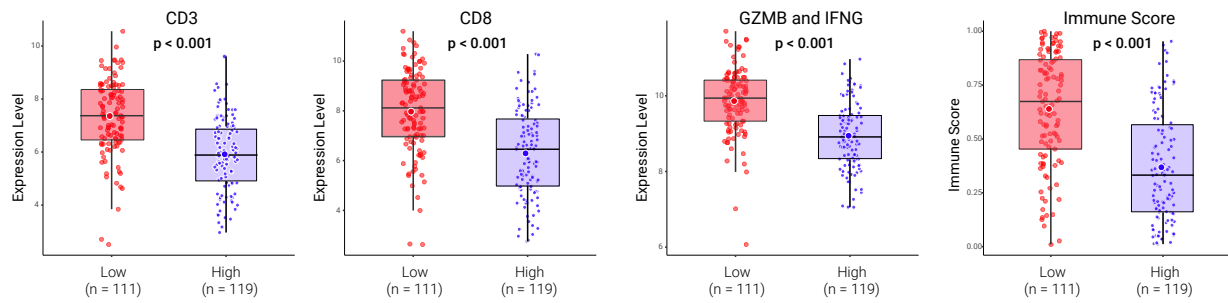

**C** Chr 7 gain

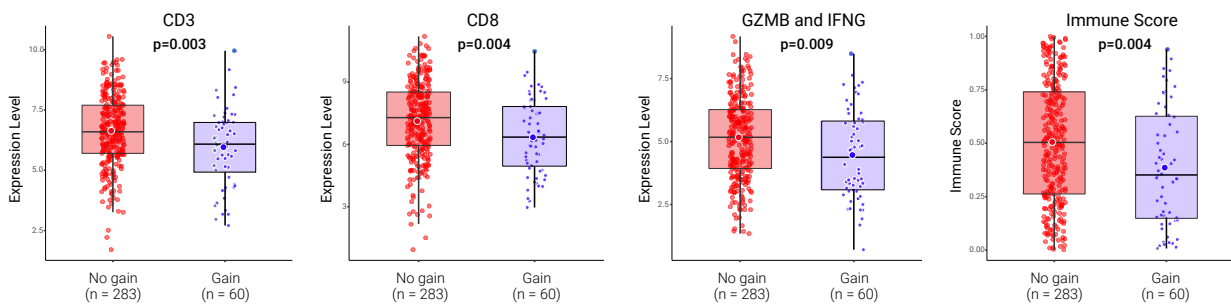

**Fig. S3. SCNA associations with CD3+, CD8+, GZMB/IFNg or IS in HNSC**

CD3+, CD8+ and GZMB/IFNg (average expression of the two genes) or IS associations with the presence of any loss (arm or focal) at 9p21.3, 3p14, or 17p13 (A), SCNA level (B), or chr7 gain (C).

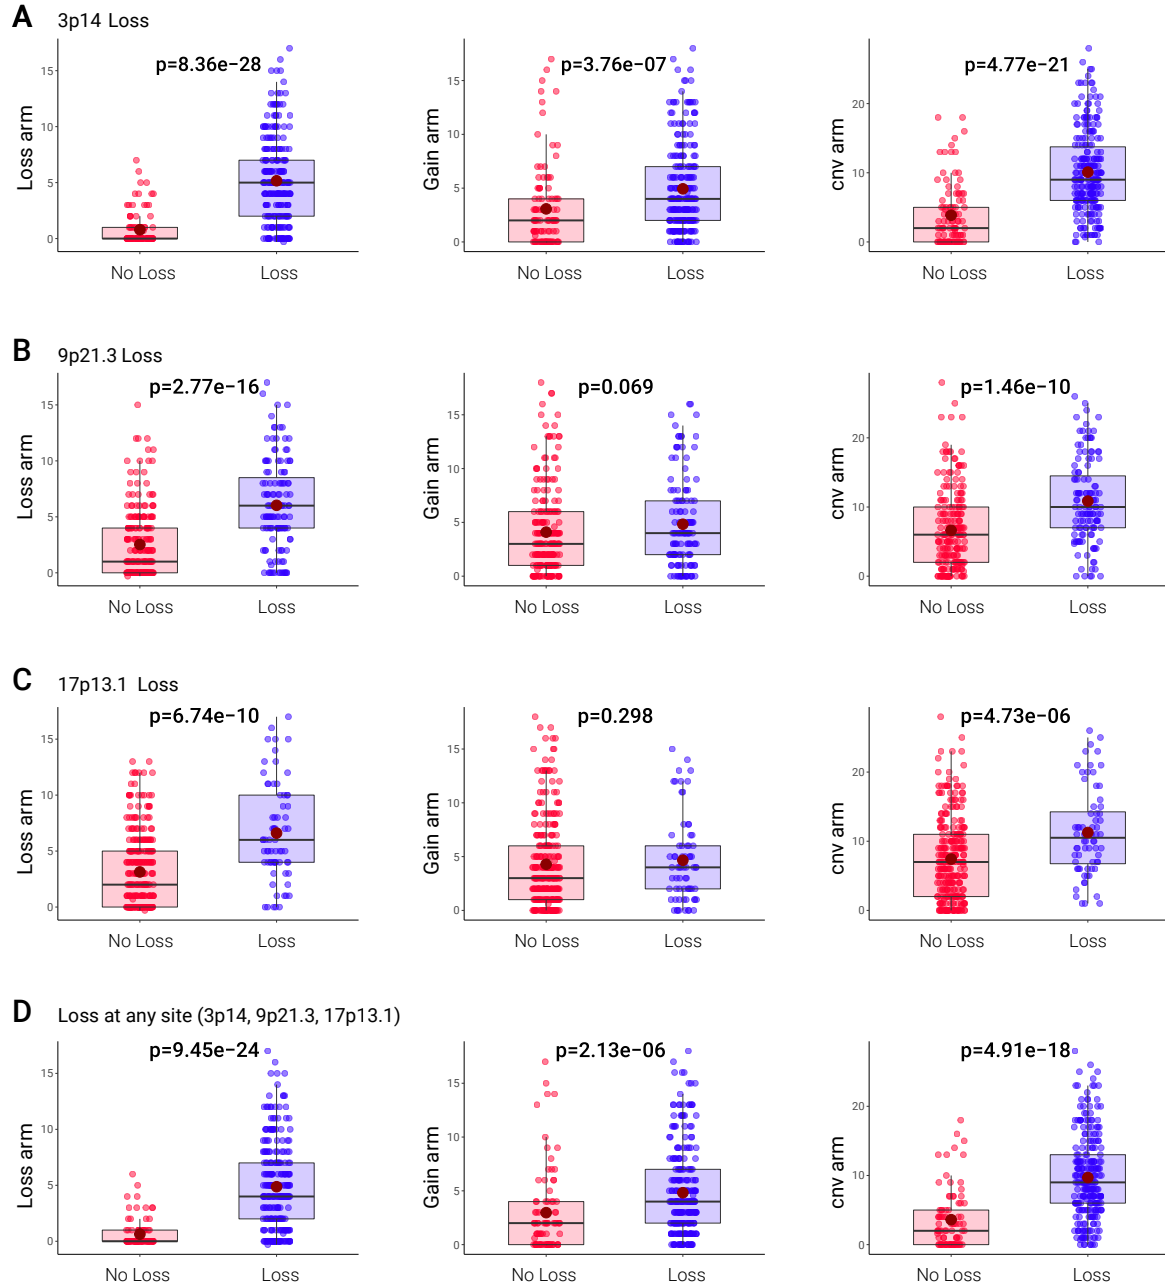

**Fig. S4. 3p14, 9p21.3 or 17p.13.1 loss (arm or focal) associated with SCNA level in HNSC**

A) Relationship between the number of arm loss (loss\_arm), gain (gain\_arm) and SCNA level (loss\_arm + gain\_arm, cnv\_Arm) between samples with and without 3p14 loss (arm or focal).

B) Arm loss, gain and SCNA level associations with and without 9p21.3 loss.

C) Arm loss, gain and SCNA level associations with or without 17p13.1 loss.

D) Arm loss, gain and SCNA level associations with or without loss (arm or focal) at any of the three sites (3p14, 9p21.3 or 17p13.1) (p-value is from Wilcoxon test).

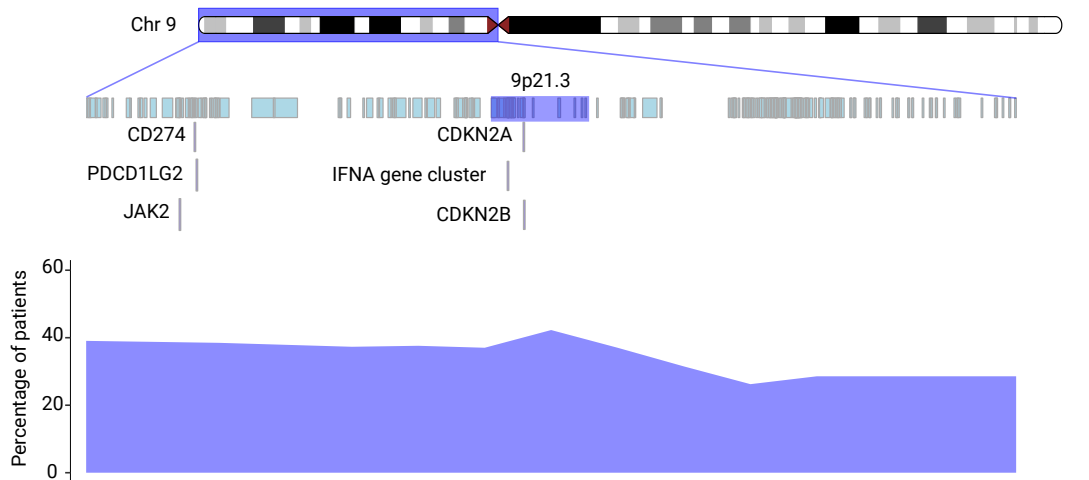

**Fig. S5. Percentage of loss on arm 9p in HNSC (based on cytoband regions)**

Representative genes indicated.

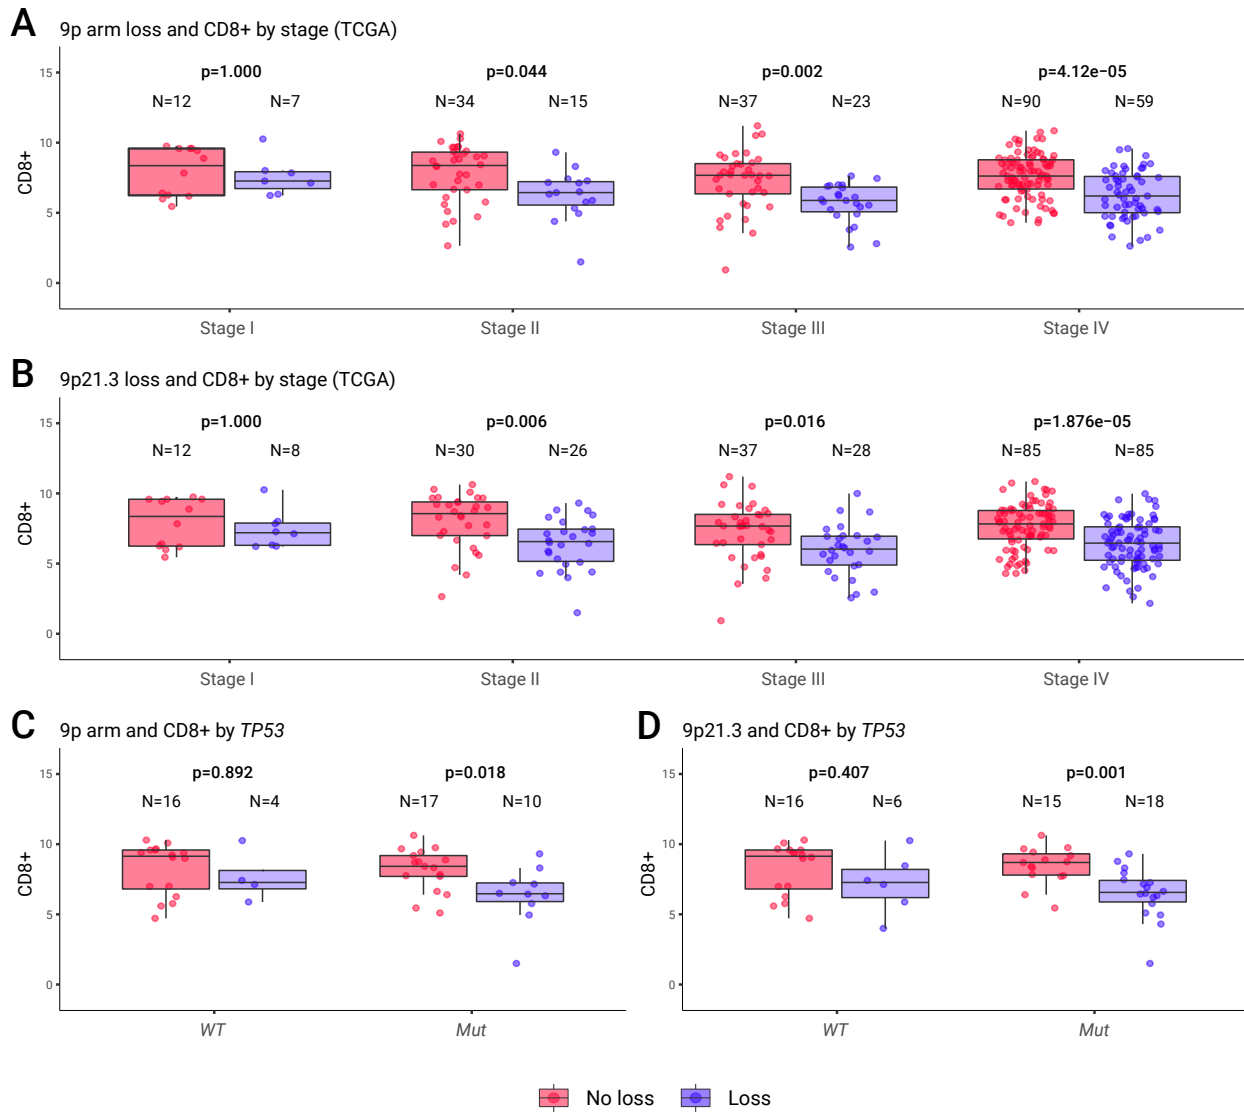

**Fig. S6. Chromosome-9p loss and CD8+ T-cell associations with HNSC stage and *TP53* status**

Association between CD8+ T-cell levels and 9p loss (A) and 9p21.3 loss (B), in relationship with tumor stage and *TP53* mutation status (C and D) in HPV-negative stage I or II HNSC tissue samples.

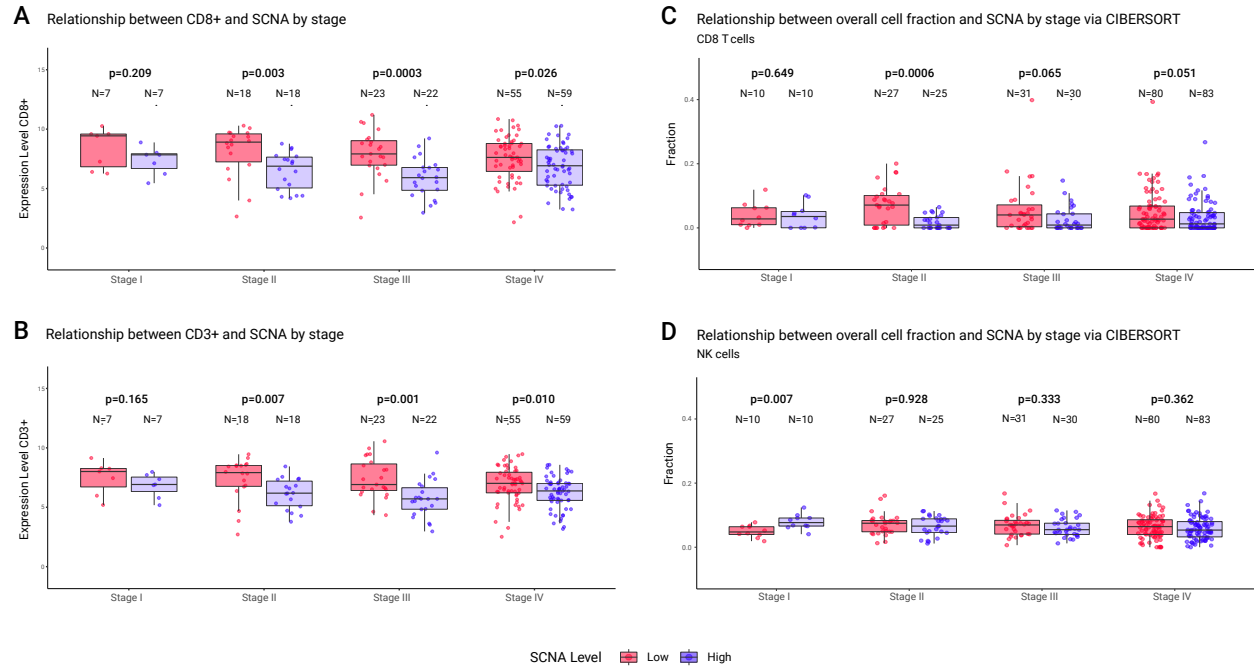

**Fig. S7. SCNA level to different HNSC tumor stage**

- A) SCNA level and CD8+ T cells in relation to tumor stage.
- B) SCNA level and CD3+ T cells in relation to tumor stage.
- C) SCNA level and CD8 T cells (via CIBERSORT) in relation to tumor stage.
- D) SCNA level and NK cells (via CIBERSORT) in relation to tumor stage.

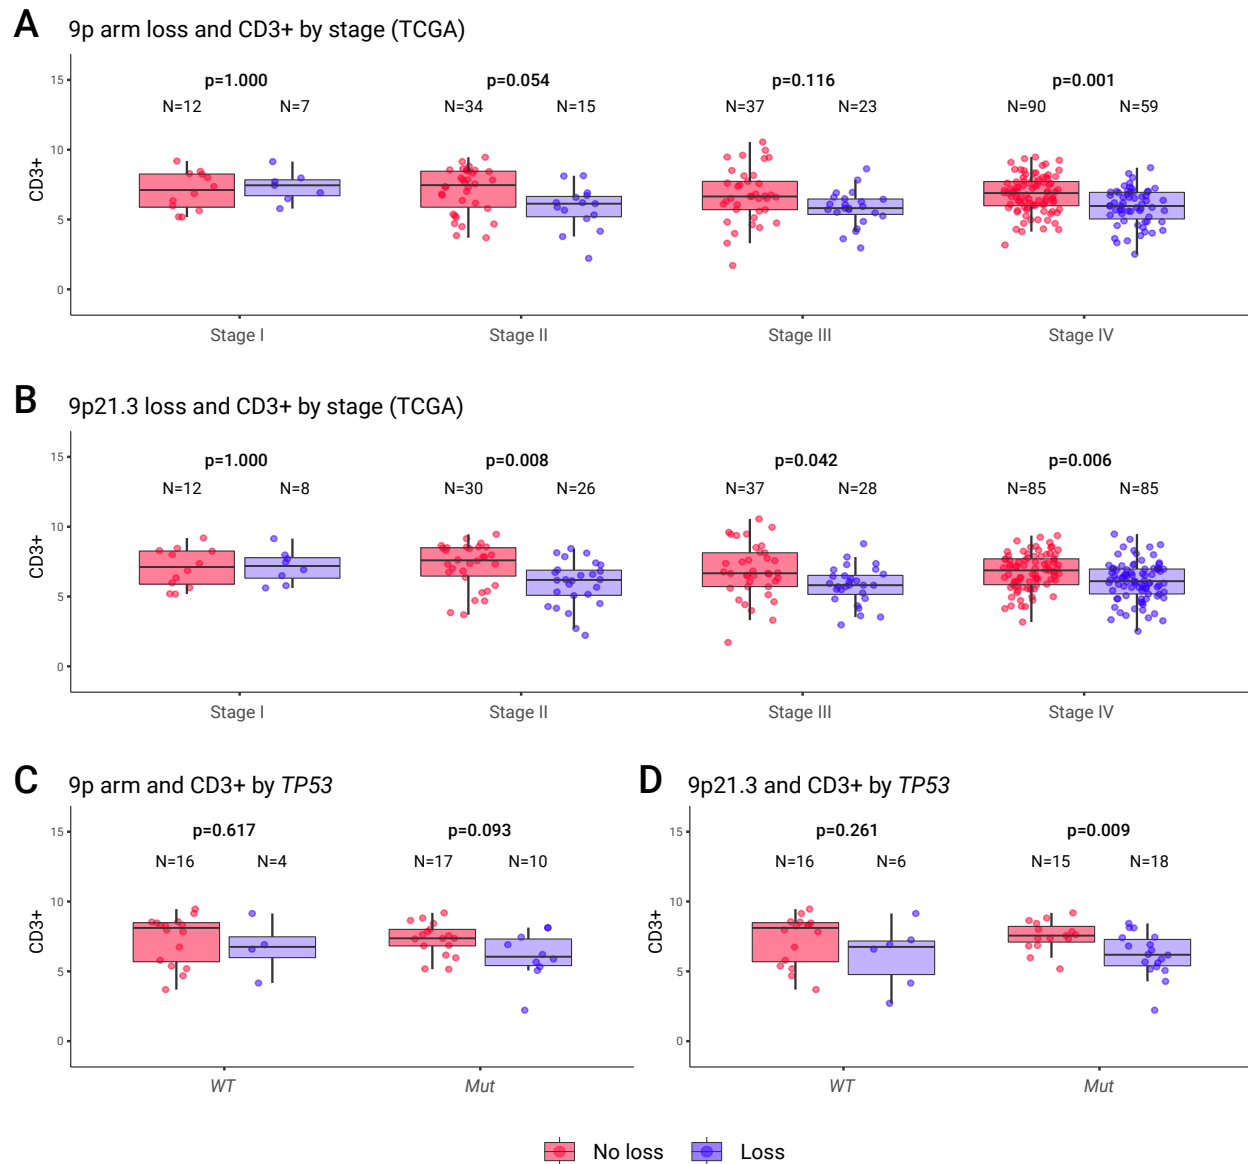

**Fig. S8. Chromosome 9p loss and CD3+ T-cell associations with HNSC stage and *TP53***

Association between CD3+ T-cell levels and 9p loss (A) and 9p21.3 loss (B), in relationship with tumor stage and *TP53* mutation status (C and D) in HPV-negative HNSC tissue samples, the latter focused on stage-I and -II samples.

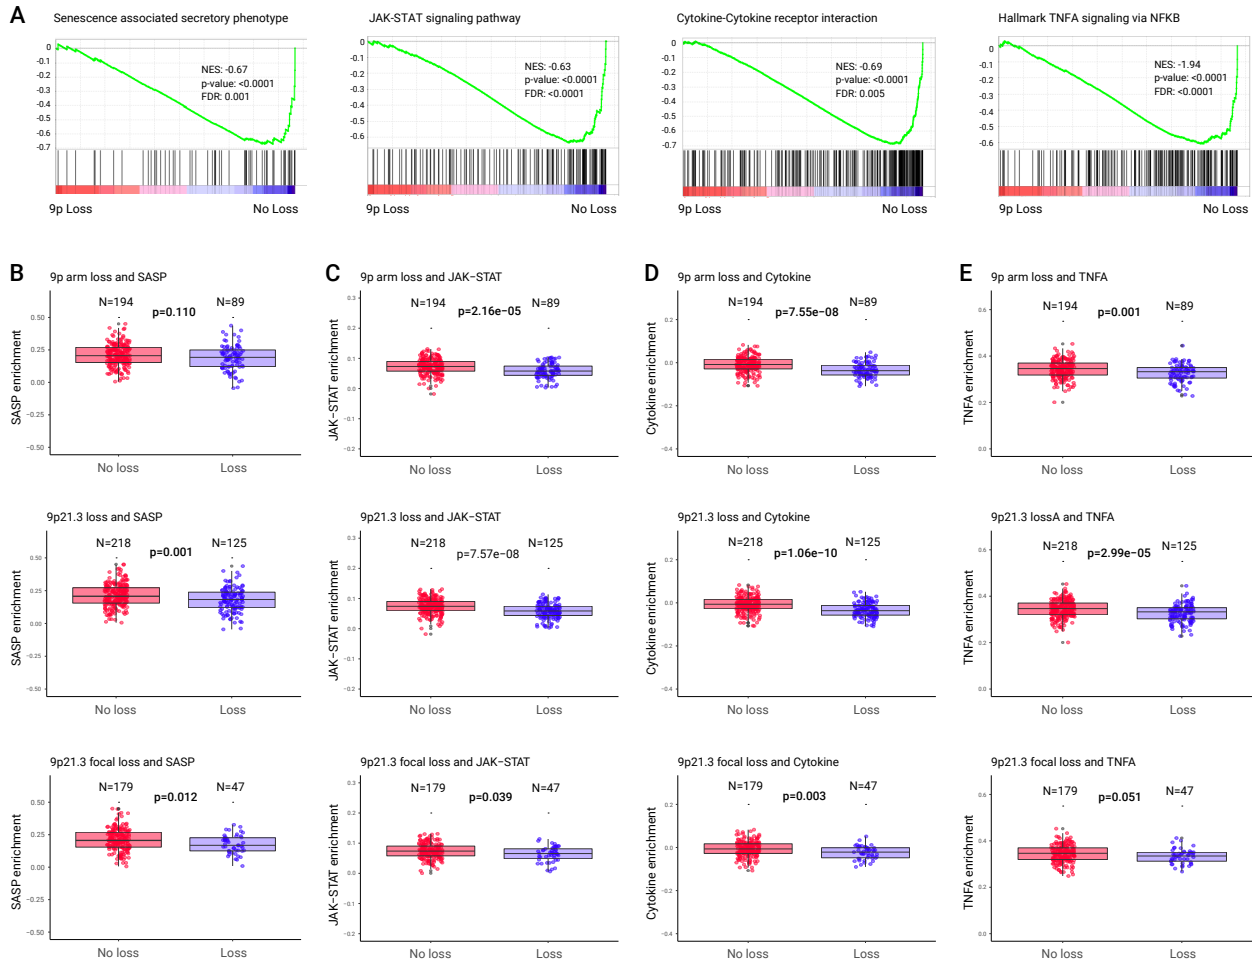

**Fig. S9. SASP, JAK/STAT and Cytokine receptor and TNFA Signaling via NFkB Pathways in relationship with 9p or 9p21.3 loss in HPV-negative HNSC tumors**

A) Pathway depletion from GSEA analysis of HPV-negative HNSC tumors comparing samples with and without 9p loss. GSEA plots, NES (normalized enrichment score), p-value and FDR.

B-E) Relationship between the gene expression of the SASP (B), JAK/STAT (C), Cytokine-cytokine receptor pathway (D) and TNFA Signaling via NFkB (E), and 9p arm loss, 9p21.3 loss, or 9p21.3 “focal” loss in HNSC tumors. p-value is from Wilcoxon test.



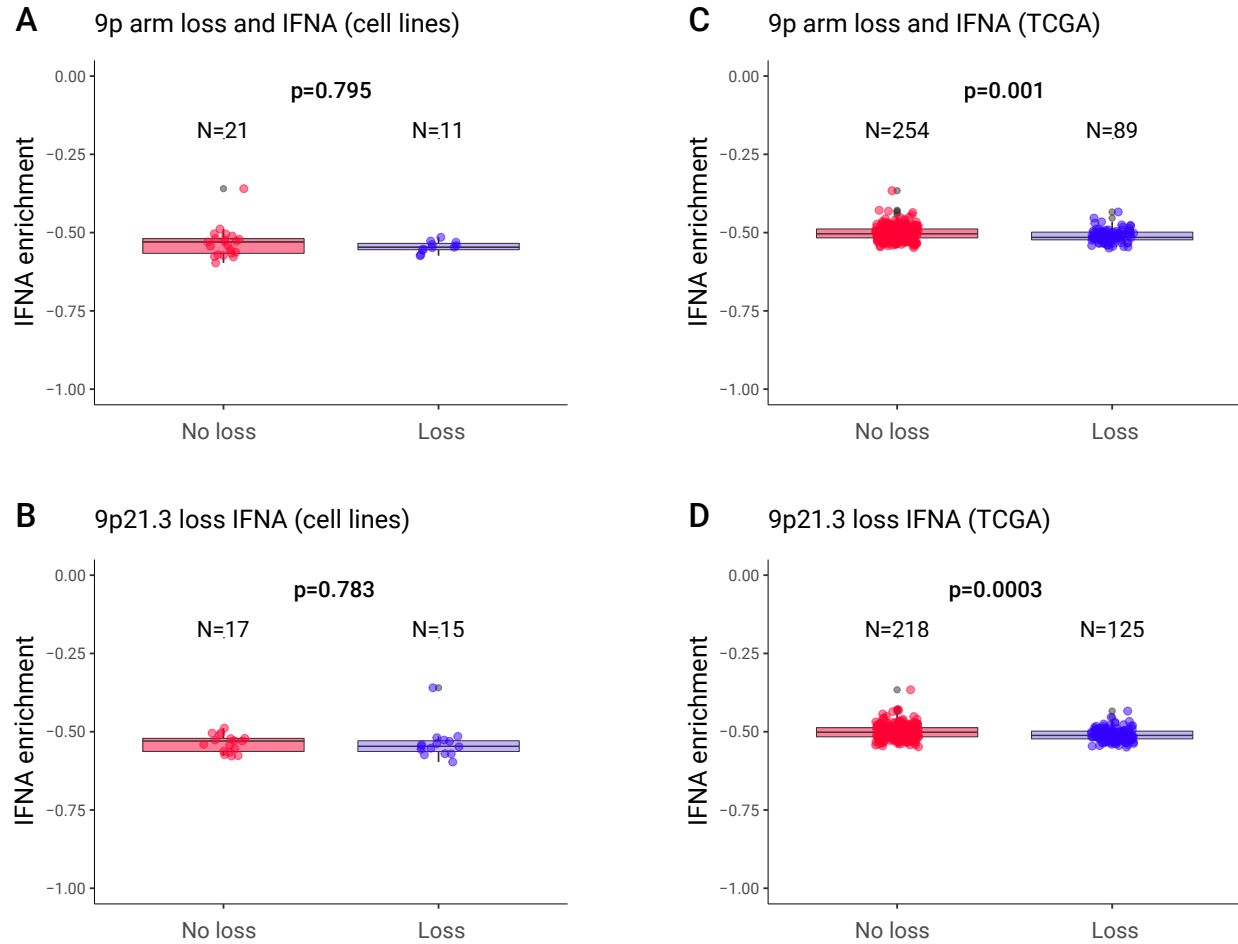

**Fig. S10. IFNA gene set enrichment in HPV-negative cell lines or tumors with or without 9p or 9p21.3 loss**

A-D) Relationship between *IFNA* gene set enrichment (through ssGSEA, see also Table S15 for gene set) and 9p arm or 9p21.3 loss in HPV-negative cell lines (A, B) or tumors (C, D). p-value is from Wilcoxon test.

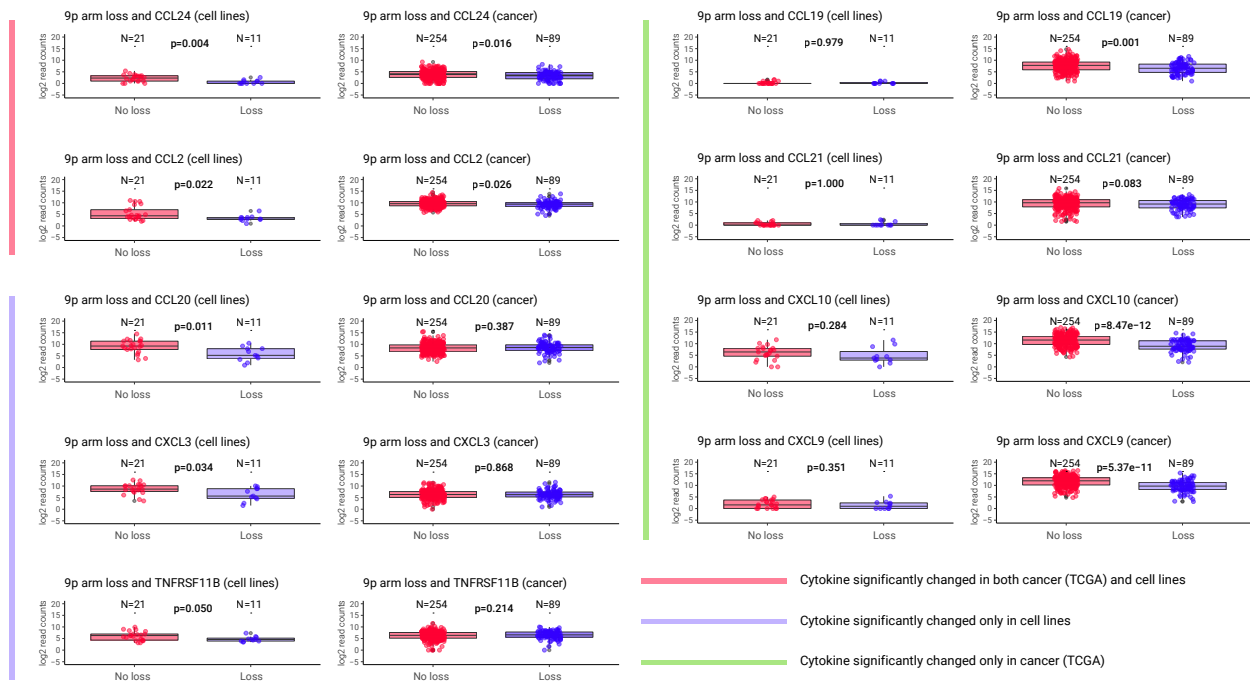

**Fig. S11. Representative genes differentially expressed in tumors or cell lines with or without 9p loss**

Relationship between the expression level of the indicated genes comparing HPV-negative cell lines or tumors with or without 9p arm-level. p-value is from Wilcoxon test.

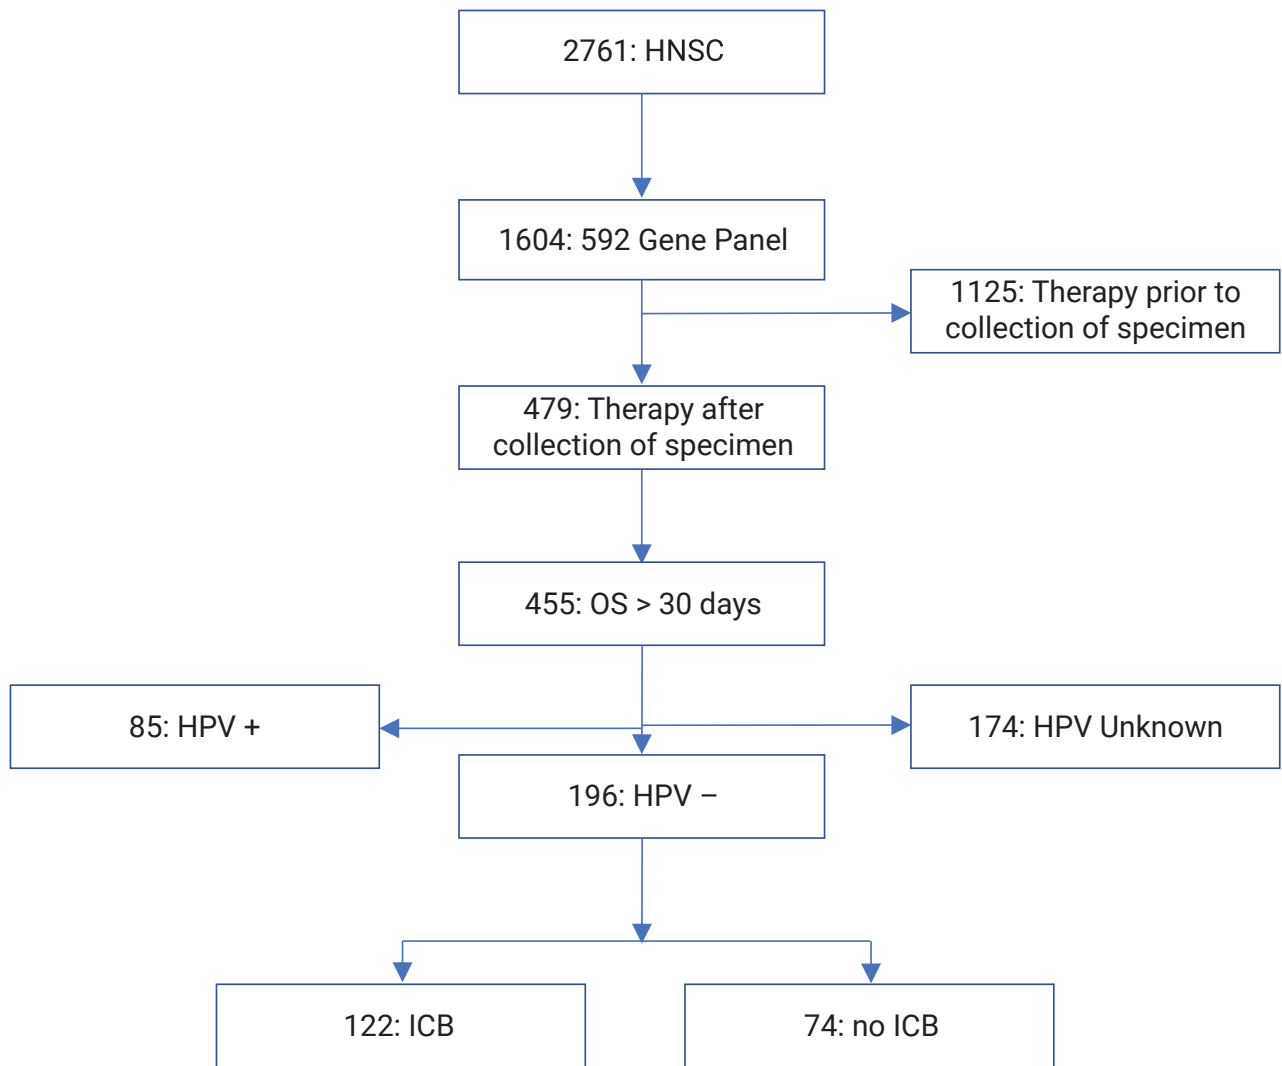

**Fig. S12. Consort diagram of Real-World Evidence (RWE) cohort**

Cohort of HPV-negative HNSC patients treated with nivolumab or pembrolizumab (or chemotherapy) whose tumors had been profiled using a next generation sequencing platform, as recently described (19).

## REFERENCES

1. W. N. Hittelman, Genetic instability in epithelial tissues at risk for cancer. *Ann N Y Acad Sci* **952**, 1-12 (2001).
2. E. R. Parra *et al.*, Validation of multiplex immunofluorescence panels using multispectral microscopy for immune-profiling of formalin-fixed and paraffin-embedded human tumor tissues. *Scientific Reports* **7**, 13380 (2017).
3. J. Jiang, *Linear and Generalized Linear Mixed Models and Their Applications*, Springer Series in Statistics (Springer-Verlag New York, ed. 1, 2007), 10.1007/978-0-387-47946-0, pp. 257.
4. W. N. William, Jr. *et al.*, Erlotinib and the Risk of Oral Cancer: The Erlotinib Prevention of Oral Cancer (EPOC) Randomized Clinical Trial. *JAMA oncology* **2**, 209-216 (2016).
5. I. A. Adzhubei *et al.*, A method and server for predicting damaging missense mutations. *Nat Methods* **7**, 248-249 (2010).
6. A. M. Newman *et al.*, Robust enumeration of cell subsets from tissue expression profiles. *Nat Methods* **12**, 453-457 (2015).
7. J. E. Beane *et al.*, Molecular subtyping reveals immune alterations associated with progression of bronchial premalignant lesions. *Nat Commun* **10**, 1856 (2019).
8. A. Mezheyeuski *et al.*, Multispectral imaging for quantitative and compartment-specific immune infiltrates reveals distinct immune profiles that classify lung cancer patients. *J Pathol* **244**, 421-431 (2018).
9. R. Tibshirani, Regression Shrinkage and Selection via the Lasso. *Journal of the Royal Statistical Society. Series B (Methodological)* **58**, 267-288 (1996).
10. T. Davoli, H. Uno, E. C. Wooten, S. J. Elledge, Tumor aneuploidy correlates with markers of immune evasion and with reduced response to immunotherapy. *Science* **355** (2017).
11. M. I. Love, W. Huber, S. Anders, Moderated estimation of fold change and dispersion for RNA-seq data with DESeq2. *Genome Biol* **15**, 550 (2014).
12. A. Subramanian *et al.*, Gene set enrichment analysis: a knowledge-based approach for interpreting genome-wide expression profiles. *Proceedings of the National Academy of Sciences of the United States of America* **102**, 15545-15550 (2005).
13. J. P. Coppé *et al.*, Senescence-associated secretory phenotypes reveal cell-nonautonomous functions of oncogenic RAS and the p53 tumor suppressor. *PLoS Biol* **6**, 2853-2868 (2008).
14. S. Santaguida, E. Vasile, E. White, A. Amon, Aneuploidy-induced cellular stresses limit autophagic degradation. *Genes Dev* **29**, 2010-2021 (2015).
15. D. M. Merino *et al.*, Establishing guidelines to harmonize tumor mutational burden (TMB): in silico assessment of variation in TMB quantification across diagnostic platforms: phase I of the Friends of Cancer Research TMB Harmonization Project. *J Immunother Cancer* **8** (2020).
16. D. T. Le *et al.*, Mismatch repair deficiency predicts response of solid tumors to PD-1 blockade. *Science* **357**, 409-413 (2017).
17. K. Zimmer *et al.*, WRN-Mutated Colorectal Cancer Is Characterized by a Distinct Genetic Phenotype. *Cancers (Basel)* **12** (2020).
18. A. M. Taylor *et al.*, Genomic and Functional Approaches to Understanding Cancer Aneuploidy. *Cancer Cell* **33**, 676-689 e673 (2018).
19. J. P. Abraham *et al.*, Clinical validation of a machine-learning derived signature predictive of outcomes from first-line oxaliplatin-based chemotherapy in advanced colorectal cancer. *Clinical Cancer Research* 10.1158/1078-0432.Ccr-20-3286, clincanres.3286.2020 (2020).

William et al.

## List of Supplemental Tables

### Table S1

- S1A** Selected patient characteristics and markers for oral precancer cohort.
- S1B** Co-occurrence analysis of SCNAs in oral precancer.

### Table S2

Association between immune parameters and copy number alterations or clinical parameters in oral pre-cancer.

- S2A** Distributions of CD3+, CD8+ and CD68+ by different parameters, and p-values for comparing between the two groups for each covariate using the linear mixed effect models on log-transformed data.
- S2B** Logistic regression analysis for the prediction of the indicated parameters (CD3+, CD8+ and CD68+) in precancer data.
- S2C** Univariate analysis for prediction of the indicated parameters (CD3+, CD8+ and CD68+) in precancer data.
- S2D** Univariate analysis for oral cancer-free survival according to clinical/demographic/biomarker characteristics
- S2E** Cox proportional hazards model for OCFS of the indicated parameters in precancer data.

### Table S3

Association between immune parameters and copy number alterations in HPV-negative HNSC tumor samples from TCGA.

- S3A** Logistic Regression for the prediction of immune infiltrate parameters in HNSC tumor samples ; binary definition of loss or gain.
- S3B** Logistic Regression for the prediction of immune infiltrate parameters in HNSC tumor samples ; copy number level considered as continuous variables.
- S3C** Logistic Regression for the prediction of CD8+ in HNSC tumor samples - after separating arm-level and focal-level loss at 9p21.3.
- S3D** Logistic Regression for the prediction of CD8+ in HNSC tumor samples - after separating arm-level and focal-level loss at 3p14.
- S3E** Logistic Regression for the prediction of CD8+ in HNSC tumor samples - after separating arm-level and focal-level loss at 17p13.1.
- S3F** Co-occurrence analysis of immune infiltrate parameters in HPV-neg HNSC tumor samples.
- S3G** Logistic Regression for the prediction of CD3+ in HNSC tumor samples - after separating arm-level and focal-level loss at 9p21.3.
- S3H** Logistic Regression for the prediction of CD3+ in HNSC tumor samples - after separating arm-level and focal-level loss at 3p14.
- S3I** Logistic Regression for the prediction of CD3+ in HNSC tumor samples - after separating arm-level and focal-level loss at 17p13.1.

**S3J** Logistic Regression for the prediction of immune infiltrate parameters in HNSC tumor samples with additional clinical parameters binary definition of loss or gain.

**S3K** 5-fold cross validation of Logistic Regression for the prediction of immune infiltrate parameters in HNSC tumor samples with extra clinical information, binary definition of loss or gain.

**S3L** Logistic Regression for the prediction of CD8+ in HNSC tumor samples, binary definition of loss or gain.

#### **Table S4**

Association between immune parameters and copy number alterations in HPV-negative oral tumor samples from TCGA.

**S4A** Logistic Regression for the prediction of immune infiltrate parameters in oral tumor samples.

**S4B** Logistic Regression for the prediction of CD8+ in oral tumor samples - after separating arm-level and focal-level loss at 9p21.3.

**S4C** Logistic Regression for the prediction of CD8+ in oral tumor samples - after separating arm-level and focal-level loss at 3p14.

**S4D** Logistic Regression for the prediction of CD8+ in oral tumor samples - after separating arm-level and focal-level loss at 17p13.1.

#### **Table S5**

Lasso-based prediction model of Immune Score in HNSC tumor samples (TCGA). Variable Selection.

#### **Table S6**

Association between immune parameters and copy number alterations and other parameters in HPV-negative HNSC tumor samples from TCGA.

**S6A** Logistic Regression for the prediction of CD8+ in HNSC tumor samples after considering the tumor stage.

**S6B** Logistic Regression for the prediction of CD8+ in HNSC tumor samples after considering the *TP53* status.

**S6C** Pearson's correlation analysis between CD8+/CD3+ and 9p arm loss in HNSC tumor samples after considering the *TP53* status.

**S6D** Wilcoxon Signed Rank Test between CD8+/CD3+ and 9p arm loss/9p21.3 loss in HNSC tumor samples after considering the *TP53* status.

#### **Table S7**

Relationship between Immune Markers and SCNA Events in HPV-positive HNSC (N=36).

**S7A** Comparison of the frequencies of different copy number events in HPV positive and negative HNSC.

**S7B** Logistic Regression for the prediction of immune infiltrate parameters in HPV-positive HNSC tumor samples; binary definition of loss or gain.

**S7C** Logistic Regression for the prediction of immune infiltrate parameters in HPV-positive HNSC tumor samples; copy number level considered as continuous data.

#### **Table S8**

HPV-negative HNSC cell lines and corresponding CNV for different genomic regions.

**Table S9**

GSEA Analysis on HNSC cancer cell lines comparing cell lines with or without 9p21.3 loss (arm or focal), Pathways Enriched.

**Table S10**

GSEA Analysis on HNSC cancer cell lines comparing cell lines with or without 9p21.3 loss (arm or focal), Pathways Depleted.

**Table S11**

GSEA Analysis on HNSC cancer cell lines comparing cell lines with or without 3p14 loss (arm or focal), Pathways Enriched.

**Table S12**

GSEA Analysis on HNSC cancer cell lines comparing cell lines with or without 3p14 loss (arm or focal), Pathways Depleted.

**Table S13**

GSEA Analysis on HNSC cancer cell lines comparing cell lines with or without 9p loss, Pathways Enriched.

**Table S14**

GSEA Analysis on HNSC cancer cell lines comparing cell lines with or without 9p loss, Pathways Depleted.

**Table S15**

List of Aneuploidy-associated SASP genes and IFNA gene set.

**Table S16**

GSEA Analysis on TCGA HNSC comparing tumors with or without 9p21.3 loss (arm or focal), Pathways Enriched.

**Table S17**

GSEA Analysis on TCGA HNSC comparing tumors with or without 9p21.3 loss (arm or focal), Pathways Depleted.

**Table S18**

GSEA Analysis on TCGA HNSC comparing tumors with or without 9p loss, Pathways Enriched.

**Table S19**

GSEA Analysis on TCGA HNSC comparing tumors with or without 9p loss, Pathways Depleted.

**Table S20**

Association between SASP signature pathway and copy number alterations in HPV-negative HNSC cell lines.

**S20A** Logistic Regression for the prediction of SASP enrichment in HNSC cell lines (CCLE) - after separating arm-level and focal-level loss at 9p21.3

**S20B** Logistic Regression for the prediction of SASP enrichment in HNSC cell lines (CCLE) - after separating arm-level and focal-level loss at 3p14.

**Table S21**

GSEA Analysis on TCGA HNSC comparing tumors with or without 9p21.3 focal loss, Pathways Depleted.

**Table S22**

GSEA Analysis on HNSC cancer cell lines comparing cell lines with or without 9p21.3 focal loss, Pathways Depleted.

**Table S23**

GSEA Analysis (Hallmark gene sets) on TCGA HNSC comparing tumors with or without 9p loss, Pathways Depleted.

**Table S24**

GSEA Analysis (Hallmark gene sets) on HNSC cancer cell lines comparing cell lines with or without 9p loss, Pathways Depleted.

**Table S25**

Cox proportional hazards model for OCFS of the indicated parameters in Real-World Evidence Cohort.



**Table S1****S1A**

Selected patient characteristics and markers for oral precancer cohort.\*

| <b>N=188</b>                      |           |
|-----------------------------------|-----------|
| <b>Prior oral cancers, N (%)</b>  |           |
| No                                | 69 (37%)  |
| Yes                               | 119 (63%) |
| <b>Histology, N (%)</b>           |           |
| Hyperplasia                       | 68 (36%)  |
| Mild/moderate dysplasia           | 107 (57%) |
| Severe dysplasia                  | 13 (7%)   |
| <b>3p14 Loss, N (%)</b>           |           |
| No Loss                           | 105 (56%) |
| Loss                              | 82 (43%)  |
| <b>9p21.3 Loss, N (%)</b>         |           |
| No Loss                           | 76 (40%)  |
| Loss                              | 112 (60%) |
| <b>17p13.1 Loss, N (%)</b>        |           |
| No Loss                           | 62 (33%)  |
| Loss                              | 126 (67%) |
| <b>Chromosome 7 Gain, N (%)**</b> |           |
| No                                | 114 (61%) |
| Yes                               | 72 (38%)  |
| <b>Smoking, N (%)</b>             |           |
| Current                           | 23 (12%)  |
| Former                            | 71 (38%)  |
| <b>Alcohol, N (%)</b>             |           |
| Light drinker                     | 81 (43%)  |
| Moderate, Heavy drinkers          | 23 (12%)  |
| <b>Gender, N (%)</b>              |           |
| Male                              | 94 (50%)  |
| Female                            | 94 (50%)  |

\* See Results section for details

\*\*Missing values (N=2).

**S1B****Co-occurrence analysis of SCNAs in oral precancer**

| <b>Event 1</b>  | <b>Event 2</b>  | <b>p-Value Mutual Exclusivity</b> | <b>p-Value Co-occurrence</b> |
|-----------------|-----------------|-----------------------------------|------------------------------|
| 3p14 Loss       | 9p21.3 Loss     | 1                                 | 1.29302E-07                  |
| 3p14 Loss       | 17p13.1 Loss    | 0.9999976                         | 1.15549E-05                  |
| 9p21.3 Loss     | 17p13.1 Loss    | 0.9939178                         | 0.01424003                   |
| 3p14 Loss       | Chr 7 Gain      | 0.9999877                         | 4.64218E-05                  |
| 9p21.3 Loss     | Chr 7 Gain      | 0.9999911                         | 3.62777E-05                  |
| 17p13.1 Loss    | Chr 7 Gain      | 0.9974528                         | 0.006866455                  |
| Major risk loci | Minor risk loci | 0.9991201                         | 0.003799281                  |



**Table S3**  
Association between immune parameters and copy number alterations in HPV-negative HNSC tumor samples from TCGA.

Unless otherwise specified, '9p21.3 loss', '3p14 loss', or '17p13.1 loss' refer to the presence of a loss at this region irrespective of the length of the deletion (whether the loss encompasses the entire arm or is a focal event).

**S3A**  
Logistic Regression for the prediction of immune infiltrate parameters in HNSC tumor samples ; binary definition of loss or gain.  
Top and bottom 35% of the distributions were considered to divide the tumors into those with high or low levels of immune markers.  
Thresholded values were used to define loss and gain

| purely method/Pathology | $\beta$ coefficient | z value    | P< z        | FDR     | OR                  |
|-------------------------|---------------------|------------|-------------|---------|---------------------|
| CD8+                    | -0.3447693          | -0.8907451 | 0.373069598 | 0.73416 | 0.708584 binary     |
| 3p14 Loss               | -1.2851964          | -3.5119797 | 0.00044782  | 0.00226 | 0.051313 continuous |
| 9p21.3 Loss             | -0.4864328          | -1.0348338 | 0.3005979   | 0.73416 | 0.64816 binary      |
| Chr 7 Gain              | -0.4301541          | -0.990093  | 0.37341501  | 0.73416 | 0.650409 continuous |
| SCNA level              | -0.5920483          | -3.0591518 | 0.002219846 | 0.00549 | 0.553193 continuous |

**S3B**  
Logistic Regression for the prediction of immune infiltrate parameters in HNSC tumor samples ; copy number level considered as continuous variables.  
Top and bottom 35% of the distributions were considered to divide the tumors into those with high or low levels of immune markers.  
For each copy number event, we used copy number level after standardization.

| purely method/Pathology | $\beta$ coefficient | z value    | P< z         | FDR      | OR                  |
|-------------------------|---------------------|------------|--------------|----------|---------------------|
| CD8+                    | 0.5620057           | 2.6801579  | 0.007358744  | 0.0184   | 1.790779 continuous |
| 3p14 scale              | 0.9922856           | 4.125259   | 2.649420E-05 | 0.000125 | 2.697239 continuous |
| 9p21.3 scale            | -0.1904378          | -0.6542167 | 0.5126147    | 1.842    | 0.870213 continuous |
| Chr 7 scale             | -0.4613918          | -1.0757769 | 0.2860852    | 0.70878  | 0.630426 continuous |
| SCNA level              | -0.4925233          | -2.429203  | 0.01497931   | 0.025    | 0.611077 continuous |

**S3C**  
Logistic Regression for the prediction of CD8+ in HNSC tumor samples - after separating arm-level and focal-level loss at 9p21.3  
Top and bottom 35% of the distributions were considered to divide the tumors into those with high or low levels of immune markers.  
Distinction between tumors showing arm-only, focal-only events and a combination of both.

| purely method/Pathology       | $\beta$ coefficient | z value    | P< z        | FDR     | OR                  |
|-------------------------------|---------------------|------------|-------------|---------|---------------------|
| 9p21.3 Loss: ARM (N=80)       | -1.7946255          | -3.7209207 | 0.000198488 | 0.00002 | 0.186119 binary     |
| 9p21.3 Loss: FOCAL (N=40)     | -0.6307587          | -1.3710268 | 0.06053996  | 0.15085 | 0.450729 binary     |
| 9p21.3 Loss: ARM+FOCAL (N=15) | -0.9878614          | -1.9720706 | 0.04849153  | 0.10585 | 0.593975 binary     |
| 3p14 Loss                     | -0.2839986          | -0.7154122 | 0.4738768   | 0.76805 | 0.788051 binary     |
| SCNA level                    | -0.6306161          | -3.5184969 | 0.000433999 | 0.01085 | 0.529397 continuous |

**S3D**  
Logistic Regression for the prediction of CD8+ in HNSC tumor samples - after separating arm-level and focal-level loss at 3p14.  
Top and bottom 35% of the distributions were considered to divide the tumors into those with high or low levels of immune markers.  
Distinction between tumors showing arm-only, focal-only events and a combination of both.

| purely method/Pathology | $\beta$ coefficient | z value    | P< z        | FDR     | OR                  |
|-------------------------|---------------------|------------|-------------|---------|---------------------|
| 3p14 Loss: ARM Level    | -1.5614052          | -1.3802814 | 0.16750007  | 0.23201 | 0.570730 binary     |
| 3p14 Loss: FOCAL Level  | -0.6243176          | -1.3481234 | 0.17781706  | 0.23201 | 0.535207 binary     |
| 3p14 Loss: ARM+FOCAL    | -0.4484294          | -0.9842548 | 0.3242548   | 0.73416 | 0.598929 binary     |
| 9p21.3 Loss             | -1.2971362          | -3.6417872 | 0.000285127 | 0.00343 | 0.273133 binary     |
| SCNA level              | -0.6120982          | -3.3376742 | 0.000844827 | 0.01103 | 0.542212 continuous |

**S3E**  
Logistic Regression for the prediction of CD8+ in HNSC tumor samples - after separating arm-level and focal-level loss at 17p13.1  
Top and bottom 35% of the distributions were considered to divide the tumors into those with high or low levels of immune markers.  
Distinction between tumors showing arm-only, focal-only events and a combination of both.

| purely method/Pathology   | $\beta$ coefficient | z value    | P< z        | FDR      | OR                  |
|---------------------------|---------------------|------------|-------------|----------|---------------------|
| 17p13.1 Loss: ARM Level   | 0.2224102           | 0.4211548  | 0.6737787   | 1.41611  | 0.880097 binary     |
| 17p13.1 Loss: FOCAL Level | 0.0208666           | 0.0278069  | 0.9778139   | 0.78761  | 1.021085 binary     |
| 17p13.1 Loss: ARM+FOCAL   | -0.4484294          | -0.9842548 | 0.3242548   | 0.73416  | 0.598929 binary     |
| 9p21.3 Loss               | -1.39586102         | -4.0886441 | 4.37243E-05 | 1.09E-04 | 0.247894 binary     |
| SCNA level                | -0.1792939          | -0.3373242 | 1.45276E-05 | 7.25E-05 | 0.482094 continuous |

**S3F**  
Co-occurrence analysis of immune infiltrate parameters in HPV-neg HNSC tumor samples .

| Event 1      | Event 2      | p-Value | Mutual Exclusivity | p-Value  | Co-occurrence | FDR |
|--------------|--------------|---------|--------------------|----------|---------------|-----|
| 3p14 Loss    | 17p13.1 Loss | 1       | 3.56E-11           | 1.72E-11 |               |     |
| 9p21.3 Loss  | 17p13.1 Loss | 1       | 1.73E-06           | 1.04E-05 |               |     |
| 9p21.3 Loss  | 3p Am Loss   | 1       | 3.39E-08           | 5.09E-08 |               |     |
| 9p Am Loss   | 17p Am Loss  | 1       | 3.2E-11            | 1.72E-11 |               |     |
| 9p Am Loss   | 3p Am Loss   | 1       | 9.9999978          | 1.10E-05 |               |     |
| 9p Am Loss   | 17p Am Loss  | 1       | 0.9939966          | 1.86E-03 | 0.01186       |     |
| 3p14 Loss    | Chr 7 Gain   | 1       | 4.13E-01           | 4.13E-01 |               |     |
| 17p13.1 Loss | Chr 7 Gain   | 1       | 0.971026           | 6.72E-02 | 2.02E-01      |     |
| 9p21.3 Loss  | Chr 7 Gain   | 1       | 0.8313768          | 2.66E-01 | 3.99E-01      |     |

**S3G**  
Logistic Regression for the prediction of CD8+ in HNSC tumor samples - after separating arm-level and focal-level loss at 9p21.3  
Top and bottom 35% of the distributions were considered to divide the tumors into those with high or low levels of immune markers.  
Distinction between tumors showing arm-only, focal-only events and a combination of both.

| purely method/Pathology       | $\beta$ coefficient | z value    | P< z        | FDR     | OR                  |
|-------------------------------|---------------------|------------|-------------|---------|---------------------|
| 9p21.3 Loss: ARM (N=80)       | -1.5977906          | -3.3393469 | 0.000987566 | 0.00002 | 0.208905 binary     |
| 9p21.3 Loss: FOCAL (N=40)     | -0.7797818          | -1.6979718 | 0.0948098   | 0.23201 | 0.591311 binary     |
| 9p21.3 Loss: ARM+FOCAL (N=15) | -0.3383003          | -0.7414703 | 0.4583662   | 0.78761 | 1.402662 binary     |
| 3p14 Loss                     | -0.2852683          | -0.7598933 | 0.4486989   | 0.56141 | 0.715182 binary     |
| SCNA level                    | -0.7397484          | -2.4748091 | 0.0130159   | 0.03405 | 0.450461 continuous |

**S3H**  
Logistic Regression for the prediction of CD8+ in HNSC tumor samples - after separating arm-level and focal-level loss at 3p14.  
Top and bottom 35% of the distributions were considered to divide the tumors into those with high or low levels of immune markers.  
Distinction between tumors showing arm-only, focal-only events and a combination of both.

| purely method/Pathology        | $\beta$ coefficient | z value    | P< z       | FDR       | OR                  |
|--------------------------------|---------------------|------------|------------|-----------|---------------------|
| 9p21.3 copy number ARM Level   | 0.1620283           | 3.0858467  | 0.00229734 | 0.06033   | 2.050744 continuous |
| 9p21.3 copy number FOCAL Level | -0.0473708          | -0.9319286 | 0.3527065  | 0.763E-01 | 0.853728 continuous |
| 3p14 copy number               | 0.0426939           | 0.9278958  | 0.3527065  | 0.763E-01 | 0.853728 continuous |
| SCNA level                     | 0.7781581           | 1.4634373  | 0.1398505  | 0.125E-04 | 0.495251 continuous |

**S3I**  
Logistic Regression for the prediction of CD8+ in HNSC tumor samples - after separating arm-level and focal-level loss at 17p13.1  
Top and bottom 35% of the distributions were considered to divide the tumors into those with high or low levels of immune markers.  
Distinction between tumors showing arm-only, focal-only events and a combination of both.

| purely method/Pathology   | $\beta$ coefficient | z value    | P< z        | FDR      | OR                 |
|---------------------------|---------------------|------------|-------------|----------|--------------------|
| 17p13.1 Loss: ARM Level   | -0.3861063          | -0.8607013 | 0.38700603  | 0.2272   | 0.617594 binary    |
| 17p13.1 Loss: FOCAL Level | -0.2849578          | -0.6095738 | 0.542144776 | 0.542144 | 0.702846 binary    |
| 17p13.1 Loss: ARM+FOCAL   | -0.6390007          | -1.3957758 | 0.338175841 | 0.2272   | 0.504796 binary    |
| 9p21.3 Loss               | -1.0420025          | -2.257214  | 0.0249828   | 0.007874 | 0.351973 binary    |
| SCNA level                | -0.8093191          | -4.3246247 | 1.52792E-05 | 6.64E-05 | 0.45161 continuous |

**S3J**  
Logistic Regression for the prediction of CD8+ in HNSC tumor samples - after separating arm-level and focal-level loss at 3p14.  
Top and bottom 35% of the distributions were considered to divide the tumors into those with high or low levels of immune markers.  
Distinction between tumors showing arm-only, focal-only events and a combination of both.

| purely method/Pathology        | $\beta$ coefficient | z value    | P< z       | FDR     | OR                  |
|--------------------------------|---------------------|------------|------------|---------|---------------------|
| 9p21.3 copy number ARM Level   | 0.6263493           | 2.1662478  | 0.03003883 | 0.04089 | 1.870788 continuous |
| 9p21.3 copy number FOCAL Level | -0.1760768          | -0.3638438 | 0.7160768  | 1.72606 | 0.853728 continuous |
| 3p14 copy number               | 0.3494518           | 2.3618369  | 0.0184553  | 0.03639 | 1.412929 continuous |

**S3K**  
Logistic Regression for the prediction of CD8+ in HNSC tumor samples - after separating arm-level and focal-level loss at 17p13.1  
Top and bottom 35% of the distributions were considered to divide the tumors into those with high or low levels of immune markers.  
Distinction between tumors showing arm-only, focal-only events and a combination of both.

| purely method/Pathology   | $\beta$ coefficient | z value    | P< z        | FDR      | OR                 |
|---------------------------|---------------------|------------|-------------|----------|--------------------|
| 17p13.1 Loss: ARM Level   | -0.12487            | -0.26399   | 0.791389    | 1.688    | 0.88012 binary     |
| 17p13.1 Loss: FOCAL Level | 0.07095             | 0.095      | 0.9244      | 0.9244   | 1.073288 binary    |
| 17p13.1 Loss: ARM+FOCAL   | -0.6390007          | -1.3957758 | 0.338175841 | 0.2272   | 0.504796 binary    |
| 9p21.3 Loss               | -1.0420025          | -2.257214  | 0.0249828   | 0.007874 | 0.351973 binary    |
| SCNA level                | -0.8093191          | -4.3246247 | 1.52792E-05 | 6.64E-05 | 0.45161 continuous |

**S3L**  
Logistic Regression for the prediction of CD8+ in HNSC tumor samples - after separating arm-level and focal-level loss at 3p14.  
Top and bottom 35% of the distributions were considered to divide the tumors into those with high or low levels of immune markers.  
Distinction between tumors showing arm-only, focal-only events and a combination of both.

| purely method/Pathology        | $\beta$ coefficient | z value    | P< z      | FDR      | OR                  |
|--------------------------------|---------------------|------------|-----------|----------|---------------------|
| 9p21.3 copy number ARM Level   | 0.0826228           | 0.56091    | 0.574859  | 0.574859 | 1.086132 continuous |
| 9p21.3 copy number FOCAL Level | -0.1760768          | -0.3638438 | 0.7160768 | 1.72606  | 0.853728 continuous |
| 3p14 copy number               | 0.3494518           | 2.3618369  | 0.0184553 | 0.03639  | 1.412929 continuous |



**Table S4**

**Association between immune parameters and copy number alterations in HPV-negative oral tumor samples from TCGA.**

Unless otherwise specified, '9p21.3 loss', '3p14 loss' or '17p13.1 loss' refer to the presence of a loss at this region irrespective of the length of the deletion (whether the loss encompasses the entire arm or is a focal event).'

**S4A**

**Logistic Regression for the prediction of immune infiltrate parameters in oral tumor samples**

Top and bottom 35% of the distributions were considered to divide the tumors into those with high or low levels of immune markers.

Binary definition of loss or gain.

**purity method=Pathology**

For each copy number event, we used copy number values after standardization.

**purity method=Pathology**

|                     | $\beta$ coefficient | z value   | Pr(> z ) | FDR      | OR       |                     | $\beta$ coefficient | z value   | Pr(> z ) | FDR      | OR       |
|---------------------|---------------------|-----------|----------|----------|----------|---------------------|---------------------|-----------|----------|----------|----------|
| <b>CD8+</b>         |                     |           |          |          |          | <b>CD8+</b>         |                     |           |          |          |          |
| 3p14 Loss           | -0.0927768          | -0.181646 | 8.56E-01 | 8.56E-01 | 0.911397 | 3p14 scale          | 0.6456285           | 2.152065  | 3.14E-02 | 5.23E-02 | 1.907185 |
| 9p21.3 Loss         | -2.0425244          | -3.970332 | 7.18E-05 | 3.59E-04 | 0.129701 | 9p21.3 scale        | 1.5603175           | 4.257302  | 2.07E-05 | 1.04E-04 | 4.760332 |
| 17p13.1 Loss        | -0.9482032          | -1.15309  | 2.49E-01 | 4.03E-01 | 0.387437 | 17p13.1 scale       | -0.3221382          | -1.117982 | 2.64E-01 | 3.30E-01 | 0.724598 |
| Chr 7 Gain          | 0.7283416           | 0.990505  | 3.22E-01 | 4.03E-01 | 2.071642 | Chr 7 scale         | -0.2573763          | -0.709606 | 4.78E-01 | 4.78E-01 | 0.773077 |
| SCNA level          | -0.9097892          | -3.296963 | 9.77E-04 | 2.44E-03 | 0.402609 | SCNA level          | -0.6239998          | -2.166146 | 3.03E-02 | 5.23E-02 | 0.535797 |
| <b>CD3+</b>         |                     |           |          |          |          | <b>CD3+</b>         |                     |           |          |          |          |
| 3p14 Loss           | -0.4973584          | -1.013056 | 0.311033 | 0.311033 | 0.608135 | 3p14 scale          | 0.94246865          | 3.422997  | 0.000619 | 0.003097 | 2.566309 |
| 9p21.3 Loss         | -1.6183061          | -3.2009   | 0.00137  | 0.003425 | 0.198234 | 9p21.3 scale        | 0.45085749          | 2.285872  | 0.022262 | 0.037103 | 1.569658 |
| 17p13.1 Loss        | -1.4036496          | -1.516095 | 0.129495 | 0.215825 | 0.245699 | 17p13.1 scale       | 0.03674168          | 0.147436  | 0.882788 | 0.882788 | 1.037425 |
| Chr 7 Gain          | 0.7122948           | 1.015339  | 0.309944 | 0.311033 | 2.038664 | Chr 7 scale         | -0.1710354          | -0.551452 | 0.581324 | 0.726655 | 0.842792 |
| SCNA level          | -0.9353222          | -3.304707 | 0.000951 | 0.003425 | 0.392459 | SCNA level          | -0.64705579         | -2.364806 | 0.01804  | 0.037103 | 0.523585 |
| <b>CD68+</b>        |                     |           |          |          |          | <b>CD68+</b>        |                     |           |          |          |          |
| 3p14 Loss           | 0.4460938           | 0.940225  | 0.347102 | 0.433878 | 1.562198 | 3p14 scale          | -0.19870062         | -0.854913 | 0.392599 | 0.490749 | 0.819795 |
| 9p21.3 Loss         | -0.6193774          | -1.442211 | 0.149243 | 0.248738 | 0.538279 | 9p21.3 scale        | -0.09582344         | -0.545602 | 0.58534  | 0.58534  | 0.908624 |
| 17p13.1 Loss        | -0.9026873          | -1.815994 | 0.069371 | 0.248738 | 0.405479 | 17p13.1 scale       | 0.63795188          | 2.999854  | 0.002701 | 0.013505 | 1.892601 |
| Chr 7 Gain          | 0.2935597           | 0.443107  | 0.657689 | 0.657689 | 1.341193 | Chr 7 scale         | 0.38044836          | 1.306076  | 0.191527 | 0.319212 | 1.46294  |
| SCNA level          | -0.3435666          | -1.463083 | 0.143445 | 0.248738 | 0.709236 | SCNA level          | -0.48139622         | -2.005555 | 0.044904 | 0.112259 | 0.61792  |
| <b>Immune Score</b> |                     |           |          |          |          | <b>Immune Score</b> |                     |           |          |          |          |
| 3p14 Loss           | -0.07727523         | -0.147538 | 0.882707 | 0.882707 | 0.925635 | 3p14 scale          | 0.71445954          | 2.36427   | 0.018066 | 0.045164 | 2.043082 |
| 9p21.3 Loss         | -1.84823056         | -3.607866 | 0.000309 | 0.001544 | 0.157501 | 9p21.3 scale        | 1.390649            | 4.036392  | 5.43E-05 | 0.000271 | 4.017457 |
| 17p13.1 Loss        | -1.12998716         | -1.552851 | 0.120459 | 0.200765 | 0.323037 | 17p13.1 scale       | -0.07017032         | -0.254492 | 0.799115 | 0.799115 | 0.932235 |
| Chr 7 Gain          | 0.94756411          | 1.30175   | 0.193002 | 0.241252 | 2.579419 | Chr 7 scale         | -0.09509775         | -0.273664 | 0.784343 | 0.799115 | 0.909284 |
| SCNA level          | -0.96903058         | -3.392153 | 0.000693 | 0.001734 | 0.379451 | SCNA level          | -0.63000651         | -2.192166 | 0.028368 | 0.047279 | 0.532588 |

**S4B**

**Logistic Regression for the prediction of CD8+ in oral tumor samples - after separating arm-level and focal-level loss at 9p21.3**

Top and bottom 35% of the distributions were considered to divide the tumors into those with high or low levels of immune markers.

Distinction between tumors showing arm-only, focal-only events and a combination of both.

Binary definition of loss or gain.

**purity method=Pathology**

For each copy number event, we used copy number values after standardization.

**purity method=Pathology**

|                               | $\beta$ coefficient | z value   | Pr(> z ) | FDR      | OR       |                                | $\beta$ coefficient | z value   | Pr(> z ) | FDR      | OR       |
|-------------------------------|---------------------|-----------|----------|----------|----------|--------------------------------|---------------------|-----------|----------|----------|----------|
| 9p21.3 Loss: ARM (N=80)       | -3.7291933          | -3.45977  | 0.000541 | 0.002703 | 0.024012 | 9p21.3 copy number ARM Level   | 2.3099844           | 4.450053  | 8.58E-06 | 3.43E-05 | 10.07427 |
| 9p21.3 Loss: FOCAL (N=40)     | -0.9835497          | -1.801873 | 0.071565 | 0.119276 | 0.373981 | 9p21.3 copy number FOCAL Level | 0.412355            | 1.451957  | 1.47E-01 | 1.96E-01 | 1.510371 |
| 9p21.3 Loss: ARM+FOCAL (N=15) | -16.6563876         | -0.012475 | 0.990046 | 0.990047 | 5.84E-08 | 3p14 copy number               | 0.3604761           | 1.216953  | 2.24E-01 | 2.24E-01 | 1.434012 |
| 3p14 Loss                     | -0.1119033          | -0.229746 | 0.818289 | 0.990047 | 0.894131 | SCNA level                     | -0.7464163          | -2.484486 | 1.30E-02 | 2.60E-02 | 0.474062 |
| SCNA level                    | -0.7339896          | -2.826584 | 0.004705 | 0.011762 | 0.47999  |                                |                     |           |          |          |          |

**S4C**

**Logistic Regression for the prediction of CD8+ in oral tumor samples - after separating arm-level and focal-level loss at 3p14.**

Top and bottom 35% of the distributions were considered to divide the tumors into those with high or low levels of immune markers.

Distinction between tumors showing arm-only, focal-only events and a combination of both.

Binary definition of loss or gain.

**purity method=Pathology**

For each copy number event, we used copy number values after standardization.

**purity method=Pathology**

|                        | $\beta$ coefficient | z value   | Pr(> z ) | FDR      | OR       |                              | $\beta$ coefficient | z value  | Pr(> z ) | FDR      | OR       |
|------------------------|---------------------|-----------|----------|----------|----------|------------------------------|---------------------|----------|----------|----------|----------|
| 3p14 Loss: ARM Level   | -0.5338593          | -1.030897 | 3.03E-01 | 3.03E-01 | 0.586338 | 3p14 copy number ARM Level   | 0.8072066           | 1.728135 | 8.40E-02 | 1.12E-01 | 2.241637 |
| 3p14 Loss: FOCAL Level | -0.5939564          | -1.031031 | 3.03E-01 | 3.03E-01 | 0.552138 | 3p14 copy number FOCAL Level | 0.4955731           | 1.083639 | 2.79E-01 | 2.79E-01 | 1.641439 |
| 3p14 Loss: ARM+FOCAL   | -1.4998566          | -1.217132 | 2.24E-01 | 3.03E-01 | 0.223162 | 9p21.3 copy number           | 1.4691859           | 4.356877 | 1.32E-05 | 5.28E-05 | 4.345696 |
| 9p21.3 Loss            | -2.0023121          | -3.988118 | 6.66E-05 | 3.33E-04 | 0.135023 | SCNA level                   | -0.7858527          | -2.75483 | 5.87E-03 | 1.17E-02 | 0.455731 |
| SCNA level             | -0.766696           | -3.062019 | 2.20E-03 | 5.50E-03 | 0.464545 |                              |                     |          |          |          |          |

**S4D**

**Logistic Regression for the prediction of CD8+ in oral tumor samples - after separating arm-level and focal-level loss at 17p13.1.**

Top and bottom 35% of the distributions were considered to divide the tumors into those with high or low levels of immune markers.

Distinction between tumors showing arm-only, focal-only events and a combination of both.

Binary definition of loss or gain.

**purity method=Pathology**

For each copy number event, we used copy number values after standardization.

**purity method=Pathology**

|                           | $\beta$ coefficient | z value   | Pr(> z ) | FDR      | OR       |                                 | $\beta$ coefficient | z value   | Pr(> z ) | FDR      | OR       |
|---------------------------|---------------------|-----------|----------|----------|----------|---------------------------------|---------------------|-----------|----------|----------|----------|
| 17p13.1 Loss: ARM Level   | -0.6573481          | -0.716571 | 4.74E-01 | 6.91E-01 | 0.518224 | 17p13.1 copy number ARM Level   | -0.2824384          | -1.091784 | 2.75E-01 | 3.67E-01 | 0.753943 |
| 17p13.1 Loss: FOCAL Level | 0.6678774           | 0.593938  | 5.53E-01 | 6.91E-01 | 1.950094 | 17p13.1 copy number FOCAL Level | 0.1523539           | 0.478366  | 6.32E-01 | 6.32E-01 | 1.164572 |
| 17p13.1 Loss: ARM+FOCAL   | -16.085137          | -0.016596 | 9.87E-01 | 9.87E-01 | 1.03E-07 | 9p21.3 copy number              | 1.7523208           | 4.896996  | 9.73E-07 | 3.89E-06 | 5.767973 |
| 9p21.3 Loss               | -2.1347942          | -4.270594 | 1.95E-05 | 9.75E-05 | 0.118269 | SCNA level                      | -1.0356635          | -4.436121 | 9.16E-06 | 1.83E-05 | 0.354991 |
| SCNA level                | -0.9148237          | -3.919697 | 8.87E-05 | 2.22E-04 | 0.400587 |                                 |                     |           |          |          |          |

**Table S5****Lasso-based prediction model of Immune Score in HNSC tumor samples (TCGA). Variable Selection.**

| <b>Parameters</b> | <b><math>\beta</math> coefficient</b> | <b>Pvalue</b> |
|-------------------|---------------------------------------|---------------|
| Chr 1             | 0                                     | NA            |
| Chr 2             | 0                                     | NA            |
| Chr 3             | 0                                     | NA            |
| Chr 4             | 0                                     | NA            |
| Chr 5             | 0                                     | NA            |
| Chr 6             | 0                                     | NA            |
| Chr 7             | 0                                     | NA            |
| Chr 8             | 0                                     | NA            |
| Chr 9             | -0.72(0.18,1.26)                      | 0.0078        |
| Chr 10            | -0.22(-1,1.44)                        | 0.7209        |
| Chr 11            | 0                                     | NA            |
| Chr 12            | 0                                     | NA            |
| Chr 13            | 0                                     | NA            |
| Chr 14            | 0                                     | NA            |
| Chr 15            | 0                                     | NA            |
| Chr 16            | 0                                     | NA            |
| Chr 17            | 0                                     | NA            |
| Chr 18            | 0                                     | NA            |
| Chr 19            | 0                                     | NA            |
| Chr 20            | 0                                     | NA            |
| Chr 21            | 0                                     | NA            |
| Chr 22            | 0.24(-0.78,0.3)                       | 0.3764        |
| 1p Arm            | 0                                     | NA            |
| 2p Arm            | 0                                     | NA            |
| 3p Arm            | 0                                     | NA            |
| 4p Arm            | 0                                     | NA            |
| 5p Arm            | 0                                     | NA            |
| 6p Arm            | -0.43(-0.27,1.13)                     | 0.2108        |
| 7p Arm            | 0                                     | NA            |
| 8p Arm            | 0                                     | NA            |
| 9p Arm            | -1.13(0.47,1.79)                      | 7.00E-04      |
| 10p Arm           | 0                                     | NA            |
| 11p Arm           | 0                                     | NA            |
| 12p Arm           | 0                                     | NA            |
| 16p Arm           | 0                                     | NA            |
| 17p Arm           | 0                                     | NA            |
| 18p Arm           | 0                                     | NA            |
| 19p Arm           | 0                                     | NA            |
| 20p Arm           | 0                                     | NA            |
| 1q Arm            | 0                                     | NA            |
| 2q Arm            | 0                                     | NA            |
| 3q Arm            | 0                                     | NA            |
| 4q Arm            | 0                                     | NA            |
| 5q Arm            | 0                                     | NA            |
| 6q Arm            | 0                                     | NA            |
| 7q Arm            | -0.83(-3.57,1.91)                     | 0.5445        |
| 8q Arm            | 0                                     | NA            |
| 9q Arm            | 0                                     | NA            |
| 10q Arm           | 0                                     | NA            |
| 11q Arm           | 0                                     | NA            |
| 12q Arm           | 0                                     | NA            |
| 16q Arm           | 0                                     | NA            |
| 17q Arm           | 0                                     | NA            |
| 18q Arm           | 0                                     | NA            |
| 19q Arm           | 0                                     | NA            |
| 20q Arm           | 0                                     | NA            |
| SCNA level        | -1.12(-1.6,-0.64)                     | 0             |

---

**Table S6**

Association between immune parameters and copy number alterations and other parameters in HPV-negative HNSC tumor samples from TCGA. Unless otherwise specified, '9p21.3 loss', '3p14 loss' or '17p13.1 loss' refer to the presence of a loss at this region irrespective of the length of the deletion (whether the loss encompasses the entire arm or is a focal event).

**S6A**

Logistic Regression for the prediction of CD8+ in HNSC tumor samples after considering the tumor stage.

Top and bottom 35% of the distributions were considered to divide the tumors into those with high or low levels of immune markers.

purity method=ABSOLUTE

stage I or II (N=76)

|                                     | $\beta$ coefficient | z value    | Pr(> z ) | OR                  |
|-------------------------------------|---------------------|------------|----------|---------------------|
| 3p14 Loss (samples with loss=49)    | 0.1751775           | 0.2176969  | 0.827665 | 1.191458 binary     |
| 9p21.3 Loss (samples with loss=33)  | -1.6968636          | -2.3427388 | 0.019143 | 0.183257 binary     |
| 17p13.1 Loss (samples with loss=20) | -1.214868           | -1.3559012 | 0.175131 | 0.296749 binary     |
| SCNA level                          | -0.5542126          | -1.2550551 | 0.209459 | 0.574524 continuous |

stage III (N=65)

|                                     | $\beta$ coefficient | z value    | Pr(> z ) | OR                  |
|-------------------------------------|---------------------|------------|----------|---------------------|
| 3p14 Loss (samples with loss=50)    | -1.538657           | -1.0086105 | 0.313161 | 0.214669 binary     |
| 9p21.3 Loss (samples with loss=25)  | -2.064968           | -1.9344592 | 0.053057 | 0.126822 binary     |
| 17p13.1 Loss (samples with loss=16) | 2.017373            | 1.8246672  | 0.068051 | 7.518548 binary     |
| SCNA level                          | -1.353899           | -1.8978269 | 0.057719 | 0.258231 continuous |

stage IV (N=163)

|                                     | $\beta$ coefficient | z value    | Pr(> z ) | OR                  |
|-------------------------------------|---------------------|------------|----------|---------------------|
| 3p14 Loss (samples with loss=137)   | -0.48979533         | -0.7251495 | 0.46836  | 0.612752 binary     |
| 9p21.3 Loss (samples with loss=77)  | -1.77733416         | -3.8753118 | 0.000106 | 0.169088 binary     |
| 17p13.1 Loss (samples with loss=32) | -0.00592329         | -0.0106613 | 0.991494 | 0.994094 binary     |
| SCNA level                          | -0.29755493         | -1.1531567 | 0.248846 | 0.742632 continuous |

**S6B**

Logistic Regression for the prediction of CD8+ in HNSC tumor samples after considering the TP53 status.

Top and bottom 35% of the distributions were considered to divide the tumors into those with high or low levels of immune markers.

purity method=ABSOLUTE

TP53 WT (N=22) (stage I or II)

|             | $\beta$ coefficient | z value    | Pr(> z ) | OR                  |
|-------------|---------------------|------------|----------|---------------------|
| 3p14 Loss   | -16.021672          | -0.004619  | 0.996315 | 1.1E-07 binary      |
| 9p21.3 Loss | -0.70451            | -0.4432798 | 0.657563 | 0.494351 binary     |
| SCNA level  | -2.565948           | -1.3362557 | 0.181466 | 0.076846 continuous |

TP53 Mut (N=33) (stage I or II)

|             | $\beta$ coefficient | z value    | Pr(> z ) | OR                  |
|-------------|---------------------|------------|----------|---------------------|
| 3p14 Loss   | -1.0983191          | -0.7301274 | 0.465312 | 0.333431 binary     |
| 9p21.3 Loss | -2.5883793          | -2.4649196 | 0.013704 | 0.075142 binary     |
| SCNA level  | -0.2980467          | -0.5378871 | 0.590655 | 0.742267 continuous |

**S6C**

Pearson's correlation analysis between CD8+/CD3+ and 9p arm loss in HNSC tumor samples after considering the TP53 status.

purity method=ABSOLUTE

TP53 WT (N=22) (stage I or II)

|                   | cor  | p-value | FDR             |
|-------------------|------|---------|-----------------|
| CD8+ ~9p Arm Loss | 0.41 | 0.06    | 0.12 continuous |
| CD3+ ~9p Arm Loss | 0.32 | 0.15    | 0.3 continuous  |

TP53 Mut (N=33) (stage I or II)

|                   | cor  | p-value | FDR              |
|-------------------|------|---------|------------------|
| CD8+ ~9p Arm Loss | 0.51 | 0.002   | 0.004 continuous |
| CD3+ ~9p Arm Loss | 0.36 | 0.03    | 0.06 continuous  |

**S6D**

Wilcoxon signed rank test between CD8+/CD3+ and 9p arm loss/9p21.3 loss in HNSC tumor samples after considering the TP53 status.

purity method=ABSOLUTE

TP53 WT (N=70) (stage I ~ IV)

|                         | p-value | FDR       |
|-------------------------|---------|-----------|
| CD8+ ~9p Arm Loss       | 0.00446 | 0.01784   |
| CD8+ ~9p21.3 focal Loss | 0.127   | 0.1693333 |
| CD3+ ~9p Arm Loss       | 0.0563  | 0.1126    |
| CD3+ ~9p21.3 focal Loss | 0.309   | 0.309     |

TP53 Mut (N=146) (stage I ~ IV)

|                         | p-value | FDR     |
|-------------------------|---------|---------|
| CD8+ ~9p Arm Loss       | 0.00286 | 0.01144 |
| CD8+ ~9p21.3 focal Loss | 0.864   | 0.864   |
| CD3+ ~9p Arm Loss       | 0.0194  | 0.0388  |
| CD3+ ~9p21.3 focal Loss | 0.755   | 0.864   |

Table S7

## Relationship between Immune Markers and SCNA Events in HPV-positive HNSC (N=36)

Unless otherwise specified, '9p21.3 loss', '3p14 loss' or '17p13.1 loss' refer to the presence of a loss at this region irrespective of the length of the deletion (whether the loss encompasses the entire arm or is a focal event).

## S7A

## Comparison of the frequencies of different copy number events in HPV positive and negative HNSC

| Events                           | Frequency in HPV positive HNSC (oropharynx, N=36) | Frequency in HPV negative HNSC (all, N=343) | Frequency in HPV negative HNSC (oral pharynx, N=232) |
|----------------------------------|---------------------------------------------------|---------------------------------------------|------------------------------------------------------|
| 17p13.1 Loss                     | 0.167                                             | 0.167                                       | 0.138                                                |
| 3p14 Loss                        | 0.306                                             | 0.558                                       | 0.621                                                |
| 9p21.3 Loss                      | 0.056                                             | 0.367                                       | 0.388                                                |
| 17p13.1 Focal Loss               | 0.028                                             | 0.027                                       | 0.031                                                |
| 3p14 Focal Loss                  | 0.139                                             | 0.039                                       | 0.022                                                |
| 9p21.3 Focal Loss                | 0                                                 | 0.116                                       | 0.094                                                |
| 3p Arm Loss                      | 0.139                                             | 0.388                                       | 0.406                                                |
| 9p Arm Loss                      | 0.056                                             | 0.26                                        | 0.281                                                |
| 9p Arm Gain                      | 0.121                                             | 0.125                                       | 0.137                                                |
| 17p Arm Loss                     | 0.167                                             | 0.122                                       | 0.138                                                |
| Chr 7 Gain                       | 0                                                 | 0.125                                       | 0.08                                                 |
| Average number of arm-level Gain | 4.69                                              | 5.05                                        | 4.46                                                 |
| Average number of arm-level Loss | 3.18                                              | 4.74                                        | 4.12                                                 |

## S7B

## Logistic Regression for the prediction of immune infiltrate parameters in HPV-positive HNSC tumor samples; binary definition of loss or gain

Thresholded values were used to define Loss and Gain in HPV-positive samples

## HPV positive HNSC (oropharynx)

| CD8+         | $\beta$ coefficient | z value   | Pr(> z ) | OR                              |
|--------------|---------------------|-----------|----------|---------------------------------|
| 3p14 Loss    |                     | 0.5177    | 0.537    | 0.592 1.6781634 binary          |
| 9p21.3 Loss  |                     | -35.4044  | -0.007   | 0.994 4.208E-16 binary          |
| 17p13.1 Loss |                     | 18.0518   | 0.005    | 0.996 69150787 binary           |
| Chr 7 Gain   | NA                  | NA        | NA       | NA binary                       |
| SCNA level   |                     | 0.2352    | 0.443    | 0.658 1.2651618 continuous<br>1 |
| CD3+         | $\beta$ coefficient | z value   | Pr(> z ) | OR                              |
| 3p14 Loss    |                     | -0.02513  | -0.025   | 0.98 0.9751831 binary           |
| 9p21.3 Loss  |                     | -17.62253 | -0.006   | 0.995 2.221E-08 binary          |
| 17p13.1 Loss |                     | -0.31789  | -0.204   | 0.838 0.7276828 binary          |
| Chr 7 Gain   | NA                  | NA        | NA       | NA binary                       |
| SCNA level   |                     | -0.31853  | -0.568   | 0.57 0.7272173 continuous<br>1  |
| CD68+        | $\beta$ coefficient | z value   | Pr(> z ) | OR                              |
| 3p14 Loss    |                     | -0.34485  | -0.371   | 0.711 0.7083266 binary          |
| 9p21.3 Loss  |                     | -16.25612 | -0.007   | 0.995 8.711E-08 binary          |
| 17p13.1 Loss |                     | -0.48031  | -0.405   | 0.685 0.6185916 binary          |
| Chr 7 Gain   | NA                  | NA        | NA       | NA binary                       |
| SCNA level   |                     | -0.92103  | -1.474   | 0.141 0.3981088 continuous      |

## S7C

## Logistic Regression for the prediction of immune infiltrate parameters in HPV-positive HNSC tumor samples; copy number level considered as continuous data.

For each copy number event (HPV-positive), we used copy number values after standardization.

## HPV positive HNSC (oropharynx)

| CD8+          | $\beta$ coefficient | z value      | Pr(> z )     | OR                              |
|---------------|---------------------|--------------|--------------|---------------------------------|
| 3p14 scale    |                     | 0.009591503  | 0.022416157  | 0.982116 1.0096376 continuous   |
| 9p21.3 scale  |                     | 1.261262916  | 1.339749544  | 0.1803268 3.5298766 continuous  |
| 17p13.1 scale |                     | -0.182965451 | -0.303090653 | 0.7618208 0.8327969 continuous  |
| Chr 7 scale   |                     | -3.988996857 | -0.006119591 | 0.9951173 0.0185183 continuous  |
| SCNA level    |                     | -0.183671061 | -0.34096679  | 0.7331286 0.8322095 continuous  |
| CD3+          | $\beta$ coefficient | z value      | Pr(> z )     | OR                              |
| 3p14 scale    |                     | 0.2581585    | 0.49707339   | 0.6191373 1.294544 continuous   |
| 9p21.3 scale  |                     | 0.2347384    | 0.498746708  | 0.6179578 1.2645779 continuous  |
| 17p13.1 scale |                     | 1.0354722    | 1.081391702  | 0.2795229 2.8164358 continuous  |
| Chr 7 scale   |                     | -4.7208476   | -0.00677584  | 0.9945937 0.0089076 continuous  |
| SCNA level    |                     | -0.6893639   | -0.985145189 | 0.3245528 0.5018952 continuous  |
| CD68+         | $\beta$ coefficient | z value      | Pr(> z )     | OR                              |
| 3p14 scale    |                     | 0.1582568    | 0.342368875  | 0.73207331 1.171467 continuous  |
| 9p21.3 scale  |                     | 1.1535477    | 0.976983156  | 0.32857749 3.1694171 continuous |
| 17p13.1 scale |                     | 0.2566075    | 0.490022554  | 0.62411794 1.2925377 continuous |
| Chr 7 scale   |                     | -4.2568355   | -0.006530487 | 0.99478946 0.0141671 continuous |
| SCNA level    |                     | -1.2051899   | -1.656786082 | 0.09756273 0.2996351 continuous |



Table S8

HPV-negative HNSC cell lines and corresponding CNV for different genomic regions

| CCLE name                                  | 3p Arm cnv | 9p Arm cnv | 17p Arm cnv | 17p13.1 cnv | 3p14 cnv | 9p21.3 cnv | TP53 mutation | SASP_enrichment |
|--------------------------------------------|------------|------------|-------------|-------------|----------|------------|---------------|-----------------|
| SCC9_UPPER_AERODIGESTIVE_TRACT             | 0          | -0.614     | 0           | 0.559       | -0.645   | -0.693     | 0             | 0.138674957     |
| SCC25_UPPER_AERODIGESTIVE_TRACT            | -0.504     | -0.841     | -0.009      | 0.24        | -0.82    | -0.859     | 1             | 0.311574821     |
| DETROIT562_UPPER_AERODIGESTIVE_TRACT       | -0.638     | -0.586     | 0.059       | 0.687       | -0.648   | -0.628     | 1             | 0.229371271     |
| BICR31_UPPER_AERODIGESTIVE_TRACT           | -0.888     | -0.438     | -0.264      | -0.264      | -0.888   | -0.59      | 1             | 0.299130188     |
| SCC4_UPPER_AERODIGESTIVE_TRACT             | -0.748     | -0.437     | -0.356      | -0.356      | -0.748   | -0.437     | 1             | 0.24427235      |
| SCC15_UPPER_AERODIGESTIVE_TRACT            | 0.083      | -0.409     | 0.929       | 0.955       | -0.46    | -0.443     | 1             | 0.403180505     |
| BICR6_UPPER_AERODIGESTIVE_TRACT            | -0.586     | -0.606     | 0           | -0.049      | -0.673   | -0.606     | 1             | 0.154112043     |
| HSC2_UPPER_AERODIGESTIVE_TRACT             | -0.276     | 0.105      | 0.91        | 0.91        | -0.276   | 0.105      | 1             | 0.269425399     |
| SNU46_UPPER_AERODIGESTIVE_TRACT            | -0.523     | 0          | 0.624       | 0.689       | -0.523   | -0.018     | 1             | 0.024359176     |
| BICR16_UPPER_AERODIGESTIVE_TRACT           | -0.596     | 0.178      | -0.223      | 0.371       | -0.596   | -0.53      | 1             | 0.162163423     |
| CAL33_UPPER_AERODIGESTIVE_TRACT            | 0.005      | 0          | 0           | -0.017      | -0.997   | 0.015      | 1             | 0.2549407       |
| HSC4_UPPER_AERODIGESTIVE_TRACT             | 0.402      | 0.464      | 0.498       | 0.498       | -0.113   | 1.095      | 1             | 0.158259287     |
| BHY_UPPER_AERODIGESTIVE_TRACT              | -0.274     | 0.635      | -0.25       | -0.392      | -0.274   | 0.528      | 1             | 0.285596712     |
| SNU1076_UPPER_AERODIGESTIVE_TRACT          | -0.576     | 0.071      | -0.326      | -0.326      | -0.576   | -0.951     | 1             | 0.20324502      |
| PECAPJ34CLONEC12_UPPER_AERODIGESTIVE_TRACT | 0.011      | 0          | 0.879       | -0.094      | -0.978   | -0.027     | 1             | 0.223535876     |
| SNU1041_UPPER_AERODIGESTIVE_TRACT          | 0          | 0          | 0           | -0.071      | -0.902   | -0.133     | 1             | 0.166218258     |
| PECAPJ15_UPPER_AERODIGESTIVE_TRACT         | -0.531     | -0.744     | 0.239       | 0.239       | -0.819   | -0.744     | 1             | 0.098837199     |
| YD8_UPPER_AERODIGESTIVE_TRACT              | 0          | 0.509      | 1.045       | 1.045       | -0.633   | 0.478      | 1             | 0.093072471     |
| SNU1066_UPPER_AERODIGESTIVE_TRACT          | -0.82      | 0.123      | 0.135       | 0.112       | -0.82    | -0.797     | 1             | 0.236743808     |
| SNU899_UPPER_AERODIGESTIVE_TRACT           | -0.531     | 0          | 0           | -0.018      | -0.531   | -0.036     | 1             | 0.278886299     |
| SNU1214_UPPER_AERODIGESTIVE_TRACT          | -0.979     | -0.964     | 0           | -0.007      | -0.979   | -0.967     | 1             | 0.11958324      |
| YD10B_UPPER_AERODIGESTIVE_TRACT            | -0.676     | -0.218     | 0.152       | 0.152       | -0.676   | 0.898      | 1             | 0.186047685     |
| PECAPJ41CLONED2_UPPER_AERODIGESTIVE_TRACT  | -0.956     | -0.978     | 0           | -0.002      | -0.963   | -0.978     | 1             | 0.280160386     |
| PECAPJ49_UPPER_AERODIGESTIVE_TRACT         | -0.954     | 0          | 0           | 0.003       | -0.98    | 0.004      | 1             | 0.33584896      |
| A253_SALIVARY_GLAND                        | -0.626     | -0.541     | 0           | 0.487       | -0.462   | -0.541     | 1             | 0.004138976     |
| YD38_UPPER_AERODIGESTIVE_TRACT             | -0.639     | 0          | 0.214       | 0.214       | -0.639   | -0.003     | 1             | 0.310609016     |
| BICR56_UPPER_AERODIGESTIVE_TRACT           | -0.978     | 0          | 0           | 0.011       | -0.978   | -0.001     | 1             | 0.263762592     |
| HSC3_UPPER_AERODIGESTIVE_TRACT             | -0.582     | 0.448      | 0.149       | 0.392       | -0.582   | 0.448      | 1             | 0.336701744     |
| CAL27_UPPER_AERODIGESTIVE_TRACT            | -0.953     | 0          | 0           | -0.035      | -0.964   | 0.07       | 1             | 0.31333995      |
| YD15_SALIVARY_GLAND                        | -0.615     | -0.637     | 0.502       | 0.658       | -0.65    | -0.675     | 1             | 0.118655673     |
| FADU_UPPER_AERODIGESTIVE_TRACT             | 0          | -0.65      | 0           | 0.045       | -0.64    | -0.65      | 1             | 0.04112478      |
| BICR18_UPPER_AERODIGESTIVE_TRACT           | -0.573     | -0.543     | 0           | 0.087       | -0.573   | -0.575     | 1             | -0.039028669    |

Table S9

GSEA Analysis on HNSC cancer cell lines comparing cell lines with or without 9p21.3 loss (arm or focal), Pathways Enriched

| NAME                                                                              | SIZE | ES       | NES      | NOM p-Value | FDR q-Value | FWER p-Value | RANK AT MAX | LEADING EDGE                        |
|-----------------------------------------------------------------------------------|------|----------|----------|-------------|-------------|--------------|-------------|-------------------------------------|
| BIOCARTA_EDG1_PATHWAY                                                             | 26   | 0.770171 | 1.732077 | 0.005163511 | 1           | 1            | 0.923       | 3988 tags=50%, list=16%, signal=59% |
| REACTOME_STRIATED_MUSCLE_CONTRACTION                                              | 23   | 0.747589 | 1.675122 | 0.005067567 | 1           | 1            | 0.989       | 2947 tags=17%, list=12%, signal=20% |
| KEGG_TASTE_TRANSDUCTION                                                           | 33   | 0.716086 | 1.662948 | 0.013675214 | 1           | 1            | 0.993       | 516 tags=12%, list=13%, signal=12%  |
| BIOCARTA_BARRESTIN_SRC_PATHWAY                                                    | 15   | 0.778297 | 1.621138 | 0.028725315 | 1           | 1            | 0.999       | 3223 tags=27%, list=23%, signal=31% |
| REACTOME_METAL_ION_SLC_TRANSPORTERS                                               | 21   | 0.722715 | 1.573749 | 0.037487074 | 1           | 1            | 1           | 769 tags=19%, list=3%, signal=20%   |
| REACTOME_THE_ROLE_OF_NEF_IN_HIV1_REPLICATION_AND_DISEASE_PATHOGENESIS             | 25   | 0.689001 | 1.570837 | 0.027350428 | 1           | 1            | 1           | 17 tags=4%, list=0%, signal=4%      |
| REACTOME_TIGHT_JUNCTION_INTERACTIONS                                              | 28   | 0.686324 | 1.569755 | 0.021885522 | 1           | 1            | 1           | 99 tags=7%, list=0%, signal=7%      |
| KEGG_CELL_ADHESION_MOLECULES_CAMS                                                 | 102  | 0.564584 | 1.564531 | 0.020057306 | 1           | 1            | 1           | 508 tags=9%, list=2%, signal=9%     |
| KEGG_STEROID_HORMONE_BIOSYNTHESIS                                                 | 40   | 0.645129 | 1.56117  | 0.028428094 | 1           | 1            | 1           | 2719 tags=30%, list=11%, signal=34% |
| REACTOME_GAP_JUNCTION_TRAFFICKING                                                 | 23   | 0.722779 | 1.559818 | 0.038206897 | 1           | 1            | 1           | 2479 tags=35%, list=10%, signal=38% |
| REACTOME_CELL_CELL_JUNCTION_ORGANIZATION                                          | 49   | 0.626491 | 1.557937 | 0.02728732  | 1           | 1            | 1           | 247 tags=9%, list=1%, signal=8%     |
| KEGG_PENTOSE_AND_GLYCUCURONATE_INTERCONVERSIONS                                   | 22   | 0.700953 | 1.528772 | 0.051194537 | 1           | 1            | 1           | 5667 tags=50%, list=22%, signal=64% |
| KEGG_ASCORBATE_AND_ALDARATE_METABOLISM                                            | 20   | 0.707971 | 1.51637  | 0.05263158  | 1           | 1            | 1           | 2719 tags=30%, list=11%, signal=34% |
| KEGG_PARKINSONS_DISEASE                                                           | 93   | 0.55174  | 1.489339 | 0.033282906 | 1           | 1            | 1           | 5910 tags=30%, list=23%, signal=39% |
| REACTOME_CELL_JUNCTION_ORGANIZATION                                               | 70   | 0.550621 | 1.462215 | 0.037936267 | 1           | 1            | 1           | 247 tags=6%, list=1%, signal=6%     |
| KEGG_ARACHIDONIC_ACID_METABOLISM                                                  | 45   | 0.593656 | 1.450863 | 0.039808918 | 1           | 1            | 1           | 2830 tags=27%, list=11%, signal=30% |
| REACTOME_REGULATORY_RNA_PATHWAYS                                                  | 21   | 0.670205 | 1.448237 | 0.078397214 | 1           | 1            | 1           | 5076 tags=57%, list=22%, signal=71% |
| REACTOME_ABORTIVE_ELONGATION_OF_HIV1_TRANSCRIPT_IN_THE_ABSENCE_OF_TAT             | 19   | 0.669201 | 1.441679 | 0.08148148  | 1           | 1            | 1           | 3876 tags=42%, list=15%, signal=50% |
| REACTOME_ASSEMBLY_OF_THE_PRE_REPLICATIVE_COMPLEX                                  | 63   | 0.556189 | 1.429341 | 0.046104927 | 1           | 1            | 1           | 7464 tags=49%, list=29%, signal=69% |
| KEGG_DRUG_METABOLISM_OTHER_ENZYMES                                                | 40   | 0.595014 | 1.426465 | 0.07017544  | 1           | 1            | 1           | 2719 tags=28%, list=11%, signal=31% |
| KEGG_TYPE_II_DIABETES_MELLITUS                                                    | 41   | 0.580994 | 1.418746 | 0.068515494 | 1           | 1            | 1           | 1927 tags=17%, list=8%, signal=18%  |
| KEGG_ALDOSTERONE_REGULATED_SODIUM_REABSORPTION                                    | 38   | 0.592241 | 1.418961 | 0.07692308  | 1           | 1            | 1           | 4083 tags=50%, list=24%, signal=54% |
| REACTOME_VOLTAGE_GATED_POTASSIUM_CHANNELS                                         | 34   | 0.596848 | 1.409571 | 0.07826087  | 1           | 1            | 1           | 324 tags=9%, list=1%, signal=9%     |
| BIOCARTA_RHO_PATHWAY                                                              | 32   | 0.604687 | 1.405141 | 0.07272727  | 1           | 1            | 1           | 1084 tags=13%, list=4%, signal=13%  |
| KEGG_FC_GAMMA_R_MEDIATED_PHAGOCYTOSIS                                             | 91   | 0.521835 | 1.403979 | 0.055072464 | 1           | 1            | 1           | 4013 tags=22%, list=16%, signal=26% |
| REACTOME_MICRORNA_MIRNA_BIOGENESIS                                                | 18   | 0.672858 | 1.400063 | 0.10124334  | 1           | 1            | 1           | 5810 tags=61%, list=23%, signal=79% |
| BIOCARTA_BAD_PATHWAY                                                              | 24   | 0.628961 | 1.399039 | 0.087628864 | 1           | 1            | 1           | 4674 tags=38%, list=18%, signal=46% |
| REACTOME_M_G1N_TRANSITION                                                         | 78   | 0.526321 | 1.395061 | 0.07969925  | 1           | 1            | 1           | 6059 tags=35%, list=24%, signal=45% |
| REACTOME_CDT1_ASSOCIATION_WITH_THE_CDC6_ORC_ORIGIN_COMPLEX                        | 54   | 0.554225 | 1.390763 | 0.07042254  | 1           | 1            | 1           | 7464 tags=50%, list=29%, signal=71% |
| REACTOME_RNA_POL_I_PROMOTER_OPENING                                               | 55   | 0.556454 | 1.386885 | 0.07605178  | 1           | 1            | 1           | 6397 tags=38%, list=25%, signal=51% |
| REACTOME_REGULATION_OF_SIGNALING_BY_CBL                                           | 18   | 0.657341 | 1.379645 | 0.11599257  | 1           | 1            | 1           | 2481 tags=22%, list=10%, signal=25% |
| REACTOME_SORSK2_MEDIATED_DEGRADATION_OF_P27_P21                                   | 54   | 0.480333 | 1.370444 | 0.07981565  | 1           | 1            | 1           | 6059 tags=39%, list=24%, signal=51% |
| REACTOME_RECYCLING_PATHWAY_OF_L1                                                  | 26   | 0.611553 | 1.373821 | 0.114817944 | 1           | 1            | 1           | 2286 tags=23%, list=9%, signal=25%  |
| REACTOME_PACKAGING_OF_TELOMERE_ENDS                                               | 42   | 0.555223 | 1.373576 | 0.07820299  | 1           | 1            | 1           | 6397 tags=40%, list=25%, signal=54% |
| REACTOME_FANCONI_ANEMIA_PATHWAY                                                   | 20   | 0.622841 | 1.366789 | 0.104166664 | 1           | 1            | 1           | 4032 tags=30%, list=16%, signal=36% |
| REACTOME_DESTABILIZATION_OF_MRNA_BY_AUF1_HNRNP_D0                                 | 50   | 0.551495 | 1.365638 | 0.08796296  | 1           | 1            | 1           | 7428 tags=50%, list=29%, signal=70% |
| REACTOME_OXYGEN_DEPENDENT_PROLINE_HYDROXYLATION_OF_HYPOXIA_INDUCIBLE_FACTOR_ALPHA | 15   | 0.658078 | 1.361504 | 0.11900533  | 1           | 1            | 1           | 2363 tags=27%, list=9%, signal=29%  |
| REACTOME_NCAM1_INTERACTIONS                                                       | 36   | 0.576865 | 1.35965  | 0.10305958  | 1           | 1            | 1           | 1496 tags=17%, list=6%, signal=18%  |
| KEGG_STARCH_AND_SUCROSE_METABOLISM                                                | 37   | 0.563694 | 1.354787 | 0.097087376 | 1           | 1            | 1           | 2719 tags=19%, list=11%, signal=21% |
| REACTOME_PHASE_I_CONJUGATION                                                      | 56   | 0.534087 | 1.35351  | 0.0913242   | 1           | 1            | 1           | 2719 tags=20%, list=11%, signal=22% |
| REACTOME_ORC1_REMOVAL_FROM_CHROMATIN                                              | 65   | 0.526172 | 1.353487 | 0.08926597  | 1           | 1            | 1           | 7464 tags=48%, list=29%, signal=67% |
| REACTOME_DEPOSITION_OF_NEW_CENPA_CONTAINING_NUCLEOSOMES_AT_THE_CENTROMERE         | 56   | 0.532127 | 1.351076 | 0.10108865  | 1           | 1            | 1           | 8555 tags=50%, list=24%, signal=58% |
| REACTOME_NITRIC_OXIDE_STIMULATES_GUANYLATE_CYCLASE                                | 22   | 0.608178 | 1.335548 | 0.14089656  | 1           | 1            | 1           | 2871 tags=45%, list=11%, signal=51% |
| BIOCARTA_VEGF_PATHWAY                                                             | 29   | 0.579152 | 1.335398 | 0.13866232  | 1           | 1            | 1           | 1927 tags=21%, list=8%, signal=22%  |
| BIOCARTA_GSK3_PATHWAY                                                             | 25   | 0.603801 | 1.333843 | 0.122689076 | 1           | 1            | 1           | 2309 tags=16%, list=9%, signal=18%  |
| REACTOME_CDK_MEDIATED_PHOSPHORYLATION_AND_REMOVAL_OF_CDC6                         | 46   | 0.543932 | 1.331843 | 0.111821085 | 1           | 1            | 1           | 7925 tags=54%, list=31%, signal=79% |
| REACTOME_CYCLIN_E_ASSOCIATED_EVENTS_DURING_G1_S_TRANSITION                        | 63   | 0.51879  | 1.331077 | 0.09968847  | 1           | 1            | 1           | 6059 tags=37%, list=24%, signal=48% |
| BIOCARTA_GCR_PATHWAY                                                              | 19   | 0.624814 | 1.32915  | 0.1465798   | 1           | 1            | 1           | 1927 tags=21%, list=8%, signal=23%  |
| REACTOME_G1_S_TRANSITION                                                          | 108  | 0.471804 | 1.32304  | 0.08840227  | 1           | 1            | 1           | 7925 tags=44%, list=31%, signal=63% |
| REACTOME_APOPTIC_EXECUTION_PHASE                                                  | 51   | 0.520198 | 1.320914 | 0.09693053  | 1           | 1            | 1           | 3278 tags=18%, list=13%, signal=20% |
| REACTOME_INFLAMMASOMES                                                            | 16   | 0.628617 | 1.320492 | 0.16187051  | 1           | 1            | 1           | 2021 tags=19%, list=8%, signal=20%  |
| CANCER-TESTIS-ANTIGEN                                                             | 54   | 0.480333 | 1.320344 | 0.091871346 | 1           | 1            | 1           | 2265 tags=18%, list=9%, signal=20%  |
| REACTOME_STEROID_HORMONES                                                         | 20   | 0.609023 | 1.316482 | 0.15412845  | 1           | 1            | 1           | 1767 tags=10%, list=7%, signal=11%  |
| REACTOME_VIF_MEDIATED_DEGRADATION_OF_APOBEC3G                                     | 47   | 0.534553 | 1.315992 | 0.12480499  | 1           | 1            | 1           | 6059 tags=36%, list=24%, signal=47% |
| KEGG_SMALL_CELL_LUNG_CANCER                                                       | 84   | 0.491926 | 1.315584 | 0.10644678  | 1           | 1            | 1           | 3948 tags=26%, list=15%, signal=31% |
| REACTOME_PLATELET_HOMEOSTASIS                                                     | 71   | 0.505701 | 1.315359 | 0.1036036   | 1           | 1            | 1           | 3010 tags=24%, list=12%, signal=27% |
| REACTOME_P53_INDEPENDENT_G1_S_DNA_DAMAGE_CHECKPOINT                               | 48   | 0.532281 | 1.314497 | 0.11568938  | 0.9915861   | 1            | 1           | 7428 tags=46%, list=29%, signal=65% |
| REACTOME_MEIOTIC_RECOMBINATION                                                    | 75   | 0.494345 | 1.309656 | 0.11179173  | 0.9995672   | 1            | 1           | 6099 tags=35%, list=24%, signal=45% |
| KEGG_PORPHYRIN_AND_CHLOROPHYLL_METABOLISM                                         | 34   | 0.553904 | 1.306764 | 0.14214046  | 0.9971052   | 1            | 1           | 2719 tags=21%, list=11%, signal=23% |
| REACTOME_NEUTRIN_INTERACTIONS                                                     | 19   | 0.610365 | 1.303367 | 0.14160839  | 0.99678326  | 1            | 1           | 2927 tags=21%, list=11%, signal=24% |
| BIOCARTA_HCMV_PATHWAY                                                             | 17   | 0.634228 | 1.299367 | 0.1598023   | 1           | 1            | 1           | 3223 tags=29%, list=13%, signal=34% |
| REACTOME_CITRIC_ACID_CYCLE_TCA_CYCLE                                              | 20   | 0.603066 | 1.295536 | 0.17750439  | 1           | 1            | 1           | 5080 tags=45%, list=20%, signal=56% |
| REACTOME_IL_3_5_AND_GM-CSF_SIGNALING                                              | 39   | 0.545913 | 1.285037 | 0.135878    | 0.98893344  | 1            | 1           | 2481 tags=18%, list=10%, signal=20% |
| REACTOME_LYSOSOME_VESICLE_BIOGENESIS                                              | 23   | 0.583281 | 1.285098 | 0.15939598  | 0.9745598   | 1            | 1           | 4103 tags=22%, list=16%, signal=26% |
| BIOCARTA_AKT_PATHWAY                                                              | 20   | 0.595165 | 1.283943 | 0.17875211  | 0.96540487  | 1            | 1           | 1927 tags=15%, list=8%, signal=16%  |
| BIOCARTA_MCM_PATHWAY                                                              | 18   | 0.599264 | 1.287011 | 0.17572464  | 0.9850114   | 1            | 1           | 7581 tags=61%, list=30%, signal=87% |
| REACTOME_SIGNALING_BY_ERBB2                                                       | 95   | 0.478423 | 1.285279 | 0.10237389  | 0.9792291   | 1            | 1           | 726 tags=5%, list=3%, signal=5%     |
| KEGG_B_CELL_RECEPTOR_SIGNALING_PATHWAY                                            | 73   | 0.482904 | 1.28432  | 0.12708019  | 0.96953064  | 1            | 1           | 2517 tags=12%, list=10%, signal=14% |
| REACTOME_MITOTIC_M_M_G1_PHASES                                                    | 160  | 0.441203 | 1.281349 | 0.0945758   | 0.9704232   | 1            | 1           | 7832 tags=41%, list=31%, signal=59% |
| REACTOME_ADHERENS_JUNCTIONS_INTERACTIONS                                          | 21   | 0.590084 | 1.278812 | 0.17190082  | 0.968655    | 1            | 1           | 1534 tags=14%, list=6%, signal=15%  |
| BIOCARTA_BCELLSURVIVAL_PATHWAY                                                    | 16   | 0.608918 | 1.275065 | 0.18053098  | 0.9731757   | 1            | 1           | 1927 tags=25%, list=8%, signal=27%  |
| REACTOME_GMP_PATHWAYS                                                             | 18   | 0.606413 | 1.273005 | 0.1842162   | 0.9688615   | 1            | 1           | 2871 tags=50%, list=18%, signal=56% |
| BIOCARTA_IL2RB_PATHWAY                                                            | 37   | 0.542148 | 1.26937  | 0.16221035  | 0.97210085  | 1            | 1           | 1927 tags=14%, list=8%, signal=15%  |
| BIOCARTA_IL7_PATHWAY                                                              | 17   | 0.610943 | 1.263801 | 0.20344828  | 0.98673224  | 1            | 1           | 3068 tags=20%, list=12%, signal=22% |
| REACTOME_SEMAPHORIN_INTERACTIONS                                                  | 64   | 0.489497 | 1.262914 | 0.14198473  | 0.9766299   | 1            | 1           | 1993 tags=9%, list=8%, signal=10%   |
| REACTOME_S_PHASE                                                                  | 106  | 0.456783 | 1.260745 | 0.12957746  | 0.97360575  | 1            | 1           | 6059 tags=34%, list=24%, signal=44% |
| BIOCARTA_ACH_PATHWAY                                                              | 15   | 0.610333 | 1.258094 | 0.19604316  | 0.9735438   | 1            | 1           | 4191 tags=33%, list=16%, signal=40% |
| BIOCARTA_RAS_PATHWAY                                                              | 23   | 0.566833 | 1.25686  | 0.19765495  | 0.96747756  | 1            | 1           | 3223 tags=17%, list=13%, signal=20% |
| REACTOME_SYNTHESIS_OF_PIP3_AT_THE_PLASMA_MEMBRANE                                 | 29   | 0.548324 | 1.25185  | 0.19410746  | 0.9778379   | 1            | 1           | 819 tags=14%, list=3%, signal=14%   |
| REACTOME_GPIV_MEDIATED_ACTIVATION_CASCADE                                         | 29   | 0.547522 | 1.25035  | 0.19966997  | 0.9721544   | 1            | 1           | 1927 tags=17%, list=8%, signal=19%  |
| REACTOME_ANTIEN_PROCESSING_CROSS_PRESENTATION                                     | 66   | 0.485244 | 1.245534 | 0.14678898  | 0.98283905  | 1            | 1           | 7428 tags=39%, list=29%, signal=55% |
| REACTOME_AUTODEGRADATION_OF_THE_E3_UBIQUITIN_LIGASE_COP1                          | 46   | 0.505773 | 1.242985 | 0.16666667  | 0.9822829   | 1            | 1           | 7428 tags=46%, list=29%, signal=64% |
| REACTOME_P53_DEPENDENT_G1_DNA_DAMAGE_RESPONSE                                     | 52   | 0.496983 | 1.24226  | 0.1827957   | 0.9738304   | 1            | 1           | 6059 tags=35%, list=24%, signal=45% |
| REACTOME_METABOLISM_OF_STEROID_HORMONES_AND_VITAMINS_A_AND_D                      | 22   | 0.567338 | 1.238708 | 0.208991    | 0.9784806   | 1            | 1           | 1767 tags=9%, list=7%, signal=10%   |
| REACTOME_POTASSIUM_CHANNELS                                                       | 81   | 0.483439 | 1.234446 | 0.16228747  | 0.98690908  | 1            | 1           | 3010 tags=20%, list=12%, signal=22% |
| KEGG_PROTEASOMES                                                                  | 40   | 0.515849 | 1.233867 | 0.19936204  | 0.97698897  | 1            | 1           | 8930 tags=63%, list=35%, signal=96% |
| REACTOME_G_BETA_PROTEIN_BETA_GAMMA_SIGNALING                                      | 26   | 0.554316 | 1.233243 | 0.19400352  | 0.96881586  | 1            | 1           | 4894 tags=38%, list=19%, signal=48% |
| REACTOME_SYNTHESIS_OF_DNA                                                         | 90   | 0.455107 | 1.232121 | 0.15889212  | 0.9633374   | 1            | 1           | 726 tags=46%, list=30%, signal=65%  |
| BIOCARTA_ARF_PATHWAY                                                              | 17   | 0.592508 | 1.230947 | 0.22459893  | 0.9579939   | 1            | 1           | 2516 tags=24%, list=10%, signal=26% |
| REACTOME_FACTORS_INVOLVED_IN_MEGAKARYOCYTE_DEVELOPMENT_AND_PLATELET_PRODUCTION    | 111  | 0.441511 | 1.23074  | 0.13439307  | 0.94826597  | 1            | 1           | 1697 tags=10%, list=7%, signal=11%  |
| REACTOME_MRNA_SPLICING                                                            | 104  | 0.440185 | 1.229712 | 0.13960114  | 0.9422683   | 1            | 1           | 4609 tags=24%, list=18%, signal=29% |
| REACTOME_G_BETA_GAMMA_SIGNALING_THROUGH_PI3K_GAMMA                                | 23   | 0.549386 | 1.224801 | 0.20950705  | 0.9532556   | 1            | 1           | 4894 tags=35%, list=19%, signal=43% |
| REACTOME_AMP_PATHWAYS                                                             | 67   | 0.471208 | 1.221272 | 0.18045112  | 0.9564032   | 1            | 1           | 6460 tags=36%, list=25%, signal=48% |
| KEGG_ECM_RECEPTOR_INTERACTION                                                     | 60   | 0.461412 | 1.220852 | 0.17557251  | 0.9504806   | 1            | 1           | 4121 tags=26%, list=16%, signal=31% |
| REACTOME_PYRUVATE_METABOLISM                                                      | 18   | 0.573971 | 1.218216 | 0.24551971  | 0.95051475  | 1            | 1           | 214 tags=17%, list=1%, signal=17%   |
| REACTOME_CELL_CELL_COMMUNICATION                                                  | 109  | 0.439852 | 1.216262 | 0.16550764  | 0.94906795  | 1            | 1           | 2482 tags=10%, list=10%, signal=11% |
| BIOCARTA_CXCR4_PATHWAY                                                            | 24   | 0.533307 | 1.214863 | 0.24377224  | 0.94516504  | 1            | 1           | 3948 tags=29%, list=15%, signal=34% |
| BIOCARTA_HDAC_PATHWAY                                                             | 26   | 0.545908 | 1.214384 | 0.21631205  | 0.93753886  | 1            | 1           | 3171 tags=27%, list=12%, signal=31% |
| REACTOME_MEIOSIS                                                                  | 102  | 0.4471   | 1.210212 | 0.17914832  | 0.94591445  | 1            | 1           | 6397 tags=35%, list=25%, signal=47% |
| REACTOME_CROSS_PRESENTATION_OF_SOLUBLE_EXOGENOUS_ANTIGENS_ENDOSOMES               | 45   | 0.501203 | 1.209037 | 0.21753247  | 0.9411948   | 1            | 1           | 8930 tags=58%, list=35%, signal=89% |
| KEGG_RETINOL_METABOLISM                                                           | 47   | 0.488926 | 1.20459  | 0.20414673  | 0.951021    | 1            | 1           | 6361 tags=43%, list=25%, signal=57% |
| REACTOME_FORMATION_OF_THE_HIV1_EARLY_ELONGATION_COMPLEX                           | 29   | 0.527094 | 1.202129 | 0.2359736   | 0.9519279   | 1            | 1           | 3876 tags=28%, list=15%, signal=32% |
| REACTOME_DNA_REPLICATION                                                          | 180  | 0.415707 | 1.200826 | 0.14171124  | 0.9478919   | 1            | 1           | 7832 tags=41%, list=31%, signal=59% |
| REACTOME_MITOTIC_G1_G1_S_PHASES                                                   | 133  | 0.423975 | 1.198573 | 0.17574932  | 0.9486619   | 1            | 1           | 6059 tags=32%, list=24%, signal=41% |
| BIOCARTA_LOCAL_PAIN_PATHWAY                                                       | 18   | 0.571252 | 1.197948 | 0.260177    | 0.9428095   | 1            | 1           | 3948 tags=22%, list=15%, signal=26% |
| REACTOME_PI_METABOLISM                                                            | 45   | 0.48635  | 1.194814 | 0.2194745   | 0.9468292   | 1            | 1           | 819 tags=9%, list=3%, signal=9%     |
| REACTOME_APOPTOTIC_CLEAVAGE_OF_CELLULAR                                           |      |          |          |             |             |              |             |                                     |

|                                                                                  |     |          |          |            |            |   |                                     |
|----------------------------------------------------------------------------------|-----|----------|----------|------------|------------|---|-------------------------------------|
| REACTOME_ER_PHAGOSOME_PATHWAY                                                    | 53  | 0.479617 | 1.183286 | 0.21677215 | 0.93497497 | 1 | 7428 tags=42%, list=29%, signal=58% |
| REACTOME_O_LINKED_GLYCOSYLATION_OF_MUCINS                                        | 47  | 0.479964 | 1.178353 | 0.23557693 | 0.94732136 | 1 | 1296 tags=17%, list=5%, signal=18%  |
| REACTOME_PLATELET_CALCIIUM_HOMEOSTASIS                                           | 15  | 0.567257 | 1.176389 | 0.2621528  | 0.94686437 | 1 | 826 tags=20%, list=3%, signal=21%   |
| REACTOME_HIV_INFECTION                                                           | 183 | 0.398153 | 1.175642 | 0.16425756 | 0.94178862 | 1 | 6059 tags=27%, list=24%, signal=35% |
| REACTOME_COMPLEMENT_CASCADE                                                      | 19  | 0.533815 | 1.175389 | 0.25215888 | 0.93473417 | 1 | 3193 tags=16%, list=13%, signal=18% |
| REACTOME_NEURONAL_SYSTEM                                                         | 237 | 0.388085 | 1.172839 | 0.16216215 | 0.93711651 | 1 | 3010 tags=20%, list=12%, signal=14% |
| REACTOME_HOST_INTERACTIONS_OF_HIV_FACTORS                                        | 116 | 0.420565 | 1.172216 | 0.20735294 | 0.931804   | 1 | 6059 tags=20%, list=24%, signal=36% |
| BIOCARTA_MEF2D_PATHWAY                                                           | 18  | 0.556291 | 1.171223 | 0.28347826 | 0.92817926 | 1 | 3657 tags=17%, list=14%, signal=19% |
| REACTOME_INCRETIN_SYNTHESIS_SECRETION_AND_INACTIVATION                           | 17  | 0.561425 | 1.17102  | 0.29491526 | 0.9245167  | 1 | 1065 tags=18%, list=4%, signal=18%  |
| REACTOME_REGULATION_OF_ORNITHINE_DECARBOXYLASE_ODC                               | 47  | 0.47508  | 1.169553 | 0.24052718 | 0.9195563  | 1 | 8524 tags=53%, list=33%, signal=80% |
| REACTOME_G0_AND_EARLY_G1                                                         | 24  | 0.529691 | 1.168521 | 0.26206896 | 0.9161775  | 1 | 1794 tags=13%, list=7%, signal=13%  |
| REACTOME_MRNA_CAPPING                                                            | 29  | 0.506602 | 1.167014 | 0.2487725  | 0.9145512  | 1 | 3876 tags=24%, list=15%, signal=28% |
| REACTOME_MUSCLE_CONTRACTION                                                      | 42  | 0.476894 | 1.165613 | 0.2540453  | 0.9128417  | 1 | 272 tags=5%, list=1%, signal=5%     |
| REACTOME_AUTODEGRADATION_OF_CDH1_BY_CDH1_APC_C                                   | 57  | 0.459249 | 1.163865 | 0.2643857  | 0.912247   | 1 | 8524 tags=49%, list=33%, signal=74% |
| KEGG_METABOLISM_OF_XENOBIOTICS_BY_CYTOCHROME_P450                                | 53  | 0.463973 | 1.157116 | 0.240625   | 0.9311158  | 1 | 2719 tags=23%, list=11%, signal=25% |
| BIOCARTA_PTEN_PATHWAY                                                            | 17  | 0.543969 | 1.156405 | 0.2967628  | 0.92647946 | 1 | 4756 tags=41%, list=19%, signal=51% |
| REACTOME_APC_C_CDCC20_MEDIATED_DEGRADATION_OF_MITOTIC_PROTEINS                   | 65  | 0.45395  | 1.153899 | 0.2435464  | 0.92903095 | 1 | 8524 tags=49%, list=33%, signal=74% |
| BIOCARTA_GLEEVEC_PATHWAY                                                         | 23  | 0.526525 | 1.151111 | 0.28500825 | 0.93255705 | 1 | 4756 tags=32%, list=19%, signal=32% |
| REACTOME_CELL_SURFACE_INTERACTIONS_AT_THE_VASCULAR_WALL                          | 77  | 0.438799 | 1.143079 | 0.24707602 | 0.95709497 | 1 | 3193 tags=21%, list=13%, signal=24% |
| REACTOME_RNA_POL_II_TRANSCRIPTION_PRE_INITIATION_AND_PROMOTER_OPENING            | 40  | 0.469304 | 1.142999 | 0.285956   | 0.9502089  | 1 | 3876 tags=20%, list=15%, signal=24% |
| REACTOME_ELONGATION_ARREST_AND_RECOVERY                                          | 24  | 0.516869 | 1.140171 | 0.30633804 | 0.9542445  | 1 | 4298 tags=38%, list=17%, signal=45% |
| BIOCARTA_CDC42RAC_PATHWAY                                                        | 16  | 0.542043 | 1.140007 | 0.28849557 | 0.9474684  | 1 | 1927 tags=19%, list=8%, signal=20%  |
| KEGG_ANTIGEN_PROCESSING_AND_PRESENTATION                                         | 41  | 0.474302 | 1.139683 | 0.267101   | 0.94232595 | 1 | 1847 tags=12%, list=7%, signal=13%  |
| REACTOME_MRNA_SPLICING_MINOR_PATHWAY                                             | 40  | 0.47257  | 1.138542 | 0.28805238 | 0.93947893 | 1 | 4517 tags=28%, list=18%, signal=33% |
| REACTOME_MEIOTIC_SYNAPSIS                                                        | 64  | 0.445869 | 1.137998 | 0.24423963 | 0.93476504 | 1 | 6397 tags=38%, list=25%, signal=50% |
| REACTOME_HEMOSTASIS                                                              | 408 | 0.359955 | 1.137715 | 0.15441176 | 0.9311093  | 1 | 3223 tags=15%, list=13%, signal=17% |
| BIOCARTA_PPARG_PATHWAY                                                           | 55  | 0.445039 | 1.136978 | 0.28526148 | 0.92507076 | 1 | 2410 tags=19%, list=9%, signal=19%  |
| REACTOME_E2F_MEDIATED_REGULATION_OF_DNA_REPLICATION                              | 34  | 0.47618  | 1.13461  | 0.2821369  | 0.92696977 | 1 | 8198 tags=44%, list=32%, signal=65% |
| REACTOME_TIE2_SIGNALING                                                          | 17  | 0.538143 | 1.134483 | 0.29965752 | 0.9211186  | 1 | 4756 tags=41%, list=19%, signal=51% |
| KEGG_INTESTINAL_IMMUNE_NETWORK_FOR_IGA_PRODUCTION                                | 32  | 0.522251 | 1.133356 | 0.30981067 | 0.91860086 | 1 | 3317 tags=17%, list=13%, signal=20% |
| BIOCARTA_GH_PATHWAY                                                              | 26  | 0.509876 | 1.131194 | 0.30819672 | 0.91998446 | 1 | 4756 tags=35%, list=19%, signal=43% |
| REACTOME_CD28_DEPENDENT_PI3K_AKT_SIGNALING                                       | 20  | 0.513814 | 1.12831  | 0.31088084 | 0.9238655  | 1 | 4488 tags=40%, list=18%, signal=48% |
| REACTOME_IRON_UPTAKE_AND_TRANSPORT                                               | 35  | 0.484411 | 1.127345 | 0.29307568 | 0.92074007 | 1 | 6543 tags=34%, list=26%, signal=46% |
| REACTOME_NEGATIVE_REGULATION_OF_FGFR_SIGNALING                                   | 31  | 0.477726 | 1.121135 | 0.30882353 | 0.93722785 | 1 | 1943 tags=16%, list=8%, signal=17%  |
| REACTOME_ACYL_CHAIN_REMODELLING_OF_PE                                            | 17  | 0.530067 | 1.117459 | 0.32841328 | 0.9444429  | 1 | 3133 tags=29%, list=12%, signal=34% |
| BIOCARTA_SPPA_PATHWAY                                                            | 21  | 0.513941 | 1.113905 | 0.3249054  | 0.9511328  | 1 | 3948 tags=24%, list=15%, signal=28% |
| REACTOME_BASIGIN_INTERACTIONS                                                    | 24  | 0.50102  | 1.11295  | 0.3272553  | 0.9400991  | 1 | 2842 tags=21%, list=10%, signal=23% |
| REACTOME_REGULATION_OF_APOPTOSIS                                                 | 66  | 0.44852  | 1.111617 | 0.31104198 | 0.946298   | 1 | 7428 tags=40%, list=29%, signal=62% |
| BIOCARTA_CTCF_PATHWAY                                                            | 23  | 0.50002  | 1.107803 | 0.316609   | 0.9540625  | 1 | 1927 tags=13%, list=8%, signal=14%  |
| REACTOME_PYRIMIDINE_METABOLISM                                                   | 19  | 0.51103  | 1.10762  | 0.33854166 | 0.948499   | 1 | 2530 tags=21%, list=10%, signal=23% |
| BIOCARTA_ALK_PATHWAY                                                             | 34  | 0.465284 | 1.107515 | 0.31764707 | 0.94270605 | 1 | 3367 tags=18%, list=13%, signal=20% |
| REACTOME_TCA_CYCLE_AND_RESPIRATORY_ELECTRON_TRANSPORT                            | 104 | 0.397397 | 1.100761 | 0.29555237 | 0.9611441  | 1 | 6187 tags=39%, list=26%, signal=53% |
| BIOCARTA_MTA3_PATHWAY                                                            | 18  | 0.516858 | 1.100322 | 0.33862433 | 0.9565695  | 1 | 5750 tags=50%, list=23%, signal=64% |
| REACTOME_CA_DEPENDENT_EVENTS                                                     | 26  | 0.488411 | 1.096338 | 0.3416252  | 0.96457756 | 1 | 4010 tags=15%, list=16%, signal=18% |
| REACTOME_RESPIRATORY_ELECTRON_TRANSPORT_ATP_SYNTHESIS_BY_CHEMIOSMOTIC_COUPLING_A | 67  | 0.422136 | 1.092489 | 0.31455398 | 0.9719719  | 1 | 7617 tags=49%, list=30%, signal=70% |
| ND_HEAT_PRODUCTION_BY_UNCOUPLING_PROTEINS                                        | 2   | 0.494251 | 1.089206 | 0.35294212 | 0.97816294 | 1 | 1337 tags=13%, list=5%, signal=14%  |
| KEGG_PROTEIN_EXPORT                                                              | 65  | 0.417693 | 1.08915  | 0.32758713 | 0.9721706  | 1 | 7617 tags=49%, list=30%, signal=70% |
| REACTOME_RESPIRATORY_ELECTRON_TRANSPORT                                          | 75  | 0.409058 | 1.089129 | 0.3023952  | 0.98613574 | 1 | 2564 tags=13%, list=10%, signal=15% |
| REACTOME_PHOSPHATIDYLINOSITOL_SIGNALING_SYSTEM                                   | 34  | 0.460313 | 1.088953 | 0.33663365 | 0.96076256 | 1 | 3223 tags=24%, list=13%, signal=27% |
| REACTOME_SIGNAL_TRANSDUCTION_BY_L1                                               | 22  | 0.485985 | 1.086738 | 0.35643566 | 0.9625683  | 1 | 2363 tags=18%, list=9%, signal=20%  |
| REACTOME_REGULATION_OF_HYPOXIA_INDUCIBLE_FACTOR_HIF_BY_OXYGEN                    | 53  | 0.425152 | 1.085944 | 0.3146965  | 0.95960766 | 1 | 2719 tags=21%, list=11%, signal=23% |
| KEGG_DRUG_METABOLISM_CYTOCHROME_P450                                             | 44  | 0.444373 | 1.08424  | 0.3418124  | 0.959853   | 1 | 136 tags=7%, list=1%, signal=7%     |
| REACTOME_PHOSPHOLIPASE_C_MEDIATED_CASCADE                                        | 24  | 0.483548 | 1.083424 | 0.35049835 | 0.9570774  | 1 | 1296 tags=17%, list=5%, signal=18%  |
| REACTOME_KERATAN_SULFATE_BIOSYNTHESIS                                            | 35  | 0.454853 | 1.083222 | 0.32495812 | 0.95202965 | 1 | 3837 tags=17%, list=15%, signal=20% |
| BIOCARTA_TOLL_PATHWAY                                                            | 229 | 0.363818 | 1.082009 | 0.2859025  | 0.9508083  | 1 | 2286 tags=10%, list=9%, signal=11%  |
| REACTOME_AXON_GUIDANCE                                                           | 155 | 0.374026 | 1.081834 | 0.30769232 | 0.94576424 | 1 | 2602 tags=15%, list=10%, signal=17% |
| KEGG_CALCIIUM_SIGNALING_PATHWAY                                                  | 21  | 0.440625 | 1.077388 | 0.33774835 | 0.9557531  | 1 | 798 tags=10%, list=3%, signal=10%   |
| REACTOME_PYRUVATE_METABOLISM_AND_CITRIC_ACID_TCA_CYCLE                           | 64  | 0.416151 | 1.075217 | 0.35407406 | 0.9576428  | 1 | 798 tags=10%, list=3%, signal=10%   |
| REACTOME_CLASS_B_2_SECRETIN_FAMILY_RECEPTORS                                     | 79  | 0.405248 | 1.074662 | 0.35103244 | 0.9543587  | 1 | 6099 tags=30%, list=24%, signal=40% |
| REACTOME_RNA_POL_I_TRANSCRIPTION                                                 | 21  | 0.497225 | 1.074358 | 0.37122557 | 0.9497413  | 1 | 4756 tags=33%, list=19%, signal=41% |
| BIOCARTA_INSULIN_PATHWAY                                                         | 22  | 0.487966 | 1.072629 | 0.383821   | 0.95029545 | 1 | 3948 tags=23%, list=15%, signal=21% |
| REACTOME_CCR3_PATHWAY                                                            | 28  | 0.47399  | 1.072008 | 0.37221268 | 0.94695824 | 1 | 9190 tags=61%, list=36%, signal=95% |
| BIOCARTA_PROTEASOME_PATHWAY                                                      | 81  | 0.397911 | 1.071451 | 0.33576643 | 0.9433855  | 1 | 7731 tags=37%, list=30%, signal=53% |
| REACTOME_REGULATION_OF_MRNA_STABILITY_BY_PROTEINS_THAT_BIND_AU_RICH_ELEMENTS     | 29  | 0.463083 | 1.070106 | 0.36963695 | 0.94279945 | 1 | 5080 tags=31%, list=20%, signal=39% |
| KEGG_CITRATE_CYCLE_TCA_CYCLE                                                     | 28  | 0.474424 | 1.06765  | 0.37024793 | 0.94543433 | 1 | 1296 tags=14%, list=5%, signal=15%  |
| REACTOME_KERATAN_SULFATE_KERATIN_METABOLISM                                      | 49  | 0.436154 | 1.065596 | 0.34923077 | 0.946852   | 1 | 3840 tags=22%, list=15%, signal=26% |
| KEGG_OLFACTORY_TRANSDUCTION                                                      | 70  | 0.408192 | 1.064866 | 0.35603714 | 0.9445531  | 1 | 3704 tags=21%, list=15%, signal=25% |
| REACTOME_TRANSPORT_OF_GLUCOSE_AND_OTHER_SUGARS_BILE_SALTS_AND_ORGANIC_ACIDS_MET  | 108 | 0.340311 | 1.062898 | 0.34705882 | 0.9345967  | 1 | 2830 tags=13%, list=10%, signal=16% |
| AL_IONS_AND_AMINE_COMPOUNDS                                                      | 30  | 0.464579 | 1.06164  | 0.38758388 | 0.9441915  | 1 | 5860 tags=30%, list=23%, signal=39% |
| REACTOME_BIOLOGICAL_OXIDATIONS                                                   | 22  | 0.4875   | 1.061318 | 0.39826086 | 0.94015795 | 1 | 3223 tags=27%, list=13%, signal=31% |
| REACTOME_ACTIVATION_OF_THE_PRR_REPLIATIVE_COMPLEX                                | 162 | 0.363005 | 1.058879 | 0.33065596 | 0.94288766 | 1 | 2038 tags=12%, list=8%, signal=13%  |
| BIOCARTA_HER2_PATHWAY                                                            | 110 | 0.374502 | 1.056504 | 0.36947218 | 0.9454774  | 1 | 7774 tags=38%, list=30%, signal=55% |
| REACTOME_TRANSMISSION_ACROSS_CHEMICAL_SYNAPSES                                   | 29  | 0.460851 | 1.052341 | 0.38039866 | 0.95361567 | 1 | 5810 tags=45%, list=23%, signal=58% |
| REACTOME_CELL_CYCLE_CHECKPOINTS                                                  | 132 | 0.369415 | 1.051145 | 0.34051725 | 0.9525287  | 1 | 7887 tags=39%, list=31%, signal=56% |
| KEGG_RNA_POLYMERASE                                                              | 94  | 0.387534 | 1.046157 | 0.37896255 | 0.96397644 | 1 | 5865 tags=27%, list=23%, signal=34% |
| REACTOME_PROCESSING_OF_CAPPED_INTRON_CONTAINING_PRE_MRNA                         | 15  | 0.50879  | 1.043892 | 0.42105263 | 0.96637994 | 1 | 410 tags=2%, list=2%, signal=7%     |
| REACTOME_RNA_POL_II_TRANSCRIPTION                                                | 27  | 0.463726 | 1.042353 | 0.42708334 | 0.96646893 | 1 | 4032 tags=22%, list=16%, signal=26% |
| REACTOME_TGF_BETA_RECEPTOR_SIGNALING_IN_EMT_EPITHELIAL_TO_MESENCHYMAL_TRANSITION | 87  | 0.379157 | 1.04131  | 0.3636387  | 0.9646104  | 1 | 6397 tags=30%, list=25%, signal=40% |
| REACTOME_ENDOSOMAL_SORTING_COMPLEX_REQUIRED_FOR_TRANSPORT_ESCRT                  | 62  | 0.399687 | 1.038993 | 0.393468   | 0.9673461  | 1 | 7428 tags=40%, list=29%, signal=62% |
| KEGG_SYSTEMIC_IP3_ERYTHEMATOSUS                                                  | 50  | 0.419264 | 1.038868 | 0.39556962 | 0.96267295 | 1 | 708 tags=6%, list=3%, signal=6%     |
| REACTOME_SIGNALING_BY_WNT                                                        | 110 | 0.368148 | 1.038594 | 0.38152012 | 0.95862854 | 1 | 6799 tags=33%, list=27%, signal=44% |
| REACTOME_CHROMOSOME_MAINTENANCE                                                  | 17  | 0.497442 | 1.037893 | 0.4424599  | 0.9560122  | 1 | 4592 tags=41%, list=18%, signal=50% |
| REACTOME_SYNTHESIS_OF_PC                                                         | 17  | 0.49187  | 1.03777  | 0.41696113 | 0.95153594 | 1 | 5216 tags=35%, list=20%, signal=44% |
| REACTOME_POST_CHAPERONIN_TUBULIN_FOLDING_PATHWAY                                 | 24  | 0.476274 | 1.035872 | 0.43674177 | 0.9528378  | 1 | 1879 tags=21%, list=7%, signal=22%  |
| KEGG_GLYCOPHINGOLIPID_BIOSYNTHESIS_LACTO_AND_NEOLACTO_SERIES                     | 49  | 0.422384 | 1.03521  | 0.3984     | 0.9501987  | 1 | 6059 tags=37%, list=24%, signal=48% |
| REACTOME_SCF_BETA_TRCP_MEDIATED_DEGRADATION_OF_EM11                              | 189 | 0.34948  | 1.030321 | 0.40684932 | 0.96073335 | 1 | 6099 tags=30%, list=24%, signal=39% |
| REACTOME_TERMINATION_OF_O_GLYCAN_BIOSYNTHESIS                                    | 20  | 0.483378 | 1.028077 | 0.43463498 | 0.96298033 | 1 | 2030 tags=25%, list=8%, signal=27%  |
| BIOCARTA_NGF_PATHWAY                                                             | 18  | 0.481127 | 1.025717 | 0.45360824 | 0.96555406 | 1 | 4756 tags=33%, list=19%, signal=41% |
| REACTOME_SYNTHESIS_OF_PA                                                         | 21  | 0.470951 | 1.024683 | 0.4214047  | 0.9640597  | 1 | 2145 tags=14%, list=8%, signal=16%  |
| REACTOME_SYNTHESIS_OF_P2                                                         | 33  | 0.435858 | 1.0239   | 0.41373533 | 0.9617074  | 1 | 5390 tags=30%, list=21%, signal=38% |
| KEGG_FRUCTOSE_AND_MANNOSE_METABOLISM                                             | 16  | 0.497575 | 1.02388  | 0.44181818 | 0.9570173  | 1 | 136 tags=13%, list=1%, signal=13%   |
| REACTOME_FGFR_LIGAND_BINDING_AND_ACTIVATION                                      | 193 | 0.347182 | 1.022012 | 0.41888297 | 0.9584095  | 1 | 4571 tags=22%, list=18%, signal=27% |
| KEGG_FOCAL_ADHESION                                                              | 21  | 0.466664 | 1.021347 | 0.43816254 | 0.9560218  | 1 | 8247 tags=52%, list=32%, signal=77% |
| REACTOME_INSULIN_RECEPTOR_RECYCLING                                              | 54  | 0.407431 | 1.018268 | 0.41259843 | 0.96085806 | 1 | 1084 tags=6%, list=4%, signal=6%    |
| REACTOME_PATHOGENIC_ESCHERICHIA_COLI_INFECTION                                   | 70  | 0.382542 | 1.017559 | 0.41768292 | 0.95853245 | 1 | 5120 tags=24%, list=20%, signal=30% |
| REACTOME_OPIOID_SIGNALLING                                                       | 52  | 0.404349 | 1.01641  | 0.43393394 | 0.9575536  | 1 | 5810 tags=27%, list=23%, signal=35% |
| REACTOME_MRNA_POL_II_PRE_TRANSCRIPTION_EVENTS                                    | 22  | 0.458125 | 1.014745 | 0.46192053 | 0.9581807  | 1 | 136 tags=9%, list=1%, signal=9%     |
| REACTOME_SHC_MEDIATED_CASCADE                                                    | 50  | 0.407264 | 1.013426 | 0.43670887 | 0.95767987 | 1 | 6181 tags=30%, list=24%, signal=40% |
| REACTOME_GOLGI_ASSOCIATED_VESICLE_BIOGENESIS                                     | 21  | 0.469802 | 1.012779 | 0.44821733 | 0.9550803  | 1 | 4756 tags=33%, list=19%, signal=41% |
| BIOCARTA_IGF1_PATHWAY                                                            | 24  | 0.469896 | 1.011766 | 0.45502645 | 0.95375943 | 1 | 6412 tags=33%, list=25%, signal=44% |
| REACTOME_TRANSFERRIN_ENDOCYTOSIS_AND_RECYCLING                                   | 385 | 0.323822 | 1.00     |            |            |   |                                     |

|                                                                               |     |          |          |            |            |   |                                     |
|-------------------------------------------------------------------------------|-----|----------|----------|------------|------------|---|-------------------------------------|
| KEGG_REGULATION_OF_ACTIN_CYTOSKELETON                                         | 196 | 0.330343 | 0.997316 | 0.4654498  | 0.9216861  | 1 | 1985 tags=9%, list=8%, signal=9%    |
| KEGG_OXIDATIVE_PHOSPHORYLATION                                                | 93  | 0.364322 | 0.992618 | 0.46439168 | 0.9314307  | 1 | 7617 tags=44%, list=30%, signal=63% |
| KEGG_BIOPHYSICS_PATHWAY                                                       | 24  | 0.454314 | 0.992603 | 0.4645799  | 0.92744845 | 1 | 4401 tags=29%, list=17%, signal=35% |
| KEGG_BIOPHYSICS_PATHWAY                                                       | 26  | 0.453136 | 0.991781 | 0.47058824 | 0.92596346 | 1 | 3918 tags=19%, list=15%, signal=23% |
| KEGG_RAS_ACTIVATION_UOPN_CA2_INFUX_THROUGH_NMDA_RECEPTOR                      | 17  | 0.46121  | 0.980672 | 0.4642857  | 0.9256176  | 1 | 3001 tags=18%, list=12%, signal=20% |
| KEGG_NUCLEAR_RECEPTOR_TRANSCRIPTION_PATHWAY                                   | 44  | 0.40635  | 0.989672 | 0.4752     | 0.9238713  | 1 | 2125 tags=16%, list=12%, signal=17% |
| KEGG_TPO_PATHWAY                                                              | 24  | 0.445407 | 0.987427 | 0.47582606 | 0.9282785  | 1 | 4756 tags=33%, list=19%, signal=41% |
| KEGG_FORMATION_OF_RNA_POL_II_ELONGATION_COMPLEX                               | 36  | 0.415403 | 0.98679  | 0.46042004 | 0.92431706 | 1 | 4298 tags=25%, list=17%, signal=30% |
| KEGG_PI_3K_CASCADE                                                            | 48  | 0.401157 | 0.981814 | 0.4648986  | 0.93463576 | 1 | 1943 tags=13%, list=8%, signal=14%  |
| KEGG_BETA_GAMMA_SIGNALING_THROUGH_PL_C_BETA                                   | 19  | 0.464643 | 0.979319 | 0.48776224 | 0.9378079  | 1 | 4894 tags=37%, list=19%, signal=46% |
| KEGG_REGULATION_OF_MITOTIC_CELL_CYCLE                                         | 77  | 0.369116 | 0.977297 | 0.4673748  | 0.9396402  | 1 | 7428 tags=42%, list=29%, signal=58% |
| KEGG_PAR1_PATHWAY                                                             | 35  | 0.424061 | 0.976889 | 0.5024793  | 0.9369703  | 1 | 2564 tags=14%, list=10%, signal=16% |
| KEGG_CREB_PHOSPHORYLATION_THROUGH_THE_ACTIVATION_OF_RAS                       | 27  | 0.42986  | 0.974219 | 0.4788494  | 0.9408243  | 1 | 3972 tags=19%, list=16%, signal=22% |
| KEGG_PROXIMAL_TUBULE_BICARBONATE_RECLAMATION                                  | 20  | 0.49045  | 0.970033 | 0.516696   | 0.94877034 | 1 | 4887 tags=40%, list=19%, signal=49% |
| KEGG_IMMUNOREGULATORY_INTERACTIONS_BETWEEN_A_LYMPHOID_AND_A_NON_LYMPHOID_CELL | 38  | 0.409589 | 0.969931 | 0.49447078 | 0.9451058  | 1 | 1515 tags=5%, list=6%, signal=6%    |
| KEGG_NEUROACTIVE_LIGAND_RECEPTOR_INTERACTION                                  | 181 | 0.328012 | 0.969148 | 0.49395972 | 0.9435023  | 1 | 2405 tags=13%, list=9%, signal=15%  |
| KEGG_HUNTINGTONS_DISEASE                                                      | 151 | 0.340599 | 0.967813 | 0.52136755 | 0.94318163 | 1 | 5910 tags=29%, list=23%, signal=38% |
| KEGG_ECM_PATHWAY                                                              | 24  | 0.44006  | 0.965659 | 0.49834436 | 0.9452904  | 1 | 4488 tags=25%, list=18%, signal=30% |
| KEGG_ENDOCYTOSIS                                                              | 166 | 0.32825  | 0.96221  | 0.52387846 | 0.95091015 | 1 | 2194 tags=10%, list=9%, signal=10%  |
| KEGG_GLYCOSAMINOGLYCAN_METABOLISM                                             | 102 | 0.352034 | 0.962175 | 0.5138282  | 0.9472084  | 1 | 1296 tags=9%, list=5%, signal=9%    |
| KEGG_TID_PATHWAY                                                              | 18  | 0.454762 | 0.961406 | 0.5103448  | 0.9455111  | 1 | 1146 tags=11%, list=4%, signal=12%  |
| KEGG_KINESINS                                                                 | 23  | 0.435081 | 0.960266 | 0.5        | 0.94502604 | 1 | 1697 tags=13%, list=7%, signal=14%  |
| KEGG_APOPTOSIS                                                                | 141 | 0.337335 | 0.958305 | 0.53781515 | 0.94667584 | 1 | 5068 tags=20%, list=20%, signal=25% |
| KEGG_GENERIC_TRANSCRIPTION_PATHWAY                                            | 323 | 0.310894 | 0.95458  | 0.5613809  | 0.953517   | 1 | 5127 tags=22%, list=20%, signal=28% |
| KEGG_GALACTOSE_METABOLISM                                                     | 22  | 0.444307 | 0.922272 | 0.48861647 | 0.955984   | 1 | 3026 tags=16%, list=12%, signal=21% |
| KEGG_DNA_REPAIR                                                               | 103 | 0.383417 | 0.932014 | 0.57294766 | 0.9589869  | 1 | 6105 tags=26%, list=24%, signal=31% |
| KEGG_MET_PATHWAY                                                              | 37  | 0.402348 | 0.950428 | 0.5190972  | 0.9534686  | 1 | 4943 tags=27%, list=19%, signal=34% |
| KEGG_MRNA_3_END_PROCESSING                                                    | 33  | 0.407936 | 0.94884  | 0.5281457  | 0.954141   | 1 | 6491 tags=30%, list=25%, signal=41% |
| KEGG_GABA_B_RECEPTOR_ACTIVATION                                               | 35  | 0.406812 | 0.94576  | 0.5472637  | 0.95902675 | 1 | 458 tags=9%, list=2%, signal=9%     |
| KEGG_TRANS_GOLGI_NETWORK_VESICLE_BUDDING                                      | 57  | 0.368225 | 0.944629 | 0.53051645 | 0.95847267 | 1 | 6181 tags=30%, list=24%, signal=39% |
| KEGG_ACTIVATION_OF_NF_KAPPAB_IN_B_CELLS                                       | 61  | 0.367968 | 0.943634 | 0.55007946 | 0.95736504 | 1 | 6059 tags=33%, list=24%, signal=43% |
| KEGG_HEPARAN_SULFATE_HEPARIN_HS_GAG_METABOLISM                                | 48  | 0.386106 | 0.943418 | 0.5378549  | 0.9542804  | 1 | 3308 tags=17%, list=13%, signal=19% |
| KEGG_GLUCCOSE_METABOLISM                                                      | 61  | 0.366172 | 0.942956 | 0.5504732  | 0.95180583 | 1 | 5231 tags=26%, list=21%, signal=33% |
| KEGG_LEUKOCYTE_TRANSENDOTHELIAL_MIGRATION                                     | 111 | 0.338788 | 0.941693 | 0.52949643 | 0.9517764  | 1 | 1927 tags=8%, list=8%, signal=9%    |
| KEGG_FORMATION_OF_TUBULIN_FOLDING_INTERMEDIATES_BY_CCT_TRIC                   | 20  | 0.473371 | 0.94157  | 0.5253378  | 0.94488484 | 1 | 5216 tags=40%, list=20%, signal=50% |
| KEGG_SIGNALING_BY_FGFR                                                        | 100 | 0.346699 | 0.935948 | 0.5431366  | 0.96144003 | 1 | 1943 tags=8%, list=6%, signal=9%    |
| KEGG_FRSL_MEDIATED_CASCADE                                                    | 30  | 0.405340 | 0.931791 | 0.5519591  | 0.96775407 | 1 | 1943 tags=8%, list=6%, signal=9%    |
| KEGG_DEVELOPMENTAL_BIOLOGY                                                    | 351 | 0.299815 | 0.931634 | 0.6528436  | 0.9645708  | 1 | 2286 tags=10%, list=9%, signal=10%  |
| KEGG_PROCESSING_OF_CAPPED_INTRONLESS_PRE_MRNA                                 | 23  | 0.411626 | 0.928894 | 0.5457627  | 0.9683162  | 1 | 3814 tags=26%, list=15%, signal=31% |
| KEGG_FORMATION_OF_TRANSCRIPTION_COUPLED_NER_TC_NER_REPAIR_COMPLEX             | 29  | 0.404948 | 0.928306 | 0.56435645 | 0.9662625  | 1 | 3876 tags=24%, list=15%, signal=28% |
| KEGG_TRANSLATION                                                              | 170 | 0.318631 | 0.927793 | 0.5813953  | 0.964087   | 1 | 2012 tags=9%, list=8%, signal=10%   |
| KEGG_NON_SMALL_CELL_LUNG_CANCER                                               | 54  | 0.362061 | 0.927255 | 0.5629984  | 0.9619992  | 1 | 1993 tags=15%, list=8%, signal=16%  |
| KEGG_HEMATOPOIETIC_CELL_LINEAGE                                               | 65  | 0.353527 | 0.926227 | 0.5602504  | 0.9611508  | 1 | 3317 tags=23%, list=13%, signal=26% |
| KEGG_NEUROTRANSMITTER_RECEPTOR_BINDING_AND_DOWNSTREAM_TRANSMISSION_IN_THE_P   | 120 | 0.327145 | 0.92525  | 0.5872781  | 0.9601035  | 1 | 4894 tags=27%, list=19%, signal=33% |
| KEGG_OSTSYNAPTIC_CELL                                                         | 124 | 0.324293 | 0.924517 | 0.5905849  | 0.9585844  | 1 | 4167 tags=19%, list=16%, signal=22% |
| KEGG_INFLUENZA_VIRAL_RNA_TRANSCRIPTION_AND_REPLICATION                        | 103 | 0.383426 | 0.923014 | 0.57294766 | 0.9589869  | 1 | 2913 tags=13%, list=11%, signal=15% |
| KEGG_PL_C_BETA_MEDIATED_EVENTS                                                | 36  | 0.390879 | 0.923345 | 0.54545456 | 0.95721847 | 1 | 3756 tags=22%, list=15%, signal=28% |
| KEGG_FLMP_PATHWAY                                                             | 24  | 0.422422 | 0.921434 | 0.55126053 | 0.9580874  | 1 | 4894 tags=25%, list=19%, signal=31% |
| KEGG_GLUCAAGON_TYPE_LIGAND_RECEPTORS                                          | 53  | 0.365426 | 0.917878 | 0.5771605  | 0.96197516 | 1 | 2999 tags=19%, list=12%, signal=21% |
| KEGG_COLLAGEN_FORMATION                                                       | 204 | 0.308082 | 0.917777 | 0.6464516  | 0.9588161  | 1 | 3130 tags=14%, list=12%, signal=16% |
| KEGG_SL_C_MEDIATED_TRANSMEMBRANE_TRANSPORT                                    | 78  | 0.346136 | 0.917552 | 0.58651024 | 0.9589898  | 1 | 7832 tags=38%, list=31%, signal=55% |
| KEGG_MITOTIC_PROMETAPHASE                                                     | 17  | 0.427161 | 0.914478 | 0.57699114 | 0.9571742  | 1 | 560 tags=12%, list=2%, signal=12%   |
| KEGG_N_GLYCAN_ANTENNAE_ELONGATION_IN_THE_MEDIAL_TRANS_GOLGI                   | 18  | 0.427161 | 0.914478 | 0.57699114 | 0.9571742  | 1 | 3133 tags=22%, list=12%, signal=25% |
| KEGG_SIGNALING_BY_FGFR_IN_DISEASE                                             | 114 | 0.324995 | 0.91253  | 0.62608695 | 0.9589143  | 1 | 4345 tags=17%, list=17%, signal=20% |
| KEGG_ACTIVATION_OF_KAINATE_RECEPTORS_UPON GLUTAMATE_BINDING                   | 29  | 0.39865  | 0.908796 | 0.58132046 | 0.9649857  | 1 | 3010 tags=17%, list=12%, signal=20% |
| KEGG_METABOLISM_OF_CARBOHYDRATES                                              | 215 | 0.300002 | 0.903488 | 0.6744186  | 0.97487676 | 1 | 5758 tags=24%, list=23%, signal=30% |
| KEGG_ECRF_DOWNREGULATION                                                      | 25  | 0.407342 | 0.901781 | 0.5721562  | 0.97594385 | 1 | 4032 tags=26%, list=20%, signal=31% |
| KEGG_CLEAVAGE_OF_GROWING_TRANSCRIPT_IN_THE_TERMINATION_REGION                 | 42  | 0.369531 | 0.898961 | 0.59587955 | 0.97953606 | 1 | 5067 tags=24%, list=20%, signal=30% |
| KEGG_NKCELLS_PATHWAY                                                          | 18  | 0.422056 | 0.898936 | 0.6016667  | 0.9762099  | 1 | 3223 tags=17%, list=13%, signal=19% |
| KEGG_CREB_PATHWAY                                                             | 26  | 0.400396 | 0.897263 | 0.58949095 | 0.97718066 | 1 | 4756 tags=27%, list=19%, signal=33% |
| KEGG_MCALPAIN_PATHWAY                                                         | 23  | 0.405298 | 0.89666  | 0.6044143  | 0.9747981  | 1 | 129 tags=4%, list=1%, signal=4%     |
| KEGG_AMI_PATHWAY                                                              | 17  | 0.427062 | 0.892331 | 0.57829183 | 0.98305625 | 1 | 6876 tags=53%, list=27%, signal=72% |
| KEGG_CREB_PHOSPHORYLATION_THROUGH_THE_ACTIVATION_OF_CAMKII                    | 15  | 0.442303 | 0.891693 | 0.603321   | 0.9812917  | 1 | 3001 tags=20%, list=12%, signal=23% |
| KEGG_MELANOMA                                                                 | 64  | 0.347552 | 0.890275 | 0.6053812  | 0.9814557  | 1 | 1943 tags=13%, list=8%, signal=13%  |
| KEGG_DOWNSTREAM_SIGNALING_OF_ACTIVATED_FGFR                                   | 88  | 0.330166 | 0.889066 | 0.63274336 | 0.9818006  | 1 | 1943 tags=8%, list=8%, signal=9%    |
| KEGG_PATHWAYS_IN_CANCER                                                       | 304 | 0.289375 | 0.888547 | 0.72073174 | 0.97910595 | 1 | 2481 tags=11%, list=10%, signal=12% |
| KEGG_HIV_LIFE_CYCLE                                                           | 107 | 0.315885 | 0.887848 | 0.6589858  | 0.9773575  | 1 | 5397 tags=22%, list=21%, signal=28% |
| KEGG_APC_CDC20_MEDIATED_DEGRADATION_OF_NEK2A                                  | 22  | 0.406319 | 0.885405 | 0.6207483  | 0.9801927  | 1 | 4032 tags=26%, list=20%, signal=31% |
| KEGG_LATE_PHASE_OF_HIV_LIFE_CYCLE                                             | 94  | 0.325089 | 0.885023 | 0.66312593 | 0.9780901  | 1 | 5810 tags=24%, list=23%, signal=32% |
| KEGG_PDGF_PATHWAY                                                             | 32  | 0.374941 | 0.882989 | 0.61833334 | 0.979926   | 1 | 4756 tags=22%, list=19%, signal=27% |
| KEGG_IGF1R_PATHWAY                                                            | 22  | 0.396924 | 0.881202 | 0.6260575  | 0.98102975 | 1 | 4756 tags=27%, list=19%, signal=33% |
| KEGG_NO1_PATHWAY                                                              | 28  | 0.391823 | 0.879905 | 0.6258741  | 0.98099935 | 1 | 4571 tags=21%, list=18%, signal=26% |
| KEGG_PURINE_METABOLISM                                                        | 142 | 0.309216 | 0.879048 | 0.7053942  | 0.9797346  | 1 | 4169 tags=22%, list=16%, signal=26% |
| KEGG_FCER1_PATHWAY                                                            | 36  | 0.371332 | 0.877034 | 0.64786327 | 0.981215   | 1 | 4756 tags=25%, list=19%, signal=31% |
| KEGG_GRB2_SOS_PROVIDES_LINKAGE_TO_MAPK_SIGNALING_FOR_INTERGRINS               | 15  | 0.438555 | 0.876101 | 0.6360544  | 0.9802957  | 1 | 6876 tags=60%, list=27%, signal=82% |
| KEGG_ALPHA_S_SIGNALING_EVENTS                                                 | 82  | 0.329827 | 0.873133 | 0.6519757  | 0.9842461  | 1 | 1769 tags=11%, list=7%, signal=12%  |
| KEGG_MHC_CLASS_II_ANTIGEN_PRESENTATION                                        | 77  | 0.32529  | 0.871913 | 0.675841   | 0.98400563 | 1 | 5346 tags=27%, list=21%, signal=34% |
| KEGG_PROSTACYCLIN_SIGNALING_THROUGH_PROSTACYCLIN_RECEPTOR                     | 15  | 0.41237  | 0.871188 | 0.61565834 | 0.98262325 | 1 | 4894 tags=28%, list=19%, signal=34% |
| KEGG_MRNA_PROCESSING                                                          | 151 | 0.300296 | 0.869791 | 0.7251521  | 0.9825969  | 1 | 7887 tags=35%, list=31%, signal=41% |
| KEGG_P130CAS_LINKAGE_TO_MAPK_SIGNALING_FOR_INTEGRINS                          | 15  | 0.435331 | 0.869013 | 0.63783316 | 0.98127246 | 1 | 3948 tags=35%, list=31%, signal=39% |
| KEGG_PROSTATE_CANCER                                                          | 84  | 0.324747 | 0.868399 | 0.6473827  | 0.97958845 | 1 | 1993 tags=13%, list=8%, signal=14%  |
| KEGG_GPCR_DOWNSTREAM_SIGNALING                                                | 357 | 0.281552 | 0.86709  | 0.796319   | 0.97947335 | 1 | 2405 tags=10%, list=9%, signal=11%  |
| KEGG_POST_NMDA_RECEPTOR_ACTIVATION_EVENTS                                     | 32  | 0.36967  | 0.862071 | 0.6247934  | 0.9881526  | 1 | 3972 tags=19%, list=16%, signal=22% |
| KEGG_RENAL_CELL_CARCINOMA                                                     | 66  | 0.329005 | 0.861862 | 0.67771083 | 0.9854452  | 1 | 3223 tags=14%, list=13%, signal=16% |
| KEGG_HS_GAG_DEGRADATION                                                       | 19  | 0.403421 | 0.858129 | 0.65180105 | 0.9911212  | 1 | 1034 tags=11%, list=4%, signal=11%  |
| KEGG_SIGNALING_BY_NGF                                                         | 206 | 0.288705 | 0.857243 | 0.7720685  | 0.99005795 | 1 | 4260 tags=15%, list=17%, signal=18% |
| KEGG_CASPASE_PATHWAY                                                          | 23  | 0.387227 | 0.855904 | 0.67657346 | 0.9902075  | 1 | 3730 tags=17%, list=15%, signal=20% |
| KEGG_APC_C_CDC20_MEDIATED_DEGRADATION_OF_CYCLIN_B                             | 20  | 0.394777 | 0.855312 | 0.6403509  | 0.9885222  | 1 | 410 tags=5%, list=2%, signal=5%     |
| KEGG_G_PROTEIN_ACTIVATION                                                     | 23  | 0.390369 | 0.85446  | 0.6565567  | 0.9873108  | 1 | 4937 tags=26%, list=19%, signal=32% |
| KEGG_PROGESTERONE_MEDIATED_OOCYTE_MATURATION                                  | 80  | 0.316155 | 0.851483 | 0.6927247  | 0.99134755 | 1 | 3326 tags=30%, list=25%, signal=40% |
| KEGG_INWARDLY_RECTIFYING_K_CHANNELS                                           | 29  | 0.36805  | 0.849027 | 0.6491525  | 0.9939637  | 1 | 1857 tags=14%, list=7%, signal=15%  |
| KEGG_SRP_DEPENDENT_COTRANSLATIONAL_PROTEIN_TARGETING_TO_MEMBRANE              | 131 | 0.293028 | 0.845885 | 0.74110955 | 0.99817467 | 1 | 1959 tags=9%, list=8%, signal=10%   |
| KEGG_FORMATION_OF_FIBRIN_CLOT_CLOTTING_CASCADE                                | 20  | 0.397045 | 0.844449 | 0.6579407  | 0.9983575  | 1 | 3193 tags=25%, list=13%, signal=29% |
| KEGG_SIGNALING_BY_CONSTITUTIVELY_ACTIVE_EGFR                                  | 18  | 0.399531 | 0.843605 | 0.65591395 | 0.99716955 | 1 | 1927 tags=17%, list=8%, signal=18%  |
| KEGG_PENTOSE_PHOSPHATE_PATHWAY                                                | 23  | 0.381611 | 0.842917 | 0.6627517  | 0.99577045 | 1 | 7082 tags=39%, list=28%, signal=54% |
| KEGG_INHIBITION_OF_VOLTAGE_GATED_CA2_CHANNELS_VIA_GBETA_GAMMA_SUBUNITS        | 23  | 0.380348 | 0.842746 | 0.66435987 | 0.99304473 | 1 | 458 tags=9%, list=2%, signal=9%     |
| KEGG_RNA_POL_III_AND_MITOCHONDRIAL_TRANSCRIPTION                              | 111 | 0.307818 | 0.842743 | 0.7573099  | 0.9899986  | 1 | 6099 tags=31%, list=24%, signal=40% |
| KEGG_DAG_AND_IP3_SIGNALING                                                    | 28  | 0.364748 | 0.842039 | 0.6730769  | 0.98853767 | 1 | 125 tags=4%, list=0%, signal=4%     |
| KEGG_ETHER_LIPID_METABOLISM                                                   | 23  | 0.384826 | 0.84185  | 0.6730769  | 0.98859905 | 1 | 3608 tags=22%, list=14%, signal=25% |
| KEGG_ADP_SIGNALING_THROUGH_P2RY12                                             | 19  | 0.392729 | 0.84112  | 0.67911714 | 0.98438364 | 1 | 4894 tags=26%, list=21%, signal=33% |
| KEGG_L1CAM_INTERACTIONS                                                       | 81  | 0.3127   | 0.840488 | 0.73417723 | 0.9830355  | 1 | 3595 tags=16%, list=14%, signal=19% |
| KEGG_NFKB_PATHWAY                                                             | 23  | 0.386471 | 0.840144 | 0.68456376 | 0.9809637  | 1 | 67 tags=4%, list=0%, signal=4%      |
| KEGG_DEADENYLATION_DEPENDENT_MRNA_DECAY                                       | 42  | 0.349118 | 0.839235 | 0.696875   | 0.9799033  | 1 | 4401 tags=17%, list=17%, signal=20% |
| KEGG_PREFOLDIN_MEDIATED_TRANSFER_OF_SUBSTRATE_TO_CCT_TRIC                     | 26  | 0.375507 | 0.839232 | 0.6464471  | 0.9769777  | 1 | 5216 tags=31%, list=20%, signal=39% |
| KEGG_TOR_PATHWAY                                                              | 43  | 0.336042 | 0.837426 | 0.6970684  | 0.9781385  | 1 | 4756 tags=23%, list=19%, signal=29% |
| KEGG_IL_RECEPTOR_SHC_SIGNALING                                                | 23  | 0.382502 | 0.837248 | 0.68576103 | 0.9756342  | 1 | 2431 tags=22%, list=10%, signal=24% |
| KEGG_METABOLISM_OF_MRNA                                                       | 230 | 0.274984 | 0.836629 | 0.848745   | 0.97407556 | 1 | 7295 tags=29%, list=29%, signal=40% |
| KEGG_GLYCEROPHOSPHOLIPID_METABOLISM                                           | 64  | 0.326126 | 0.835972 | 0.71791047 | 0.9726612  | 1 | 4086 tags=20%, list=16%, signal=24% |
| KEGG_LIPOPROTEIN_METABOLISM                                                   | 20  | 0.377266 | 0.83416  | 0.6828859  | 0.97379166 | 1 | 216 tags=4%, list=1%, signal=4%     |
| KEGG_SYNTHESIS_SECRETION_AND_INACTIVATION_OF_GLP1                             | 15  | 0.418548 | 0.834134 | 0.67591475 | 0.9709644  | 1 | 3010 tags=20%, list=12%, signal=23% |
| KEGG_HS_GAG_BIOSYNTHESIS                                                      | 28  | 0.368518 | 0.831279 | 0.68770766 | 0.974      |   |                                     |

|                                                                                                         |     |          |          |            |            |   |                                     |
|---------------------------------------------------------------------------------------------------------|-----|----------|----------|------------|------------|---|-------------------------------------|
| REACTOME_GLYCOLYSIS                                                                                     | 25  | 0.371162 | 0.814231 | 0.7111486  | 0.98997134 | 1 |                                     |
| KEGG_ALANINE_ASPARTATE_AND_GLUTAMATE_METABOLISM                                                         | 30  | 0.346175 | 0.813167 | 0.7419355  | 0.98930585 | 1 | 4678 tags=28%, list=18%, signal=34% |
| KEGG_DILATED_CARDIOMYOPATHY                                                                             | 78  | 0.306368 | 0.806922 | 0.7848485  | 0.99923086 | 1 | 4649 tags=23%, list=18%, signal=28% |
| REACTOME_METABOLISM_OF_PROTEINS                                                                         | 430 | 0.253995 | 0.805984 | 0.93787336 | 0.9982001  | 1 | 3317 tags=15%, list=13%, signal=18% |
| KEGG_HYPERTROPHIC_CARDIOMYOPATHY_HCM                                                                    | 74  | 0.304273 | 0.805763 | 0.7807898  | 0.9953392  | 1 | 2244 tags=8%, list=9%, signal=9%    |
| REACTOME_PHOSPHOLIPID_METABOLISM                                                                        | 176 | 0.275162 | 0.8049   | 0.8630319  | 0.9948158  | 1 | 3317 tags=15%, list=13%, signal=17% |
| REACTOME_INFLUENZA_LIFE_CYCLE                                                                           | 157 | 0.279685 | 0.803935 | 0.86052996 | 0.9938954  | 1 | 3906 tags=10%, list=15%, signal=33% |
| KEGG_FC_EPSILON_RI_SIGNALING_PATHWAY                                                                    | 66  | 0.308368 | 0.803192 | 0.7776097  | 0.992433   | 1 | 4167 tags=16%, list=16%, signal=19% |
| BIOCARTA_RARRXR_PATHWAY                                                                                 | 15  | 0.389477 | 0.802852 | 0.68705034 | 0.9903209  | 1 | 4756 tags=26%, list=19%, signal=32% |
| BIOCARTA_CK1_PATHWAY                                                                                    | 16  | 0.391346 | 0.801747 | 0.7101695  | 0.9896448  | 1 | 2579 tags=13%, list=10%, signal=15% |
| REACTOME_3_UTR_MEDIATED_TRANSLATIONAL_REGULATION                                                        | 129 | 0.279422 | 0.797922 | 0.86609685 | 0.9946702  | 1 | 6447 tags=44%, list=25%, signal=59% |
| REACTOME_TRANSMEMBRANE_TRANSPORT_OF_SMALL_MOLECULES                                                     | 350 | 0.256757 | 0.796416 | 0.9357231  | 0.9946787  | 1 | 4416 tags=16%, list=17%, signal=20% |
| REACTOME_GLUCCONEOGENESIS                                                                               | 30  | 0.346007 | 0.796333 | 0.7629382  | 0.99209505 | 1 | 4894 tags=20%, list=19%, signal=24% |
| REACTOME_ACTIVATED_NOTCH1_TRANSMITS_SIGNAL_TO_THE_NUCLEUS                                               | 26  | 0.349594 | 0.795941 | 0.7385965  | 0.9900732  | 1 | 4629 tags=30%, list=18%, signal=37% |
| REACTOME_ADP_SIGNALLING_THROUGH_P2RY1                                                                   | 24  | 0.380591 | 0.794235 | 0.74176776 | 0.9904164  | 1 | 4032 tags=23%, list=16%, signal=27% |
| REACTOME_NRF_SIGNALS_CELL_DEATH_FROM_THE_NUCLEUS                                                        | 15  | 0.391797 | 0.793951 | 0.7241379  | 0.98826975 | 1 | 5467 tags=29%, list=21%, signal=37% |
| REACTOME_TRAFFICKING_OF_AMPA_RECEPTORS                                                                  | 25  | 0.353815 | 0.791745 | 0.72183098 | 0.9897952  | 1 | 410 tags=7%, list=2%, signal=7%     |
| REACTOME_INNATE_IMMUNE_SYSTEM                                                                           | 199 | 0.262118 | 0.79169  | 0.90247077 | 0.9871895  | 1 | 4756 tags=24%, list=18%, signal=29% |
| REACTOME_PLATELET_ACTIVATION_SIGNALING_AND_AGGREGATION                                                  | 183 | 0.27065  | 0.790907 | 0.8738502  | 0.9860624  | 1 | 4406 tags=14%, list=17%, signal=16% |
| REACTOME_TRANSCRIPTIONAL_REGULATION_OF_WHITE_ADIPOCYTE_DIFFERENTIATION                                  | 68  | 0.305295 | 0.786203 | 0.82182986 | 0.99220073 | 1 | 4756 tags=20%, list=19%, signal=24% |
| KEGG_CARDIAC_MUSCLE_CONTRACTION                                                                         | 59  | 0.305706 | 0.785053 | 0.82115084 | 0.99987906 | 1 | 6228 tags=32%, list=24%, signal=43% |
| REACTOME_METABOLISM_OF_RNA                                                                              | 274 | 0.256283 | 0.778546 | 0.94382024 | 1          | 1 | 6845 tags=31%, list=27%, signal=42% |
| KEGG_CHEMOKINE_SIGNALING_PATHWAY                                                                        | 155 | 0.26771  | 0.772236 | 0.8931909  | 1          | 1 | 7295 tags=29%, list=29%, signal=40% |
| REACTOME_GLYCEROPHOSPHOLIPID_BIOSYNTHESIS                                                               | 74  | 0.296212 | 0.7718   | 0.83557546 | 1          | 1 | 3031 tags=12%, list=12%, signal=13% |
| KEGG_TIGHT_JUNCTION                                                                                     | 117 | 0.274345 | 0.769347 | 0.8861314  | 1          | 1 | 4837 tags=22%, list=19%, signal=27% |
| REACTOME_SIGNALING_BY_FGFR1_FUSION_MUTANTS                                                              | 18  | 0.367146 | 0.768394 | 0.76842105 | 1          | 1 | 1677 tags=5%, list=7%, signal=5%    |
| REACTOME_CD28_CO_STIMULATION                                                                            | 30  | 0.337009 | 0.768171 | 0.7723577  | 1          | 1 | 7003 tags=44%, list=27%, signal=61% |
| REACTOME_PEPTIDE_CHAIN_ELONGATION                                                                       | 108 | 0.276174 | 0.767283 | 0.9101449  | 1          | 1 | 4756 tags=30%, list=15%, signal=33% |
| KEGG_TOLL_LIKE_RECEPTOR_SIGNALING_PATHWAY                                                               | 85  | 0.284372 | 0.766152 | 0.8539493  | 1          | 1 | 1959 tags=9%, list=8%, signal=10%   |
| REACTOME_ACTIVATION_OF_NMDA_RECEPTOR_UPON_GLUTAMATE_BINDING_AND_POSTSYNAPTIC_EVNTS                      | 36  | 0.319211 | 0.76369  | 0.7971474  | 1          | 1 | 3972 tags=19%, list=16%, signal=23% |
| BIOCARTA_ACTIN_PATHWAY                                                                                  | 20  | 0.354388 | 0.75125  | 0.79136693 | 1          | 1 | 1985 tags=10%, list=8%, signal=11%  |
| KEGG_VASOPRESSIN_REGULATED_WATER_REABSORPTION                                                           | 41  | 0.306725 | 0.746935 | 0.8398744  | 1          | 1 | 6131 tags=29%, list=24%, signal=38% |
| REACTOME_G1_PHASE                                                                                       | 36  | 0.316415 | 0.746304 | 0.8424437  | 1          | 1 | 1444 tags=11%, list=6%, signal=12%  |
| REACTOME_ACTIVATION_OF_ATR_IN_RESPONSE_TO_REPLICATION_STRESS                                            | 35  | 0.312086 | 0.744976 | 0.8338558  | 1          | 1 | 7671 tags=37%, list=30%, signal=53% |
| KEGG_BIOSYNTHESIS_OF_UNSATURATED_FATTY_ACIDS                                                            | 20  | 0.345718 | 0.741844 | 0.81157072 | 1          | 1 | 2554 tags=20%, list=10%, signal=22% |
| REACTOME_DNA_STRAND_ELONGATION                                                                          | 30  | 0.321354 | 0.741428 | 0.81692004 | 1          | 1 | 4536 tags=27%, list=18%, signal=32% |
| REACTOME_NEGATIVE_REGULATORS_OF_RIG_I_MDA5_SIGNALING                                                    | 31  | 0.321179 | 0.738558 | 0.8374793  | 1          | 1 | 4032 tags=16%, list=15%, signal=19% |
| REACTOME_PPARG_ACTIVATES_GENE_EXPRESSION                                                                | 98  | 0.270821 | 0.736611 | 0.92539454 | 1          | 1 | 4726 tags=20%, list=19%, signal=25% |
| REACTOME_ENERGY_DEPENDENT_REGULATION_OF_MTOR_BY_LKB1_AMPK                                               | 17  | 0.352533 | 0.736191 | 0.8077634  | 1          | 1 | 4996 tags=24%, list=20%, signal=29% |
| REACTOME_UNBLOCKING_OF_NMDA_RECEPTOR_GLUTAMATE_BINDING_AND_ACTIVATION                                   | 15  | 0.366194 | 0.732353 | 0.81395346 | 1          | 1 | 3396 tags=27%, list=13%, signal=31% |
| REACTOME_INTEGRATION_OF_ENERGY_METABOLISM                                                               | 104 | 0.263309 | 0.727346 | 0.9388972  | 1          | 1 | 3156 tags=13%, list=12%, signal=14% |
| REACTOME_MYD88_MAL_CASCADE_INITIATED_ON_PLASMA_MEMBRANE                                                 | 81  | 0.274715 | 0.727344 | 0.89522344 | 1          | 1 | 4312 tags=15%, list=17%, signal=18% |
| KEGG_LONG_TERM_POTENTIATION                                                                             | 65  | 0.281273 | 0.723506 | 0.8773006  | 1          | 1 | 3811 tags=18%, list=15%, signal=22% |
| REACTOME_GLUCCAGON_SIGNALING_IN_METABOLIC_REGULATION                                                    | 29  | 0.313815 | 0.722691 | 0.8241206  | 1          | 1 | 5544 tags=24%, list=22%, signal=31% |
| BIOCARTA_MPR_PATHWAY                                                                                    | 33  | 0.305272 | 0.720274 | 0.8474026  | 1          | 1 | 4010 tags=15%, list=16%, signal=18% |
| REACTOME_NONSENSE_MEDIATED_DECAY_ENHANCED_BY_THE_EXON_JUNCTION_COMPLEX                                  | 129 | 0.258674 | 0.720192 | 0.94017094 | 1          | 1 | 4416 tags=16%, list=17%, signal=19% |
| REACTOME_TRANSCRIPTION_COUPLED_NER_TC_NER                                                               | 44  | 0.294971 | 0.717555 | 0.8756278  | 1          | 1 | 4361 tags=18%, list=17%, signal=22% |
| REACTOME_NEF_MEDIATES_DOWN_MODULATION_OF_CELL_SURFACE_RECEPTORS_BY_RECRUITING_THEM_TO_CLATHRIN_ADAPTERS | 18  | 0.339436 | 0.716812 | 0.8344827  | 1          | 1 | 3014 tags=11%, list=12%, signal=13% |
| KEGG_GAP_JUNCTION                                                                                       | 82  | 0.266389 | 0.715417 | 0.93777776 | 1          | 1 | 5216 tags=24%, list=20%, signal=31% |
| REACTOME_SYNTHESIS_AND_INTERCONVERSION_OF_NUCLEOTIDE_DI_AND_TRIPHOSPHATES                               | 17  | 0.343497 | 0.714292 | 0.8298611  | 1          | 1 | 7076 tags=47%, list=28%, signal=65% |
| KEGG_DNA_REPLICATION                                                                                    | 36  | 0.300549 | 0.712964 | 0.87081337 | 1          | 1 | 5721 tags=25%, list=22%, signal=32% |
| REACTOME_AQUAPORIN_MEDIATED_TRANSPORT                                                                   | 43  | 0.295014 | 0.712322 | 0.8923328  | 1          | 1 | 5544 tags=23%, list=22%, signal=30% |
| REACTOME_G2_M_CHECKPOINTS                                                                               | 41  | 0.295785 | 0.711594 | 0.8901099  | 1          | 1 | 5860 tags=27%, list=23%, signal=35% |
| BIOCARTA_INTRINSIC_PATHWAY                                                                              | 18  | 0.33992  | 0.709666 | 0.8612521  | 1          | 1 | 3193 tags=28%, list=19%, signal=32% |
| BIOCARTA_INTEGRIN_PATHWAY                                                                               | 38  | 0.294555 | 0.709244 | 0.89621085 | 1          | 1 | 4943 tags=24%, list=13%, signal=29% |
| REACTOME_INHIBITION_OF_INSULIN_SECRETION_BY_ADRENALINE_NORADRENALINE                                    | 24  | 0.317919 | 0.709056 | 0.8545781  | 1          | 1 | 5120 tags=25%, list=20%, signal=31% |
| REACTOME_NUCLEOTIDE_BINDING_DOMAIN_LEUCINE_RICH_REPEAT_CONTAINING_RECEPTOR_NLR_SIGNALLING_PATHWAYS      | 44  | 0.285039 | 0.703516 | 0.9018692  | 1          | 1 | 3837 tags=16%, list=15%, signal=19% |
| KEGG_FATTY_ACID_METABOLISM                                                                              | 37  | 0.29585  | 0.703329 | 0.8659794  | 1          | 1 | 3976 tags=16%, list=16%, signal=19% |
| KEGG_ADIPOCYTOKINE_SIGNALING_PATHWAY                                                                    | 60  | 0.272976 | 0.703197 | 0.9178515  | 1          | 1 | 1682 tags=7%, list=7%, signal=7%    |
| BIOCARTA_NOS1_PATHWAY                                                                                   | 20  | 0.320737 | 0.702329 | 0.8583916  | 1          | 1 | 4010 tags=20%, list=16%, signal=24% |
| REACTOME_RNA_POL_III_CHAIN_ELONGATION                                                                   | 17  | 0.325353 | 0.697004 | 0.85561496 | 1          | 1 | 5620 tags=41%, list=22%, signal=53% |
| REACTOME_NFKB_AND_MAP_KINASES_ACTIVATION_MEDIATED_BY_TLR4_SIGNALING_REPERTOIRE                          | 71  | 0.268627 | 0.696846 | 0.9411765  | 1          | 1 | 4312 tags=15%, list=17%, signal=19% |
| REACTOME_TRAFFICKING_OF_GLUR2_CONTAINING_AMPA_RECEPTORS                                                 | 15  | 0.333374 | 0.696731 | 0.8531952  | 1          | 1 | 4602 tags=33%, list=18%, signal=41% |
| KEGG_CELL_CYCLE                                                                                         | 123 | 0.248222 | 0.696488 | 0.97179127 | 1          | 1 | 6377 tags=28%, list=25%, signal=38% |
| REACTOME_G_ALPHA1213_SIGNALING_EVENTS                                                                   | 72  | 0.262559 | 0.696485 | 0.9425626  | 1          | 1 | 3239 tags=14%, list=13%, signal=16% |
| REACTOME_RNA_POL_III_TRANSCRIPTION_INITIATION_AMP_TYPE_3_PROMOTER                                       | 26  | 0.307167 | 0.692975 | 0.87261146 | 1          | 1 | 4696 tags=31%, list=18%, signal=38% |
| REACTOME_BASE_EXCISION_REPAIR                                                                           | 19  | 0.320773 | 0.692611 | 0.8544096  | 1          | 1 | 590 tags=5%, list=2%, signal=5%     |
| REACTOME_LATENT_INFECTON_OF_HOMO_SAPIENS_WITH_MYCOBACTERIUM_TUBERCULOSIS                                | 29  | 0.300828 | 0.691318 | 0.88566554 | 1          | 1 | 4014 tags=24%, list=16%, signal=25% |
| REACTOME_REGULATION_OF_INSULIN_SECRETION                                                                | 79  | 0.25598  | 0.689401 | 0.9482014  | 1          | 1 | 3031 tags=11%, list=12%, signal=13% |
| REACTOME_THROMBOXANE_SIGNALING_THROUGH_TP_RECEPTOR                                                      | 22  | 0.31396  | 0.688438 | 0.8836425  | 1          | 1 | 4894 tags=27%, list=19%, signal=34% |
| REACTOME_NUCLEOTIDE_EXCISION_REPAIR                                                                     | 49  | 0.277517 | 0.684542 | 0.9220986  | 1          | 1 | 4361 tags=16%, list=17%, signal=20% |
| KEGG_PROANOATE_METABOLISM                                                                               | 32  | 0.300051 | 0.682703 | 0.9086116  | 1          | 1 | 3497 tags=19%, list=14%, signal=22% |
| REACTOME_RESOLUTION_OF_AP_SITES_VIA_THE_MULTIPLE_NUCLEOTIDE_PATCH_REPLACEMENT_PATHWAY                   | 17  | 0.331592 | 0.682479 | 0.86013985 | 1          | 1 | 590 tags=6%, list=2%, signal=6%     |
| REACTOME_NOTCH1_INTRACELLULAR_DOMAIN_REGULATES_TRANSCRIPTION                                            | 45  | 0.281861 | 0.680661 | 0.9241706  | 1          | 1 | 5082 tags=22%, list=20%, signal=28% |
| REACTOME_THROMBIN_SIGNALING_THROUGH_PROTEINASE_ACTIVATED_RECEPTORS_PARS                                 | 30  | 0.291909 | 0.679698 | 0.9070946  | 1          | 1 | 4894 tags=23%, list=19%, signal=29% |
| REACTOME_LIPID_DIGESTION_MOBILIZATION_AND_TRANSPORT                                                     | 35  | 0.282035 | 0.679328 | 0.91515892 | 1          | 1 | 216 tags=3%, list=1%, signal=3%     |
| KEGG_LONG_TERM_DEPRESSION                                                                               | 59  | 0.268249 | 0.675805 | 0.9555921  | 1          | 1 | 3659 tags=19%, list=14%, signal=22% |
| REACTOME_NGF_SIGNALING_VIA_TRKA_FROM_THE_PLASMA_MEMBRANE                                                | 129 | 0.238959 | 0.674494 | 0.9869754  | 1          | 1 | 4260 tags=33%, list=17%, signal=19% |
| REACTOME_LOSS_OF_NLP_FROM_MITOTIC_CENTROSOMES                                                           | 56  | 0.266325 | 0.671147 | 0.9344512  | 1          | 1 | 7430 tags=39%, list=29%, signal=55% |
| BIOCARTA_FAS_PATHWAY                                                                                    | 29  | 0.287691 | 0.663761 | 0.9095652  | 1          | 1 | 586 tags=3%, list=2%, signal=4%     |
| KEGG_VASCULAR_SMOOTH_MUSCLE_CONTRACTION                                                                 | 97  | 0.241399 | 0.662976 | 0.9851852  | 1          | 1 | 3811 tags=16%, list=15%, signal=19% |
| REACTOME_PROTEIN_FOLDING                                                                                | 50  | 0.26514  | 0.662704 | 0.95961225 | 1          | 1 | 5216 tags=26%, list=20%, signal=33% |
| KEGG_BASE_EXCISION_REPAIR                                                                               | 34  | 0.282527 | 0.662322 | 0.9325658  | 0.99992186 | 1 | 5611 tags=26%, list=26%, signal=34% |
| REACTOME_MITOTIC_G2_M_PHASES                                                                            | 78  | 0.244171 | 0.658318 | 0.98121387 | 1          | 1 | 6544 tags=31%, list=26%, signal=41% |
| REACTOME_RECRUITMENT_OF_MITOTIC_CENTROSOME_PROTEINS_AND_COMPLEXES                                       | 63  | 0.248583 | 0.648792 | 0.9727273  | 1          | 1 | 7430 tags=38%, list=29%, signal=54% |
| KEGG_ONE_CARBON_POOL_BY_FOLATE                                                                          | 17  | 0.312031 | 0.647882 | 0.899115   | 1          | 1 | 3780 tags=18%, list=15%, signal=21% |
| BIOCARTA_TNFR2_PATHWAY                                                                                  | 17  | 0.300952 | 0.64111  | 0.9029982  | 1          | 1 | 2489 tags=12%, list=10%, signal=13% |
| REACTOME_CTNB1_PHOSPHORYLATION_CASCADE                                                                  | 15  | 0.314239 | 0.638467 | 0.90017515 | 1          | 1 | 6447 tags=33%, list=25%, signal=45% |
| KEGG_BETA_ALANINE_METABOLISM                                                                            | 20  | 0.295497 | 0.637264 | 0.9255499  | 1          | 1 | 4089 tags=20%, list=16%, signal=24% |
| REACTOME_REGULATION_OF_WATER_BALANCE_BY_RENAL_AQUAPORINS                                                | 38  | 0.264926 | 0.637239 | 0.93771046 | 1          | 1 | 5544 tags=24%, list=22%, signal=30% |
| BIOCARTA_GPCR_PATHWAY                                                                                   | 33  | 0.276447 | 0.636476 | 0.93791944 | 1          | 1 | 4010 tags=18%, list=16%, signal=22% |
| REACTOME_MYOGENESIS                                                                                     | 22  | 0.289066 | 0.631216 | 0.92691624 | 1          | 1 | 5380 tags=23%, list=21%, signal=29% |
| REACTOME_SIGNALING_BY_NOTCH1                                                                            | 68  | 0.237348 | 0.621752 | 0.9782271  | 1          | 1 | 4334 tags=18%, list=17%, signal=21% |
| REACTOME_CTLA4_INHIBITORY_SIGNALING                                                                     | 19  | 0.291152 | 0.620857 | 0.9201331  | 1          | 1 | 6447 tags=32%, list=25%, signal=42% |
| REACTOME_DOWNSTREAM_SIGNALING_EVENTS_OF_B_CELL_RECEPTOR_BCR                                             | 92  | 0.230357 | 0.619251 | 0.9884058  | 1          | 1 | 6059 tags=26%, list=24%, signal=34% |
| KEGG_TYROSINE_METABOLISM                                                                                | 37  | 0.295039 | 0.613437 | 0.9736842  | 1          | 1 | 4850 tags=30%, list=19%, signal=37% |
| REACTOME_SIGNAL_AMPLIFICATION                                                                           | 29  | 0.28354  | 0.607643 | 0.9378151  | 1          | 1 | 5467 tags=24%, list=21%, signal=31% |
| BIOCARTA_PSHYPOXIA_PATHWAY                                                                              | 22  | 0.274569 | 0.598838 | 0.94954956 | 1          | 1 | 4465 tags=23%, list=17%, signal=28% |
| BIOCARTA_IL2_PATHWAY                                                                                    | 21  | 0.266801 | 0.572123 | 0.9052573  | 1          | 1 | 4756 tags=19%, list=19%, signal=23% |
| REACTOME_SEMA4D_INDUCED_CELL_MIGRATION_AND_GROWTH_CONE_COLLAPSE                                         | 25  | 0.255286 | 0.566477 | 0.96940416 | 1          | 1 | 1993 tags=8%, list=8%, signal=8%    |
| REACTOME_CYCLIN_A_B1_ASSOCIATED_EVENTS_DURING_G2_M_TRANSITION                                           | 15  | 0.276371 | 0.562698 | 0.9422383  | 1          | 1 | 5695 tags=33%, list=22%, signal=43% |
| REACTOME_TRANSPORT_OF_MATURE_TRANSCRIPT_TO_CYTOPLASM                                                    | 51  | 0.218359 | 0.546356 | 0.9953344  | 1          | 1 | 7857 tags=33%, list=31%, signal=48% |
| REACTOME_ACTIVATED_AMPK_STIMULATES_FATTY_ACID_OXIDATION_IN_MUSCLE                                       | 18  | 0.253547 | 0.534824 | 0.9770723  | 1          | 1 | 892 tags=6%, list=3%, signal=6%     |
| REACTOME_METABOLISM_OF_VITAMINS_AND_COFACTORS                                                           | 51  | 0.213589 | 0.53472  | 0.9921875  | 1          | 1 | 3830 tags=12%, list=15%, signal=14% |
| KEGG_BASAL_TRANSCRIPTION_FACTORS                                                                        | 33  | 0.230495 | 0.531035 | 0.992      | 1          | 1 | 5792 tags=18%, list=23%, signal=23% |
| REACTOME_A_TETRASACCHARIDE_LINKER_SEQUENCE_IS_REQUIRED_FOR_GAG_SYNTHESIS                                | 25  | 0.238686 | 0.524326 | 0.99319726 | 1          | 1 | 6709 tags=36%, list=26%, signal=49% |
| KEGG_LYSOSOME                                                                                           | 118 | 0.183579 | 0.511115 | 1          | 1          | 1 | 6416 tags=25%, list=25%, signal=34% |
| REACTOME_PKA_MEDIATED_PHOSPHORYLATION_OF_CREB                                                           | 15  | 0.225    | 0.506549 | 0.98761064 | 1          | 1 | 5544 tags=25%, list=22%, signal=34% |
| BIOCARTA_P38MAPK_PATHWAY                                                                                | 39  | 0.210427 | 0.501706 | 1          | 1          | 1 | 4756 tags=13%, list=15%, signal=16% |
| BIOCARTA_MITOCHONDRIA_PATHWAY                                                                           | 21  | 0.234342 | 0.501085 | 0.9829642  | 1          | 1 | 3730 tags=14%, list=15%, signal=17% |
| KEGG_HOMOLOGOUS_RECOMBINATION                                                                           | 26  | 0.22136  | 0.498689 | 0.98694944 | 1          | 1 | 975 tags=4%, list=4%, signal=4%     |
| BIOCARTA_CHREBP2_PATHWAY                                                                                | 30  | 0.204844 | 0.494083 | 0.99517685 | 1          | 1 | 2292 tags=8%, list=9%, signal=8%    |
| REACTOME_SEMA4D_IN_SEMAPHORIN_SIGNALING                                                                 | 30  | 0.212383 | 0.490236 | 0.99169433 | 0.998529   | 1 | 1993 tags=7%, list=8%, signal=7%    |
| KEGG_RNA_DEGRADATION                                                                                    | 53  | 0.190189 | 0.484336 | 0.99841267 | 0.9969448  | 1 | 3943 tags=11%, list=15%, signal=13% |
| REACTOME_SIGNALING_BY_BMP                                                                               | 21  | 0.211124 | 0.45915  | 0.98967296 | 0.99678284 | 1 | 5637 tags=24%, list=22%, signal=31% |

**Table S10**  
**GSEA Analysis on HNSC cancer cell lines comparing cell lines with or without 9p21.3 loss (arm or focal),**  
**Pathways Depleted**

| NAME                                                                                  | SIZE | ES       | NES      | NOM p-Value | FDR q-Value | FWER p-Value | RANK AT MAX |
|---------------------------------------------------------------------------------------|------|----------|----------|-------------|-------------|--------------|-------------|
| SENESCENCE_ASSOCIATED_SECRETORY_PHENOTYPE                                             | 51   | -0.78458 | -2.17592 | 0           | 0           | 0            | 2818        |
| KEGG_CYTOKINE_CYTOKINE_RECEPTOR_INTERACTION                                           | 192  | -0.5017  | -1.72496 | 0           | 0.64153993  | 0.697        | 3133        |
| REACTOME_BILE_ACID_AND_BILE_SALT_METABOLISM                                           | 23   | -0.71864 | -1.68964 | 0.00952381  | 0.6409758   | 0.837        | 565         |
| REACTOME_SIGNALING_BY_HIPPO                                                           | 20   | -0.71361 | -1.66068 | 0.01946472  | 0.6629962   | 0.924        | 1698        |
| REACTOME_CHEMOKINE_RECEPTORS_BIND_CHEMOKINES                                          | 35   | -0.64063 | -1.64026 | 0.007692308 | 0.6528666   | 0.96         | 1387        |
| KEGG_GLYCOSPHINGOLIPID_BIOSYNTHESIS_GANGLIO_SERIES                                    | 15   | -0.74765 | -1.63676 | 0.027542373 | 0.5652866   | 0.963        | 2650        |
| REACTOME_DEGRADATION_OF_THE_EXTRACELLULAR_MATRIX                                      | 26   | -0.66388 | -1.62693 | 0.018518519 | 0.53538847  | 0.974        | 3465        |
| BIOCARTA_NTHI_PATHWAY                                                                 | 23   | -0.68215 | -1.6259  | 0.02173913  | 0.4731624   | 0.973        | 374         |
| KEGG_PANTOTHENATE_AND_COA_BIOSYNTHESIS                                                | 15   | -0.73479 | -1.5942  | 0.027713627 | 0.5736192   | 0.999        | 2248        |
| BIOCARTA_IL1R_PATHWAY                                                                 | 33   | -0.62444 | -1.58528 | 0.013850415 | 0.5587936   | 0.999        | 3128        |
| BIOCARTA_IL10_PATHWAY                                                                 | 16   | -0.69405 | -1.56933 | 0.03640777  | 0.5820398   | 1            | 2803        |
| KEGG_NOD LIKE_RECEPTOR_SIGNALING_PATHWAY                                              | 54   | -0.5555  | -1.5417  | 0.022160664 | 0.66784996  | 1            | 3213        |
| REACTOME_UNFOLDED_PROTEIN_RESPONSE                                                    | 76   | -0.52139 | -1.5358  | 0.002906977 | 0.64771     | 1            | 3682        |
| REACTOME_ACTIVATION_OF_GENES_BY_ATF4                                                  | 24   | -0.65094 | -1.52842 | 0.039443154 | 0.6385009   | 1            | 1843        |
| REACTOME_IL1_SIGNALING                                                                | 38   | -0.57482 | -1.51709 | 0.026455026 | 0.652598    | 1            | 3213        |
| REACTOME_DESTABILIZATION_OF_MRNA_BY_TRISTETRAPROLIN_TTP                               | 17   | -0.69289 | -1.51668 | 0.04090909  | 0.6142278   | 1            | 1843        |
| REACTOME_DIABETES_PATHWAYS                                                            | 121  | -0.47113 | -1.50756 | 0.003401361 | 0.61802757  | 1            | 3682        |
| BIOCARTA_INFLAM_PATHWAY                                                               | 19   | -0.663   | -1.50589 | 0.05263158  | 0.5900839   | 1            | 4562        |
| REACTOME_GLYCOSPHINGOLIPID_METABOLISM                                                 | 32   | -0.57711 | -1.49357 | 0.025943397 | 0.6133317   | 1            | 4028        |
| REACTOME_PERK_REGULATED_GENE_EXPRESSION                                               | 27   | -0.59888 | -1.49041 | 0.04292929  | 0.5957531   | 1            | 1843        |
| REACTOME_INSULIN_SYNTHESIS_AND_PROCESSING                                             | 18   | -0.67034 | -1.48716 | 0.05936073  | 0.5812557   | 1            | 3066        |
| REACTOME_CYTOSOLIC_TRNA_AMINOACYLATION                                                | 24   | -0.60789 | -1.46884 | 0.047281325 | 0.63391376  | 1            | 5586        |
| BIOCARTA_CARDIACEGF_PATHWAY                                                           | 17   | -0.66098 | -1.46853 | 0.064665124 | 0.6077781   | 1            | 2049        |
| KEGG_JAK_STAT_SIGNALING_PATHWAY                                                       | 119  | -0.45683 | -1.46711 | 0.006644518 | 0.5883832   | 1            | 2986        |
| BIOCARTA_CCR5_PATHWAY                                                                 | 16   | -0.67326 | -1.46374 | 0.08411215  | 0.5778716   | 1            | 3622        |
| REACTOME_GROWTH_HORMONE_RECEPTOR_SIGNALING                                            | 20   | -0.62341 | -1.459   | 0.08056872  | 0.5746095   | 1            | 3843        |
| REACTOME_GRB2_EVENTS_IN_ERBB2_SIGNALING                                               | 22   | -0.62243 | -1.45494 | 0.05140187  | 0.56986964  | 1            | 809         |
| KEGG_STEROID_BIOSYNTHESIS                                                             | 16   | -0.65482 | -1.43354 | 0.07042254  | 0.63690263  | 1            | 2164        |
| REACTOME_SHC1_EVENTS_IN_ERBB4_SIGNALING                                               | 20   | -0.60637 | -1.42405 | 0.09046455  | 0.6541453   | 1            | 1545        |
| REACTOME_ACTIVATION_OF_BH3_ONLY_PROTEINS                                              | 16   | -0.61962 | -1.41864 | 0.09134615  | 0.654754    | 1            | 3561        |
| KEGG_CYTOSOLIC_DNA_SENSING_PATHWAY                                                    | 42   | -0.51974 | -1.41837 | 0.038674034 | 0.63479376  | 1            | 383         |
| REACTOME_ANTIGEN_PRESENTATION_FOLDING_ASSEMBLY_AND_PEPTIDE_LOADING_OF_CLASS_I_MHC     | 15   | -0.6509  | -1.41791 | 0.06823529  | 0.61653024  | 1            | 4863        |
| REACTOME_DESTABILIZATION_OF_MRNA_BY_BRF1                                              | 17   | -0.63866 | -1.4121  | 0.107913665 | 0.621837    | 1            | 1843        |
| REACTOME_SYNTHESIS_OF_BILE_ACIDS_AND_BILE_SALTS                                       | 16   | -0.63288 | -1.40151 | 0.07981221  | 0.64661723  | 1            | 565         |
| REACTOME_SPHINGOLIPID_METABOLISM                                                      | 58   | -0.4828  | -1.35851 | 0.07012987  | 0.81679744  | 1            | 4028        |
| REACTOME_RAP1_SIGNALING                                                               | 15   | -0.61959 | -1.35347 | 0.11111111  | 0.817296    | 1            | 1669        |
| KEGG_BLADDER_CANCER                                                                   | 40   | -0.49848 | -1.35323 | 0.089058526 | 0.7965036   | 1            | 3640        |
| REACTOME_AMINO_ACID_AND_OLIGOPEPTIDE_SLC_TRANSPORTERS                                 | 39   | -0.51584 | -1.34685 | 0.08478803  | 0.8051114   | 1            | 1078        |
| BIOCARTA_TOB1_PATHWAY                                                                 | 15   | -0.61235 | -1.34295 | 0.11648352  | 0.8027014   | 1            | 6134        |
| REACTOME_PRE_NOTCH_PROCESSING_IN_GOLGI                                                | 16   | -0.60241 | -1.3421  | 0.11111111  | 0.78618205  | 1            | 1457        |
| REACTOME_BOTULINUM_NEUROTOXICITY                                                      | 18   | -0.58246 | -1.3413  | 0.14186047  | 0.77120435  | 1            | 3392        |
| REACTOME_SHC1_EVENTS_IN_EGFR_SIGNALING                                                | 15   | -0.61863 | -1.34109 | 0.12107623  | 0.7537293   | 1            | 3546        |
| REACTOME_NUCLEAR_SIGNALING_BY_ERBB4                                                   | 33   | -0.52025 | -1.33942 | 0.11764706  | 0.74291164  | 1            | 3100        |
| BIOCARTA_G1_PATHWAY                                                                   | 28   | -0.53841 | -1.33444 | 0.10930233  | 0.7475818   | 1            | 3640        |
| REACTOME_SIGNALING_BY_NODAL                                                           | 15   | -0.60018 | -1.33109 | 0.13777778  | 0.7434885   | 1            | 3396        |
| REACTOME_ACTIVATION_OF_CHAPERONE_GENES_BY_XBP1S                                       | 44   | -0.4947  | -1.31581 | 0.10962567  | 0.79034215  | 1            | 3585        |
| REACTOME_PROTEOLYTIC_CLEAVAGE_OF_SNARE_COMPLEX_PROTEINS                               | 16   | -0.60328 | -1.31301 | 0.1485849   | 0.7859284   | 1            | 3392        |
| REACTOME_TRNA_AMINOACYLATION                                                          | 42   | -0.47725 | -1.30805 | 0.08746356  | 0.78962204  | 1            | 7329        |
| BIOCARTA_IGF1MOTOR_PATHWAY                                                            | 20   | -0.55706 | -1.30408 | 0.14868106  | 0.79016745  | 1            | 1084        |
| REACTOME_REGULATION_OF_BETA_CELL_DEVELOPMENT                                          | 20   | -0.57063 | -1.30304 | 0.12177986  | 0.7789526   | 1            | 101         |
| BIOCARTA_BIOPEPTIDES_PATHWAY                                                          | 39   | -0.48886 | -1.29675 | 0.11851852  | 0.789896    | 1            | 2779        |
| REACTOME_ION_CHANNEL_TRANSPORT                                                        | 40   | -0.48697 | -1.29588 | 0.11358025  | 0.778584    | 1            | 1519        |
| KEGG_ADHERENS_JUNCTION                                                                | 66   | -0.44603 | -1.28371 | 0.07058824  | 0.8153611   | 1            | 2422        |
| BIOCARTA_IL22BP_PATHWAY                                                               | 15   | -0.58041 | -1.28025 | 0.1670429   | 0.81481624  | 1            | 2474        |
| KEGG_SNARE_INTERACTIONS_IN_VESICULAR_TRANSPORT                                        | 38   | -0.48961 | -1.27998 | 0.12958436  | 0.8010514   | 1            | 4941        |
| BIOCARTA_MTOR_PATHWAY                                                                 | 23   | -0.54278 | -1.27733 | 0.15254237  | 0.7975162   | 1            | 10          |
| KEGG_ABC_TRANSPORTERS                                                                 | 41   | -0.4855  | -1.27342 | 0.12953368  | 0.7986073   | 1            | 3184        |
| REACTOME_PKB_MEDIATED_EVENTS                                                          | 28   | -0.50921 | -1.27294 | 0.16504854  | 0.78696555  | 1            | 10          |
| BIOCARTA_EIF_PATHWAY                                                                  | 16   | -0.58704 | -1.27179 | 0.19310345  | 0.778332    | 1            | 3149        |
| REACTOME_GENERATION_OF_SECOND_MESSENGER_MOLECULES                                     | 18   | -0.56213 | -1.27159 | 0.1879518   | 0.7662122   | 1            | 5385        |
| REACTOME_AMINE_COMPOUND_SLC_TRANSPORTERS                                              | 18   | -0.54682 | -1.26079 | 0.18203309  | 0.7974001   | 1            | 2181        |
| KEGG_EPITHELIAL_CELL_SIGNALING_IN_HELICOBACTER_PYLORI_INFECTION                       | 64   | -0.42532 | -1.25212 | 0.11171662  | 0.8188745   | 1            | 2779        |
| REACTOME_INTRINSIC_PATHWAY_FOR_APOPTOSIS                                              | 29   | -0.50293 | -1.24816 | 0.17091836  | 0.82217526  | 1            | 4395        |
| KEGG_VIRAL_MYOCARDITIS                                                                | 41   | -0.45657 | -1.2462  | 0.15206185  | 0.8175235   | 1            | 4395        |
| REACTOME_AMINO_ACID_TRANSPORT_ACROSS_THE_PLASMA_MEMBRANE                              | 26   | -0.50453 | -1.24021 | 0.17848411  | 0.827238    | 1            | 996         |
| REACTOME_Glutamate_NEUROTRANSMITTER_RELEASE_CYCLE                                     | 15   | -0.57283 | -1.23644 | 0.18485524  | 0.83017355  | 1            | 96          |
| REACTOME_FORMATION_OF_INCISION_COMPLEX_IN_GG_NER                                      | 21   | -0.52866 | -1.23625 | 0.20179372  | 0.81872016  | 1            | 6499        |
| BIOCARTA_AGR_PATHWAY                                                                  | 34   | -0.47956 | -1.23398 | 0.19900498  | 0.81527966  | 1            | 1127        |
| KEGG_RIG_I LIKE_RECEPTOR_SIGNALING_PATHWAY                                            | 55   | -0.43186 | -1.22046 | 0.15789473  | 0.85688514  | 1            | 4953        |
| REACTOME_SHC_MEDIATED_SIGNALING                                                       | 15   | -0.55442 | -1.21907 | 0.2260274   | 0.85035044  | 1            | 3546        |
| BIOCARTA_TEL_PATHWAY                                                                  | 18   | -0.54131 | -1.21745 | 0.22931442  | 0.8444314   | 1            | 4376        |
| KEGG_UBIQUITIN_MEDIATED_PROTEOLYSIS                                                   | 128  | -0.37685 | -1.21283 | 0.12014134  | 0.85079575  | 1            | 4109        |
| REACTOME_GASTRIN_CREB_SIGNALING_PATHWAY_VIA_PKC_AND_MAPK                              | 155  | -0.36736 | -1.20691 | 0.08802817  | 0.8638452   | 1            | 3777        |
| REACTOME_Glutathione_CONJUGATION                                                      | 19   | -0.53192 | -1.20373 | 0.27051     | 0.8637716   | 1            | 485         |
| REACTOME_COSTIMULATION_BY_THE_CD28_FAMILY                                             | 51   | -0.43897 | -1.20298 | 0.21276596  | 0.8550459   | 1            | 4688        |
| KEGG_COMPLEMENT_AND_COAGULATION_CASCADES                                              | 51   | -0.424   | -1.19436 | 0.17816092  | 0.8777522   | 1            | 752         |
| REACTOME_ANTIGEN_ACTIVATES_B_CELL_RECEPTOR_LEADING_TO_GENERATION_OF_SECOND_MESSENGERS | 29   | -0.47411 | -1.19196 | 0.200489    | 0.87619543  | 1            | 2049        |
| REACTOME_CHOLESTEROL_BIOSYNTHESIS                                                     | 20   | -0.51398 | -1.19057 | 0.25526932  | 0.87011504  | 1            | 5482        |
| BIOCARTA_STATHMIN_PATHWAY                                                             | 16   | -0.54363 | -1.18571 | 0.2665148   | 0.87849721  | 1            | 5405        |
| REACTOME_SMOOTH_MUSCLE_CONTRACTION                                                    | 23   | -0.50655 | -1.18159 | 0.23376623  | 0.8843391   | 1            | 2084        |
| REACTOME_PTM_GAMMA_CARBOXYLATION_HYPUSINE_FORMATION_AND_ARYLSULFATASE_ACTIVATION      | 21   | -0.50317 | -1.18044 | 0.2451923   | 0.8779067   | 1            | 2204        |
| KEGG_ALZHEIMERS_DISEASE                                                               | 137  | -0.3657  | -1.17194 | 0.15309446  | 0.90151817  | 1            | 1282        |
| REACTOME_PEPTIDE_LIGAND_BINDING_RECEPTORS                                             | 106  | -0.36919 | -1.15502 | 0.17610063  | 0.9593367   | 1            | 1554        |
| REACTOME_CLASS_A1_RHODOPSIN LIKE_RECEPTORS                                            | 179  | -0.34355 | -1.15388 | 0.14457831  | 0.9528445   | 1            | 1949        |
| REACTOME_TAK1_ACTIVATES_NFKB_BY_PHOSPHORYLATION_AND_ACTIVATION_OF_IKKS_COMPLEX        | 23   | -0.47444 | -1.1487  | 0.27525252  | 0.9622248   | 1            | 4870        |
| REACTOME_PIP3_ACTIVATES_AKT_SIGNALING                                                 | 27   | -0.45835 | -1.14853 | 0.2725061   | 0.9516227   | 1            | 5461        |
| REACTOME_POST_TRANSLATIONAL_MODIFICATION_SYNTHESIS_OF_GPI_ANCHORED_PROTEINS           | 26   | -0.4723  | -1.14803 | 0.27272728  | 0.94270134  | 1            | 2960        |
| REACTOME_SIGNALING_BY_ERBB4                                                           | 83   | -0.37438 | -1.14219 | 0.19402985  | 0.9550951   | 1            | 4870        |
| KEGG_TYPE_I_DIABETES_MELLITUS                                                         | 17   | -0.50106 | -1.14111 | 0.2867647   | 0.9489478   | 1            | 374         |
| KEGG_AMINOACYL_TRNA_BIOSYNTHESIS                                                      | 41   | -0.43631 | -1.14099 | 0.25593668  | 0.9389376   | 1            | 5911        |
| REACTOME_PEROXISOMAL_LIPID_METABOLISM                                                 | 20   | -0.49636 | -1.13889 | 0.30904523  | 0.9375294   | 1            | 3090        |
| REACTOME_ASPARAGINE_N_LINKED_GLYCOSYLATION                                            | 79   | -0.38014 | -1.13332 | 0.23964497  | 0.94997895  | 1            | 4901        |
| KEGG_RIBOSOME                                                                         | 86   | -0.37229 | -1.13237 | 0.23493975  | 0.94339454  | 1            | 2730        |
| BIOCARTA_PML_PATHWAY                                                                  | 16   | -0.50987 | -1.13196 | 0.30935252  | 0.935073    | 1            | 5039        |

|                                                                                                                                 |     |          |          |            |             |   |      |
|---------------------------------------------------------------------------------------------------------------------------------|-----|----------|----------|------------|-------------|---|------|
| REACTOME_NEUROTRANSMITTER_RELEASE_CYCLE                                                                                         | 27  | -0.45141 | -1.12964 | 0.31026253 | 0.93379277  | 1 | 3468 |
| KEGG_APOPTOSIS                                                                                                                  | 82  | -0.3707  | -1.12718 | 0.24362606 | 0.93340075  | 1 | 4870 |
| BIOCARTA_ARAP_PATHWAY                                                                                                           | 17  | -0.50256 | -1.12588 | 0.31381732 | 0.928381    | 1 | 2320 |
| REACTOME_TRAF6_MEDIATED_NFKB_ACTIVATION                                                                                         | 21  | -0.48862 | -1.12468 | 0.3101737  | 0.92327595  | 1 | 5414 |
| REACTOME_PI3K_EVENTS_IN_ERBB4_SIGNALING                                                                                         | 36  | -0.42433 | -1.12244 | 0.2543641  | 0.92342484  | 1 | 5034 |
| KEGG_PEROXISOME                                                                                                                 | 75  | -0.3751  | -1.11664 | 0.24852072 | 0.93679214  | 1 | 3793 |
| REACTOME_SIGNALING_BY_GPCR                                                                                                      | 446 | -0.30338 | -1.11042 | 0.14569536 | 0.9510424   | 1 | 1949 |
| KEGG_GNRH_SIGNALING_PATHWAY                                                                                                     | 90  | -0.36524 | -1.10516 | 0.26666668 | 0.9623404   | 1 | 3622 |
| KEGG_ERBB_SIGNALING_PATHWAY                                                                                                     | 85  | -0.36778 | -1.10411 | 0.24293785 | 0.95717233  | 1 | 3318 |
| BIOCARTA_RELA_PATHWAY                                                                                                           | 16  | -0.50789 | -1.10305 | 0.31506848 | 0.9518538   | 1 | 4870 |
| REACTOME_BIOSYNTHESIS_OF_THE_N_GLYCAN_PRECURSOR_DOLICHOL_LIPID_LINKED_OLIGOSACCHARI<br>DE_LLO_AND_TRANSFER_TO_A_NASCENT_PROTEIN | 28  | -0.44149 | -1.10142 | 0.31042653 | 0.9490436   | 1 | 5280 |
| REACTOME_SIGNALING_TO_RAS                                                                                                       | 27  | -0.4637  | -1.10075 | 0.33793104 | 0.94278616  | 1 | 4676 |
| REACTOME_PURINE_METABOLISM                                                                                                      | 31  | -0.43708 | -1.09468 | 0.31782946 | 0.95706284  | 1 | 1953 |
| BIOCARTA_CELLCYCLE_PATHWAY                                                                                                      | 23  | -0.46085 | -1.09169 | 0.33568075 | 0.9597506   | 1 | 4006 |
| REACTOME_GLOBAL_GENOMIC_NER_GG_NER                                                                                              | 33  | -0.42752 | -1.08948 | 0.32843137 | 0.95921445  | 1 | 6499 |
| REACTOME_PI3K_EVENTS_IN_ERBB2_SIGNALING                                                                                         | 42  | -0.41481 | -1.08707 | 0.31578946 | 0.95946663  | 1 | 809  |
| KEGG_PPAR_SIGNALING_PATHWAY                                                                                                     | 59  | -0.37115 | -1.08186 | 0.31989247 | 0.9700675   | 1 | 835  |
| BIOCARTA_SPRY_PATHWAY                                                                                                           | 18  | -0.46819 | -1.07968 | 0.3476298  | 0.9698046   | 1 | 4042 |
| KEGG_LYSINE_DEGRADATION                                                                                                         | 39  | -0.40624 | -1.07847 | 0.32048193 | 0.96604973  | 1 | 1590 |
| KEGG_GLYCINE_SERINE_AND_THREONINE_METABOLISM                                                                                    | 28  | -0.43346 | -1.07693 | 0.3478261  | 0.9636791   | 1 | 2998 |
| KEGG_WNT_SIGNALING_PATHWAY                                                                                                      | 139 | -0.3304  | -1.07518 | 0.27972028 | 0.9614057   | 1 | 1689 |
| KEGG_GLIOMA                                                                                                                     | 65  | -0.36599 | -1.07291 | 0.32777777 | 0.96178913  | 1 | 4376 |
| REACTOME_AMINE_LIGAND_BINDING_RECEPTORS                                                                                         | 21  | -0.46299 | -1.06601 | 0.3770115  | 0.97892004  | 1 | 1437 |
| KEGG_PRION_DISEASES                                                                                                             | 28  | -0.42456 | -1.06286 | 0.39141414 | 0.9831543   | 1 | 4289 |
| REACTOME_EXTRACELLULAR_MATRIX_ORGANIZATION                                                                                      | 79  | -0.36069 | -1.05906 | 0.32173914 | 0.9891139   | 1 | 4547 |
| KEGG_PYRIMIDINE_METABOLISM                                                                                                      | 91  | -0.3448  | -1.05738 | 0.32218844 | 0.9876187   | 1 | 1648 |
| KEGG_MAPK_SIGNALING_PATHWAY                                                                                                     | 243 | -0.30641 | -1.05419 | 0.2764977  | 0.9915983   | 1 | 4212 |
| REACTOME_SIGNALING_BY_ILS                                                                                                       | 101 | -0.3385  | -1.05342 | 0.33116883 | 0.9860404   | 1 | 3213 |
| KEGG_MELANOGENESIS                                                                                                              | 94  | -0.33279 | -1.04841 | 0.36212623 | 0.9966328   | 1 | 1669 |
| REACTOME_RIP_MEDIATED_NFKB_ACTIVATION_VIA_DAI                                                                                   | 18  | -0.45895 | -1.04743 | 0.39240506 | 0.9923055   | 1 | 647  |
| REACTOME_SHC_RELATED_EVENTS                                                                                                     | 16  | -0.47886 | -1.04598 | 0.39485982 | 0.9897641   | 1 | 3546 |
| BIOCARTA_TGFB_PATHWAY                                                                                                           | 19  | -0.45855 | -1.04554 | 0.430622   | 0.9835973   | 1 | 162  |
| KEGG_MATURITY_ONSET_DIABETES_OF_THE_YOUNG                                                                                       | 16  | -0.48511 | -1.04209 | 0.4097222  | 0.98877114  | 1 | 12   |
| REACTOME_SIGNALING_BY_FGFR_MUTANTS                                                                                              | 37  | -0.39738 | -1.04067 | 0.39083558 | 0.986348    | 1 | 233  |
| BIOCARTA_PGC1A_PATHWAY                                                                                                          | 22  | -0.44047 | -1.04046 | 0.4241706  | 0.97935855  | 1 | 5405 |
| REACTOME_ABCA_TRANSPORTERS_IN_LIPID_HOMEOSTASIS                                                                                 | 15  | -0.4686  | -1.03808 | 0.41025642 | 0.9803864   | 1 | 5450 |
| REACTOME_GABA_RECEPTOR_ACTIVATION                                                                                               | 42  | -0.38625 | -1.03646 | 0.36507937 | 0.97875273  | 1 | 808  |
| KEGG_SPHINGOLIPID_METABOLISM                                                                                                    | 33  | -0.40901 | -1.03282 | 0.416      | 0.9846134   | 1 | 3988 |
| REACTOME_TCR_SIGNALING                                                                                                          | 41  | -0.38532 | -1.03259 | 0.38659793 | 0.97808063  | 1 | 5385 |
| REACTOME_SMAD2_SMAD3_SMAD4_HETEROTRIMER_REGULATES_TRANSCRIPTION                                                                 | 26  | -0.41685 | -1.02823 | 0.40048543 | 0.98703104  | 1 | 2949 |
| REACTOME_METABOLISM_OF_AMINO_ACIDS_AND_DERIVATIVES                                                                              | 181 | -0.30475 | -1.02579 | 0.39694658 | 0.9886298   | 1 | 3281 |
| KEGG_NATURAL_KILLER_CELL_MEDIATED_CYTOTOXICITY                                                                                  | 95  | -0.33036 | -1.02325 | 0.38291138 | 0.9908038   | 1 | 3833 |
| REACTOME_RNA_POL_III_TRANSCRIPTION_TERMINATION                                                                                  | 19  | -0.44031 | -1.02299 | 0.43601894 | 0.9845582   | 1 | 518  |
| BIOCARTA_AT1R_PATHWAY                                                                                                           | 31  | -0.39812 | -1.02215 | 0.40759495 | 0.98054165  | 1 | 5394 |
| REACTOME_NETRIN1_SIGNALING                                                                                                      | 34  | -0.39174 | -1.02079 | 0.42964825 | 0.97848386  | 1 | 2377 |
| BIOCARTA_IL6_PATHWAY                                                                                                            | 22  | -0.42996 | -1.01575 | 0.41411763 | 0.9892666   | 1 | 6108 |
| BIOCARTA_IL12_PATHWAY                                                                                                           | 16  | -0.46013 | -1.01412 | 0.45971563 | 0.98792946  | 1 | 5394 |
| REACTOME_NOD1_2_SIGNALING_PATHWAY                                                                                               | 29  | -0.41275 | -1.01405 | 0.44533333 | 0.9811635   | 1 | 4870 |
| REACTOME_SIGNALING_BY_SCF_KIT                                                                                                   | 74  | -0.34595 | -1.01383 | 0.4034091  | 0.97501534  | 1 | 5034 |
| BIOCARTA_EPO_PATHWAY                                                                                                            | 19  | -0.44963 | -1.01359 | 0.44923857 | 0.9689287   | 1 | 5394 |
| REACTOME_G_ALPHA_Q_SIGNALING_EVENTS                                                                                             | 134 | -0.31789 | -1.01334 | 0.41744548 | 0.9630945   | 1 | 3777 |
| KEGG_GLYCOSYLPHOSPHATIDYLINOSITOL_GPI_ANCHOR_BIOSYNTHESIS                                                                       | 24  | -0.4216  | -1.01321 | 0.4390244  | 0.95691824  | 1 | 2960 |
| REACTOME_EFFECTS_OF_PIP2_HYDROLYSIS                                                                                             | 21  | -0.43413 | -1.01264 | 0.44868734 | 0.9525308   | 1 | 2480 |
| KEGG_GLYCOSAMINOGLYCAN_BIOSYNTHESIS_HEPARAN_SULFATE                                                                             | 24  | -0.42255 | -1.01215 | 0.44604316 | 0.94787043  | 1 | 4288 |
| KEGG_THYROID_CANCER                                                                                                             | 29  | -0.40631 | -1.00895 | 0.45       | 0.9526414   | 1 | 2923 |
| REACTOME_INTEGRIN_ALPHAIIIB_BETA3_SIGNALING                                                                                     | 27  | -0.40506 | -1.00667 | 0.42892158 | 0.9538928   | 1 | 1545 |
| REACTOME_TRIGLYCERIDE_BIOSYNTHESIS                                                                                              | 36  | -0.38336 | -1.00466 | 0.4781491  | 0.9546423   | 1 | 4806 |
| REACTOME_GPCR_LIGAND_BINDING                                                                                                    | 252 | -0.2878  | -1.0005  | 0.42156863 | 0.96210396  | 1 | 1949 |
| REACTOME_TRANSPORT_OF_INORGANIC_CATIONS_ANIONS_AND_AMINO_ACIDS_OLIGOPEPTIDES                                                    | 80  | -0.33639 | -1.00046 | 0.44508672 | 0.9559562   | 1 | 1078 |
| REACTOME_POST_TRANSLATIONAL_PROTEIN_MODIFICATION                                                                                | 168 | -0.29941 | -0.99947 | 0.39922482 | 0.9528854   | 1 | 3077 |
| KEGG_BASAL_CELL_CARCINOMA                                                                                                       | 51  | -0.35938 | -0.99389 | 0.46835443 | 0.9659308   | 1 | 1926 |
| KEGG_NICOTINATE_AND_NICOTINAMIDE_METABOLISM                                                                                     | 21  | -0.40885 | -0.99311 | 0.4608076  | 0.9623119   | 1 | 2703 |
| REACTOME_SIGNALING_BY_FGFR1_MUTANTS                                                                                             | 25  | -0.40768 | -0.99069 | 0.44963145 | 0.96421856  | 1 | 2979 |
| KEGG_LEISHMANIA_INFECTION                                                                                                       | 51  | -0.35281 | -0.99047 | 0.44031832 | 0.95892656  | 1 | 374  |
| REACTOME_REGULATION_OF_GLUKOKINASE_BY_GLUKOKINASE_REGULATORY_PROTEIN                                                            | 26  | -0.39971 | -0.9877  | 0.46601942 | 0.96208173  | 1 | 4175 |
| REACTOME_DARPP_32_EVENTS                                                                                                        | 23  | -0.41147 | -0.98363 | 0.47016707 | 0.9696435   | 1 | 1689 |
| REACTOME_PI3K_CASCADE                                                                                                           | 61  | -0.34048 | -0.9751  | 0.52       | 0.9922334   | 1 | 233  |
| REACTOME_MAP_KINASE_ACTIVATION_IN_TLR_CASCADE                                                                                   | 49  | -0.35355 | -0.9724  | 0.4847561  | 0.99528515  | 1 | 5394 |
| REACTOME_TRANSCRIPTIONAL_ACTIVITY_OF_SMAD2_SMAD3_SMAD4_HETEROTRIMER                                                             | 37  | -0.37037 | -0.97216 | 0.51005024 | 0.99006045  | 1 | 2949 |
| REACTOME_CYTOKINE_SIGNALING_IN_IMMUNE_SYSTEM                                                                                    | 230 | -0.28018 | -0.97213 | 0.52100843 | 0.9841234   | 1 | 3843 |
| REACTOME_SPHINGOLIPID_DE_NOVO_BIOSYNTHESIS                                                                                      | 26  | -0.3982  | -0.9718  | 0.48566118 | 0.9792237   | 1 | 4762 |
| REACTOME_PHASE1_FUNCTIONALIZATION_OF_COMPOUNDS                                                                                  | 53  | -0.34488 | -0.96964 | 0.4903581  | 0.9810306   | 1 | 2946 |
| KEGG_GLYCOSAMINOGLYCAN_BIOSYNTHESIS_CHONDROITIN_SULFATE                                                                         | 22  | -0.40909 | -0.96922 | 0.49427918 | 0.976411    | 1 | 3911 |
| BIOCARTA_SHH_PATHWAY                                                                                                            | 15  | -0.4326  | -0.96512 | 0.49311927 | 0.98433006  | 1 | 1926 |
| BIOCARTA_CSK_PATHWAY                                                                                                            | 18  | -0.41884 | -0.96411 | 0.48994976 | 0.98117641  | 1 | 5811 |
| REACTOME_AMINO_ACID_SYNTHESIS_AND_INTERCONVERSION_TRANAMINATION                                                                 | 15  | -0.44176 | -0.95794 | 0.51746726 | 0.99680334  | 1 | 3026 |
| KEGG_REGULATION_OF_AUTOPHAGY                                                                                                    | 20  | -0.40775 | -0.95616 | 0.5122549  | 0.9969625   | 1 | 3537 |
| REACTOME_PRE_NOTCH_EXPRESSION_AND_PROCESSING                                                                                    | 38  | -0.36273 | -0.95565 | 0.51344085 | 0.9929596   | 1 | 5562 |
| KEGG_INSULIN_SIGNALING_PATHWAY                                                                                                  | 128 | -0.29887 | -0.95377 | 0.5628931  | 0.99384964  | 1 | 4134 |
| BIOCARTA_ATM_PATHWAY                                                                                                            | 19  | -0.41873 | -0.95225 | 0.49408984 | 0.9931128   | 1 | 6299 |
| BIOCARTA_NFAT_PATHWAY                                                                                                           | 48  | -0.34847 | -0.95101 | 0.55376345 | 0.9914395   | 1 | 1689 |
| REACTOME_SIGNALING_BY_RHO_GTPASES                                                                                               | 108 | -0.30396 | -0.9492  | 0.5765472  | 0.9914564   | 1 | 4100 |
| KEGG_DORSO_VENTRAL_AXIS_FORMATION                                                                                               | 23  | -0.40375 | -0.94809 | 0.52102804 | 0.989946506 | 1 | 1245 |
| KEGG_ARRHYTHMOGENIC_RIGHT_VENTRICULAR_CARDIOMYOPATHY_ARVC                                                                       | 67  | -0.33024 | -0.94805 | 0.55588233 | 0.9839927   | 1 | 935  |
| BIOCARTA_BCR_PATHWAY                                                                                                            | 34  | -0.36103 | -0.94191 | 0.53333336 | 0.99838036  | 1 | 2779 |
| REACTOME_METABOLISM_OF_LIPIDS_AND_LIPOPROTEINS                                                                                  | 422 | -0.25658 | -0.936   | 0.75       | 1           | 1 | 3445 |
| KEGG_ENDOMETRIAL_CANCER                                                                                                         | 50  | -0.3373  | -0.93584 | 0.5380435  | 1           | 1 | 1408 |
| REACTOME_TRANSPORT_TO_THE_GOLGI_AND_SUBSEQUENT_MODIFICATION                                                                     | 32  | -0.36013 | -0.93392 | 0.5364706  | 1           | 1 | 378  |
| REACTOME_TRIF_MEDIATED_TLR3_SIGNALING                                                                                           | 73  | -0.30993 | -0.93138 | 0.5770492  | 1           | 1 | 5034 |
| BIOCARTA_WNT_PATHWAY                                                                                                            | 24  | -0.3795  | -0.91785 | 0.55504584 | 1           | 1 | 190  |
| BIOCARTA_PYK2_PATHWAY                                                                                                           | 28  | -0.36563 | -0.91643 | 0.58780485 | 1           | 1 | 5957 |
| REACTOME_NUCLEAR_EVENTS_KINASE_AND_TRANSCRIPTION_FACTOR_ACTIVATION                                                              | 24  | -0.38021 | -0.91589 | 0.56222224 | 1           | 1 | 5034 |
| KEGG_CYSSTEINE_AND_METHIONINE_METABOLISM                                                                                        | 33  | -0.35948 | -0.91459 | 0.57462686 | 1           | 1 | 1277 |
| KEGG_T_CELL_RECEPTOR_SIGNALING_PATHWAY                                                                                          | 95  | -0.29628 | -0.91452 | 0.64576805 | 1           | 1 | 3425 |
| REACTOME_INSULIN_RECEPTOR_SIGNALING_CASCADE                                                                                     | 77  | -0.30828 | -0.9131  | 0.6126126  | 1           | 1 | 723  |
| REACTOME_NRAGE_SIGNALS_DEATH_THROUGH_JNK                                                                                        | 43  | -0.33946 | -0.91232 | 0.58679706 | 1           | 1 | 5920 |
| REACTOME_METABOLISM_OF_NUCLEOTIDES                                                                                              | 64  | -0.31793 | -0.91204 | 0.59375    | 1           | 1 | 1953 |
| REACTOME_SIGNALING_BY_ROBO_RECEPTOR                                                                                             | 27  | -0.37038 | -0.90807 | 0.58542717 | 1           | 1 | 5110 |
| BIOCARTA_VIP_PATHWAY                                                                                                            | 25  | -0.37879 | -0.90586 | 0.614486   | 1           | 1 | 4953 |
| REACTOME_ASSOCIATION_OF_TRIC_CCT_WITH_TARGET_PROTEINS_DURING_BIOSYNTHESIS                                                       | 26  | -0.36696 | -0.90556 | 0.6167076  | 1           | 1 | 1095 |

|                                                                                                                   |     |          |          |            |            |   |      |
|-------------------------------------------------------------------------------------------------------------------|-----|----------|----------|------------|------------|---|------|
| REACTOME_SIGNALLING_TO_ERKS                                                                                       | 35  | -0.34729 | -0.90439 | 0.6        | 1          | 1 | 3823 |
| REACTOME_ARMS_MEDIATED_ACTIVATION                                                                                 | 17  | -0.39948 | -0.89962 | 0.5970516  | 1          | 1 | 3823 |
| BIOCARTA_ERK_PATHWAY                                                                                              | 28  | -0.36533 | -0.89914 | 0.615942   | 1          | 1 | 4376 |
| KEGG_COLORECTAL_CANCER                                                                                            | 62  | -0.30849 | -0.89908 | 0.65591395 | 1          | 1 | 1408 |
| REACTOME_JNK_C_JUN_KINASES_PHOSPHORYLATION_AND_ACTIVATION_MEDIATED_BY_ACTIVATED_HU<br>MAN_TAK1                    | 16  | -0.40099 | -0.89869 | 0.57798165 | 1          | 1 | 3318 |
| REACTOME_CYTOCHROME_P450_ARRANGED_BY_SUBSTRATE_TYPE                                                               | 39  | -0.33575 | -0.89788 | 0.6393443  | 1          | 1 | 2946 |
| REACTOME_SYNTHESIS_OF_PIP3_AT_THE_GOLGI_MEMBRANE                                                                  | 16  | -0.4099  | -0.89657 | 0.6        | 1          | 1 | 5749 |
| REACTOME_GAB1_SIGNALOSOME                                                                                         | 36  | -0.33854 | -0.89513 | 0.6315789  | 1          | 1 | 5461 |
| BIOCARTA_NDKDYNAMIN_PATHWAY                                                                                       | 18  | -0.39241 | -0.89184 | 0.5788235  | 1          | 1 | 812  |
| KEGG_PANCREATIC_CANCER                                                                                            | 69  | -0.30684 | -0.89136 | 0.6571429  | 1          | 1 | 4870 |
| REACTOME_ADAPTIVE_IMMUNE_SYSTEM                                                                                   | 458 | -0.24302 | -0.88942 | 0.9440559  | 1          | 1 | 5075 |
| REACTOME_ABC_FAMILY_PROTEINS_MEDIATED_TRANSPORT                                                                   | 31  | -0.35065 | -0.88891 | 0.62857145 | 1          | 1 | 5450 |
| BIOCARTA_CDMAC_PATHWAY                                                                                            | 16  | -0.40406 | -0.88695 | 0.60807604 | 1          | 1 | 374  |
| REACTOME_ERK_MAPK_TARGETS                                                                                         | 21  | -0.38032 | -0.88567 | 0.6518847  | 1          | 1 | 4676 |
| KEGG_GLUTATHIONE_METABOLISM                                                                                       | 43  | -0.32352 | -0.88413 | 0.6666667  | 1          | 1 | 485  |
| REACTOME_G_ALPHA_I_SIGNALING_EVENTS                                                                               | 128 | -0.27591 | -0.88106 | 0.75767916 | 1          | 1 | 1949 |
| REACTOME_MAPK_TARGETS_NUCLEAR_EVENTS_MEDIATED_BY_MAP_KINASES                                                      | 30  | -0.34566 | -0.88103 | 0.6627635  | 1          | 1 | 5394 |
| REACTOME_FORMATION_OF_THE_TERNARY_COMPLEX_AND_SUBSEQUENTLY_THE_43S_COMPLEX                                        | 58  | -0.31524 | -0.88041 | 0.67639256 | 1          | 1 | 1084 |
| BIOCARTA_EGF_PATHWAY                                                                                              | 31  | -0.3464  | -0.87992 | 0.64871794 | 1          | 1 | 2813 |
| REACTOME_CARMA1_ER_PATHWAY                                                                                        | 34  | -0.34286 | -0.87976 | 0.68190475 | 1          | 1 | 2156 |
| REACTOME_RNA_POL_III_TRANSCRIPTION                                                                                | 33  | -0.34797 | -0.87559 | 0.6967419  | 1          | 1 | 938  |
| REACTOME_INTERFERON_ALPHA_BETA_SIGNALING                                                                          | 46  | -0.3221  | -0.87521 | 0.6717949  | 1          | 1 | 9073 |
| REACTOME_SIGNALING_BY_TGF_BETA_RECEPTOR_COMPLEX                                                                   | 61  | -0.30603 | -0.87468 | 0.6857143  | 1          | 1 | 4432 |
| REACTOME_ION_TRANSPORT_BY_P_TYPE_ATPASES                                                                          | 30  | -0.34774 | -0.87274 | 0.6244019  | 1          | 1 | 2670 |
| KEGG_MTOR_SIGNALING_PATHWAY                                                                                       | 49  | -0.31416 | -0.87266 | 0.6666667  | 1          | 1 | 4543 |
| REACTOME_SIGNALING_BY_INSULIN_RECEPTOR                                                                            | 97  | -0.27702 | -0.87216 | 0.77627116 | 0.99968946 | 1 | 723  |
| REACTOME_ACTIVATION_OF_THE_MRNA_UPON_BINDING_OF_THE_CAP_BINDING_COMPLEX_AND_EIF5A<br>ND_SUBSEQUENT_BINDING_TO_43S | 66  | -0.29703 | -0.8635  | 0.7318436  | 1          | 1 | 10   |
| REACTOME_PLATELET_AGGREGATION_PLUG_FORMATION                                                                      | 33  | -0.34183 | -0.86321 | 0.6466165  | 1          | 1 | 1545 |
| REACTOME_TRAF6_MEDIATED_INDUCION_OF_NFKB_AND_MAP_KINASES_UPON_TLR7_8_OR_9_ACTIVATI<br>ON                          | 73  | -0.2921  | -0.86192 | 0.71387285 | 1          | 1 | 5105 |
| REACTOME_INTERACTION_BETWEEN_L1_AND_ANKYRINS                                                                      | 20  | -0.37615 | -0.85429 | 0.64568764 | 1          | 1 | 1910 |
| REACTOME_CHONDROITIN_SULFATE_DERMATAN_SULFATE_METABOLISM                                                          | 47  | -0.31503 | -0.851   | 0.69529086 | 1          | 1 | 3911 |
| BIOCARTA_NKT_PATHWAY                                                                                              | 21  | -0.35455 | -0.84152 | 0.702765   | 1          | 1 | 7183 |
| REACTOME_SIGNALING_BY_NOTCH                                                                                       | 96  | -0.27373 | -0.84135 | 0.8262195  | 1          | 1 | 2860 |
| REACTOME_ACTIVATED_TLR4_SIGNALING                                                                                 | 91  | -0.28211 | -0.84056 | 0.82729805 | 1          | 1 | 5034 |
| REACTOME_SULFUR_AMINO_ACID_METABOLISM                                                                             | 23  | -0.35543 | -0.83682 | 0.692494   | 1          | 1 | 1527 |
| REACTOME_TOLL_RECEPTOR_CASCADES                                                                                   | 108 | -0.26752 | -0.83583 | 0.85119045 | 1          | 1 | 5105 |
| KEGG_CHRONIC_MYELOID_LEUKEMIA                                                                                     | 73  | -0.28447 | -0.83284 | 0.78571427 | 1          | 1 | 4198 |
| REACTOME_G_ALPHA_Z_SIGNALING_EVENTS                                                                               | 42  | -0.30621 | -0.83002 | 0.7350649  | 1          | 1 | 3769 |
| KEGG_OOCYTE_MEIOSIS                                                                                               | 102 | -0.26411 | -0.82904 | 0.85755813 | 1          | 1 | 2174 |
| REACTOME_PLATELET_SENSITIZATION_BY_LDL                                                                            | 16  | -0.36631 | -0.82527 | 0.70159453 | 1          | 1 | 2129 |
| KEGG_ARGININE_AND_PROLINE_METABOLISM                                                                              | 48  | -0.29806 | -0.82358 | 0.78370786 | 1          | 1 | 3519 |
| REACTOME_CHONDROITIN_SULFATE_BIOSYNTHESIS                                                                         | 19  | -0.35666 | -0.82318 | 0.74125874 | 1          | 1 | 4710 |
| KEGG_LINOLEIC_ACID_METABOLISM                                                                                     | 20  | -0.3465  | -0.82202 | 0.6944444  | 1          | 1 | 520  |
| KEGG_RIBOFLAVIN_METABOLISM                                                                                        | 15  | -0.37095 | -0.82124 | 0.6723716  | 1          | 1 | 7594 |
| REACTOME_SIGNALING_BY_PDGF                                                                                        | 114 | -0.25992 | -0.82092 | 0.89320385 | 1          | 1 | 5034 |
| REACTOME_PROLONGED_ERK_ACTIVATION_EVENTS                                                                          | 19  | -0.35006 | -0.81445 | 0.71566266 | 1          | 1 | 3823 |
| BIOCARTA_MAPK_PATHWAY                                                                                             | 86  | -0.26426 | -0.81277 | 0.8628049  | 1          | 1 | 5034 |
| KEGG_OTHER_GLYCAN_DEGRADATION                                                                                     | 15  | -0.37517 | -0.8127  | 0.7024608  | 1          | 1 | 5304 |
| REACTOME_BMAL1_CLOCK_NPAS2_ACTIVATES_CIRCADIAN_EXPRESSION                                                         | 32  | -0.32016 | -0.81153 | 0.79       | 1          | 1 | 4297 |
| KEGG_VIBRIO_CHOLERAE_INFECTION                                                                                    | 51  | -0.29173 | -0.81041 | 0.8161209  | 1          | 1 | 2080 |
| REACTOME_REGULATION_OF_KIT_SIGNALING                                                                              | 16  | -0.36385 | -0.80992 | 0.7334852  | 1          | 1 | 1104 |
| REACTOME_CLASS_I_MHC_MEDIATED_ANTIGEN_PROCESSING_PRESENTATION                                                     | 220 | -0.23357 | -0.80947 | 0.9823009  | 1          | 1 | 4109 |
| REACTOME_DOWNSTREAM_SIGNAL_TRANSDUCTION                                                                           | 88  | -0.26681 | -0.8031  | 0.87261146 | 1          | 1 | 5034 |
| KEGG_TRYPTOPHAN_METABOLISM                                                                                        | 37  | -0.30639 | -0.80124 | 0.786385   | 1          | 1 | 5006 |
| REACTOME_PROCESSIVE_SYNTHESIS_ON_THE_LAGGING_STRAND                                                               | 15  | -0.35583 | -0.80059 | 0.7414188  | 1          | 1 | 3467 |
| KEGG_GLYCEROLIPID_METABOLISM                                                                                      | 37  | -0.30099 | -0.79991 | 0.8025641  | 1          | 1 | 3714 |
| REACTOME_IL_2_SIGNALING                                                                                           | 37  | -0.30467 | -0.79455 | 0.80548626 | 1          | 1 | 3622 |
| REACTOME_MITOCHONDRIAL_TRNA_AMINOACYLATION                                                                        | 21  | -0.33956 | -0.79434 | 0.7651163  | 1          | 1 | 7329 |
| REACTOME_SIGNALING_BY_EGFR_IN_CANCER                                                                              | 103 | -0.25296 | -0.79148 | 0.9297125  | 1          | 1 | 5034 |
| REACTOME_DOWNSTREAM_TCR_SIGNALING                                                                                 | 25  | -0.32258 | -0.78891 | 0.7570755  | 1          | 1 | 5385 |
| REACTOME_PI3K_AKT_ACTIVATION                                                                                      | 36  | -0.30825 | -0.78808 | 0.80100757 | 1          | 1 | 5461 |
| KEGG_PYRUVATE_METABOLISM                                                                                          | 36  | -0.30706 | -0.78766 | 0.8230769  | 1          | 1 | 5006 |
| BIOCARTA_KERATINOCYTE_PATHWAY                                                                                     | 45  | -0.29103 | -0.78757 | 0.83715016 | 1          | 1 | 5961 |
| REACTOME_INTERFERON_SIGNALING                                                                                     | 129 | -0.24288 | -0.7861  | 0.94055945 | 1          | 1 | 5451 |
| REACTOME_INTERFERON_GAMMA_SIGNALING                                                                               | 46  | -0.28457 | -0.78583 | 0.8314917  | 1          | 1 | 6107 |
| REACTOME_TRANSPORT_OF_RIBONUCLEOPROTEINS_INTO_THE_HOST_NUCLEUS                                                    | 26  | -0.32581 | -0.78332 | 0.76960784 | 1          | 1 | 4626 |
| REACTOME_FATTY_ACYL_COA_BIOSYNTHESIS                                                                              | 18  | -0.34914 | -0.78163 | 0.74647886 | 1          | 1 | 4806 |
| KEGG_PRIMARY_IMMUNODEFICIENCY                                                                                     | 29  | -0.30775 | -0.77593 | 0.80100757 | 1          | 1 | 6756 |
| REACTOME_HOMOLOGOUS_RECOMBINATION_REPAIR_OF_REPLICATION_INDEPENDENT_DOUBLE_STRAN<br>D_BREAKS                      | 15  | -0.35425 | -0.77278 | 0.7529412  | 1          | 1 | 6774 |
| REACTOME_RESPONSE_TO_ELEVATED_PLATELET_CYTOSOLIC_CA2                                                              | 75  | -0.25835 | -0.76891 | 0.91354465 | 1          | 1 | 5343 |
| REACTOME_INTERACTIONS_OF_VPR_WITH_HOST_CELLULAR_PROTEINS                                                          | 31  | -0.30054 | -0.76809 | 0.8230769  | 1          | 1 | 6114 |
| REACTOME_DOWNREGULATION_OF_SMAD2_3_SMAD4_TRANSCRIPTIONAL_ACTIVITY                                                 | 20  | -0.3326  | -0.76527 | 0.7975     | 1          | 1 | 2484 |
| BIOCARTA_DEATH_PATHWAY                                                                                            | 33  | -0.29956 | -0.76417 | 0.80987656 | 1          | 1 | 677  |
| REACTOME_PRE_NOTCH_TRANSCRIPTION_AND_TRANSLATION                                                                  | 23  | -0.31524 | -0.76246 | 0.7943925  | 1          | 1 | 5562 |
| BIOCARTA_CALCINEURIN_PATHWAY                                                                                      | 18  | -0.34525 | -0.76199 | 0.7708831  | 1          | 1 | 3715 |
| REACTOME_SIGNALING_BY_THE_B_CELL_RECEPTOR_BCR                                                                     | 121 | -0.23761 | -0.76117 | 0.97077924 | 1          | 1 | 5461 |
| KEGG_NEUROTROPHIN_SIGNALING_PATHWAY                                                                               | 124 | -0.23524 | -0.75659 | 0.9685315  | 1          | 1 | 5405 |
| REACTOME_CELL_DEATH_SIGNALING_VIA_NFkB_IRF1_AND_NADE                                                              | 58  | -0.2644  | -0.7564  | 0.9017341  | 1          | 1 | 3823 |
| BIOCARTA_ETS_PATHWAY                                                                                              | 18  | -0.33422 | -0.7498  | 0.82678986 | 1          | 1 | 5964 |
| REACTOME_PHOSPHORYLATION_OF_THE_APC_C                                                                             | 17  | -0.33041 | -0.74948 | 0.79586565 | 1          | 1 | 3936 |
| REACTOME_BRANCHED_CHAIN_AMINO_ACID_CATABOLISM                                                                     | 17  | -0.33051 | -0.74918 | 0.8252427  | 1          | 1 | 1481 |
| REACTOME_GLUCOSE_TRANSPORT                                                                                        | 33  | -0.28789 | -0.74814 | 0.89637303 | 1          | 1 | 4175 |
| REACTOME_ANTIGEN_PROCESSING_UBIQUITINATION_PROTEASOME_DEGRADATION                                                 | 189 | -0.21976 | -0.74806 | 0.9920949  | 1          | 1 | 2977 |
| REACTOME_TRANSPORT_OF_VITAMINS_NUCLEOSIDES_AND_RELATED_MOLECULES                                                  | 29  | -0.30017 | -0.74654 | 0.8440594  | 1          | 1 | 2295 |
| REACTOME_DOUBLE_STRAND_BREAK_REPAIR                                                                               | 21  | -0.3276  | -0.74494 | 0.7849224  | 1          | 1 | 6774 |
| KEGG_NUCLEOTIDE_EXCISION_REPAIR                                                                                   | 44  | -0.27268 | -0.74458 | 0.8680739  | 1          | 1 | 6499 |
| REACTOME_TRAF6_MEDIATED_IRF1_ACTIVATION                                                                           | 19  | -0.32744 | -0.73987 | 0.795045   | 1          | 1 | 8696 |
| BIOCARTA_CHEMICAL_PATHWAY                                                                                         | 22  | -0.32053 | -0.73927 | 0.8202765  | 1          | 1 | 4395 |
| REACTOME_CIRCADIAN_CLOCK                                                                                          | 49  | -0.26779 | -0.73866 | 0.8981723  | 1          | 1 | 4428 |
| BIOCARTA_G2_PATHWAY                                                                                               | 24  | -0.30449 | -0.7303  | 0.8633257  | 1          | 1 | 6980 |
| REACTOME_EXTENSION_OF_TELOMERES                                                                                   | 27  | -0.29517 | -0.73003 | 0.84782606 | 1          | 1 | 3467 |
| BIOCARTA_HIF_PATHWAY                                                                                              | 15  | -0.32845 | -0.72503 | 0.8315098  | 1          | 1 | 6303 |
| REACTOME_FATTY_ACID_TRIACYLGLYCEROL_AND_KETONE_BODY_METABOLISM                                                    | 160 | -0.21672 | -0.72134 | 0.99622643 | 1          | 1 | 3845 |
| BIOCARTA_MYOSIN_PATHWAY                                                                                           | 30  | -0.28501 | -0.72128 | 0.8912037  | 1          | 1 | 1126 |
| KEGG_AMYOTROPHIC_LATERAL_SCLEROSIS_ALS                                                                            | 51  | -0.2585  | -0.71529 | 0.92268044 | 1          | 1 | 4676 |
| REACTOME_YAP1_AND_WWTR1_TAZ_STIMULATED_GENE_EXPRESSION                                                            | 22  | -0.30523 | -0.71408 | 0.875      | 1          | 1 | 4621 |
| BIOCARTA_PTDINS_PATHWAY                                                                                           | 23  | -0.29339 | -0.71269 | 0.89638555 | 1          | 1 | 2049 |



|                                                                                      |    |          |          |            |            |   |      |
|--------------------------------------------------------------------------------------|----|----------|----------|------------|------------|---|------|
| REACTOME_SYNTHESIS_OF_GLYCOSYLPHOSPHATIDYLINOSITOL_GPI                               | 17 | -0.31683 | -0.7114  | 0.8538283  | 1          | 1 | 7712 |
| REACTOME_DESTABILIZATION_OF_MRNA_BY_KSRP                                             | 17 | -0.31788 | -0.71009 | 0.8294931  | 1          | 1 | 4676 |
| KEGG_NITROGEN_METABOLISM                                                             | 18 | -0.3065  | -0.70693 | 0.8413793  | 1          | 1 | 1646 |
| REACTOME_NEP_NS2_INTERACTS_WITH_THE_CELLULAR_EXPORT_MACHINERY                        | 26 | -0.28525 | -0.70485 | 0.8829517  | 1          | 1 | 4175 |
| KEGG_HISTIDINE_METABOLISM                                                            | 26 | -0.28976 | -0.70409 | 0.9253012  | 1          | 1 | 5006 |
| REACTOME_DOWNREGULATION_OF_TGF_BETA_RECEPTOR_SIGNALING                               | 22 | -0.30076 | -0.69762 | 0.8628429  | 1          | 1 | 162  |
| REACTOME_REGULATION_OF_INSULIN_SECRETION_BY_GLUCAGON_LIKE_PEPTIDE1                   | 37 | -0.26501 | -0.69403 | 0.91161615 | 1          | 1 | 2514 |
| REACTOME_RIG_I_MDA5_MEDIATED_INDUCION_OF_IFN_ALPHA_BETA_PATHWAYS                     | 61 | -0.23847 | -0.69007 | 0.9833795  | 1          | 1 | 5414 |
| KEGG_P53_SIGNALING_PATHWAY                                                           | 65 | -0.23988 | -0.68973 | 0.9769452  | 1          | 1 | 4571 |
| REACTOME_CONVERSION_FROM_APC_C_CDC20_TO_APC_C_CDH1_IN_LATE_ANAPHASE                  | 16 | -0.30359 | -0.68733 | 0.8591224  | 1          | 1 | 3936 |
| REACTOME_TGF_BETA_RECEPTOR_SIGNALING_ACTIVATES_SMADS                                 | 25 | -0.2883  | -0.6871  | 0.8973747  | 0.99728656 | 1 | 162  |
| KEGG_GLYCOLYSIS_GLUconeogenesis                                                      | 52 | -0.24121 | -0.67471 | 0.97493035 | 1          | 1 | 2173 |
| KEGG_SELENOAMINO_ACID_METABOLISM                                                     | 25 | -0.27707 | -0.67118 | 0.9123223  | 1          | 1 | 4971 |
| BIOCARTA_ATRBRCA_PATHWAY                                                             | 20 | -0.2893  | -0.67043 | 0.8905908  | 1          | 1 | 4320 |
| KEGG_AMINO_SUGAR_AND_NUCLEOTIDE_SUGAR_METABOLISM                                     | 41 | -0.24886 | -0.66913 | 0.9678284  | 0.99861455 | 1 | 4739 |
| KEGG_NOTCH_SIGNALING_PATHWAY                                                         | 45 | -0.24723 | -0.66434 | 0.9680851  | 0.998819   | 1 | 4782 |
| BIOCARTA_STRESS_PATHWAY                                                              | 25 | -0.27321 | -0.66347 | 0.94089836 | 0.9962066  | 1 | 5394 |
| REACTOME_ANTIVIRAL_MECHANISM_BY_IFN_STIMULATED_GENES                                 | 65 | -0.22592 | -0.66099 | 0.982906   | 0.9947969  | 1 | 4626 |
| KEGG_PHENYLALANINE_METABOLISM                                                        | 17 | -0.28562 | -0.64004 | 0.9022727  | 1          | 1 | 6019 |
| REACTOME_INHIBITION_OF_THE_PROTEOLYTIC_ACTIVITY_OF_APC_C_REQUIRED_FOR_THE_ONSET_OF_A | 18 | -0.28349 | -0.63916 | 0.9375     | 1          | 1 | 5568 |
| NAPHASE_BY_MITOTIC_SPINDLE_CHECKPOINT_COMPONENTS                                     | 17 | -0.27737 | -0.63632 | 0.9236111  | 1          | 1 | 4676 |
| REACTOME_ACTIVATED_TAK1_MEDIATES_P38_MAPK_ACTIVATION                                 | 19 | -0.2727  | -0.63083 | 0.91484183 | 0.9997657  | 1 | 3467 |
| REACTOME_LAGGING_STRAND_SYNTHESIS                                                    | 57 | -0.21901 | -0.61826 | 0.9945355  | 1          | 1 | 4953 |
| BIOCARTA_HIVNEF_PATHWAY                                                              | 22 | -0.261   | -0.61313 | 0.9291139  | 1          | 1 | 4428 |
| REACTOME_CIRCADIAN_REPRESSION_OF_EXPRESSION_BY_REV_ERBA                              | 20 | -0.24995 | -0.59132 | 0.95486933 | 1          | 1 | 6499 |
| REACTOME_RNA_POL_I_TRANSCRIPTION_TERMINATION                                         | 31 | -0.23107 | -0.58688 | 0.98288506 | 1          | 1 | 4175 |
| REACTOME_TRANSPORT_OF_MATURE_MRNA_DERIVED_FROM_AN_INTRONLESS_TRANSCRIPT              | 23 | -0.24234 | -0.57592 | 0.97932816 | 1          | 1 | 3778 |
| REACTOME_RORA_ACTIVATES_CIRCADIAN_EXPRESSION                                         | 24 | -0.23945 | -0.56971 | 0.9683377  | 1          | 1 | 7540 |
| KEGG_VALINE_LEUCINE_AND_ISOLEUCINE_DEGRADATION                                       | 44 | -0.20788 | -0.55669 | 0.9839142  | 1          | 1 | 5318 |
| KEGG_N_GLYCAN_BIOSYNTHESIS                                                           | 46 | -0.19773 | -0.54484 | 0.9948052  | 1          | 1 | 7592 |
| BIOCARTA_TNFR1_PATHWAY                                                               | 29 | -0.21167 | -0.54224 | 0.9832134  | 1          | 1 | 5394 |
| KEGG_MISMATCH_REPAIR                                                                 | 23 | -0.21676 | -0.51991 | 0.99012345 | 1          | 1 | 5634 |
| BIOCARTA_CERAMIDE_PATHWAY                                                            | 22 | -0.19858 | -0.47425 | 0.99766356 | 1          | 1 | 4953 |
| REACTOME_ENOS_ACTIVATION_AND_REGULATION                                              | 20 | -0.20465 | -0.4731  | 0.9928058  | 0.9995718  | 1 | 5892 |
| REACTOME_METABOLISM_OF_NON_CODING_RNA                                                | 47 | -0.15849 | -0.43849 | 1          | 0.9984103  | 1 | 4801 |

















|                                                                                                                    |     |          |          |            |            |   |      |
|--------------------------------------------------------------------------------------------------------------------|-----|----------|----------|------------|------------|---|------|
| REACTOME_FACTORS_INVOLVED_IN_MEGAKARYOCYTE_DEVELOPMENT_AND_PLATELET_PRODUCTION                                     | 112 | -0.25412 | -0.85658 | 0.7708738  | 0.94791764 | 1 | 5674 |
| KEGG_APOPTOSIS                                                                                                     | 82  | -0.26318 | -0.85528 | 0.7218814  | 0.9464275  | 1 | 5747 |
| REACTOME_GENERIC_TRANSCRIPTION_PATHWAY                                                                             | 325 | -0.22455 | -0.85527 | 0.8950495  | 0.9420661  | 1 | 6272 |
| REACTOME_GLYCOGEN_BREAKDOWN_GLYCOGENOLYSIS                                                                         | 17  | -0.36086 | -0.85347 | 0.6496063  | 0.94201744 | 1 | 3363 |
| KEGG_TASTE_TRANSDUCTION                                                                                            | 35  | -0.31112 | -0.85327 | 0.66927594 | 0.9382261  | 1 | 6435 |
| KEGG_RIBOFLAVIN_METABOLISM                                                                                         | 15  | -0.36268 | -0.85295 | 0.6461825  | 0.9364226  | 1 | 2907 |
| REACTOME_PHOSPHOLIPID_METABOLISM                                                                                   | 177 | -0.23716 | -0.84951 | 0.8241966  | 0.93847656 | 1 | 4420 |
| REACTOME_RESOLUTION_OF_AP_SITES_VIA_THE_MULTIPLE_NUCLEOTIDE_PATCH_REPLACEMENT_PATCHWAY                             | 17  | -0.35263 | -0.84945 | 0.6420233  | 0.9343616  | 1 | 7366 |
| REACTOME_RNA_POL_III_TRANSCRIPTION                                                                                 | 33  | -0.3046  | -0.84919 | 0.71009177 | 0.9306715  | 1 | 9379 |
| KEGG_BUTANOATE_METABOLISM                                                                                          | 29  | -0.3198  | -0.84247 | 0.6673077  | 0.9416033  | 1 | 4810 |
| BIOCARTA_IGF1MOTOR_PATHWAY                                                                                         | 20  | -0.33935 | -0.83758 | 0.68473893 | 0.94836736 | 1 | 4009 |
| REACTOME_SYNTHESIS_OF_GLYCOSYLPHOSPHATIDYLINOSITOL_GPI                                                             | 17  | -0.35409 | -0.83626 | 0.6952191  | 0.9470011  | 1 | 4943 |
| REACTOME_METABOLISM_OF_PROTEINS                                                                                    | 437 | -0.21484 | -0.83555 | 0.95229006 | 0.94445914 | 1 | 5540 |
| REACTOME_APC_C_CDC20_MEDIATED_DEGRADATION_OF_MITOTIC_PROTEINS                                                      | 65  | -0.26891 | -0.83404 | 0.751503   | 0.9437442  | 1 | 5321 |
| REACTOME_G_BETA_GAMMA_SIGNALING_THROUGH_PL_C_BETA                                                                  | 19  | -0.34351 | -0.82924 | 0.69719625 | 0.9499042  | 1 | 4359 |
| REACTOME_P53_INDEPENDENT_G1_S_DNA_DAMAGE_CHECKPOINT                                                                | 48  | -0.27931 | -0.82337 | 0.7713718  | 0.9582862  | 1 | 5321 |
| REACTOME_ASSEMBLY_OF_THE_PRE_REPLICATIVE_COMPLEX                                                                   | 63  | -0.26889 | -0.82255 | 0.7943396  | 0.9558644  | 1 | 5783 |
| KEGG_PHOSPHATIDYLINOSITOL_SIGNALING_SYSTEM                                                                         | 75  | -0.26277 | -0.82141 | 0.78557116 | 0.9540864  | 1 | 3294 |
| REACTOME_PROSTACYCLIN_SIGNALING_THROUGH_PROSTACYCLIN_RECEPTOR                                                      | 18  | -0.33655 | -0.82139 | 0.71       | 0.9499842  | 1 | 4359 |
| KEGG_SMALL_CELL_LUNG_CANCER                                                                                        | 84  | -0.25914 | -0.82027 | 0.8004115  | 0.94816387 | 1 | 4009 |
| BIOCARTA_ATM_PATHWAY                                                                                               | 19  | -0.33641 | -0.81114 | 0.7061144  | 0.9628532  | 1 | 5214 |
| KEGG_PROSTATE_CANCER                                                                                               | 86  | -0.24925 | -0.8058  | 0.86564296 | 0.9691689  | 1 | 4009 |
| REACTOME_ARMS_MEDIATED_ACTIVATION                                                                                  | 17  | -0.33721 | -0.80424 | 0.71929824 | 0.96821976 | 1 | 1177 |
| REACTOME_THROMBIN_SIGNALING_THROUGH_PROTEINASE_ACTIVATED_RECEPTORS_PARS                                            | 31  | -0.29753 | -0.80186 | 0.7740668  | 0.9687531  | 1 | 4643 |
| REACTOME_RNA_POL_III_TRANSCRIPTION_INITIATION_FROM_TYPE_3_PROMOTER                                                 | 26  | -0.29963 | -0.79334 | 0.748538   | 0.9808601  | 1 | 6451 |
| KEGG_BIOSYNTHESIS_OF_UNSATURATED_FATTY_ACIDS                                                                       | 20  | -0.31823 | -0.79329 | 0.75435203 | 0.9768265  | 1 | 2176 |
| REACTOME_DEGRADATION_OF_THE_EXTRACELLULAR_MATRIX                                                                   | 26  | -0.30759 | -0.79301 | 0.7810651  | 0.9732097  | 1 | 2390 |
| REACTOME_RNA_POL_I_PROMOTER_OPENING                                                                                | 55  | -0.26379 | -0.79205 | 0.81431335 | 0.970916   | 1 | 7958 |
| REACTOME_DESTABILIZATION_OF_MRNA_BY_KSRP                                                                           | 17  | -0.33299 | -0.791   | 0.7348178  | 0.96888906 | 1 | 2296 |
| REACTOME_MRNA_SPLICING_MINOR_PATHWAY                                                                               | 40  | -0.27535 | -0.78904 | 0.82778865 | 0.9684718  | 1 | 3619 |
| REACTOME_PROTEOLYTIC_CLEAVAGE_OF_SNARE_COMPLEX_PROTEINS                                                            | 16  | -0.32716 | -0.78227 | 0.76982594 | 0.97639394 | 1 | 2737 |
| REACTOME_TRANSPORT_OF_VITAMINS_NUCLEOSIDES_AND_RELATED_MOLECULES                                                   | 30  | -0.2915  | -0.78178 | 0.77757007 | 0.97322243 | 1 | 5551 |
| REACTOME_PACKAGING_OF_TELOMERE_ENDS                                                                                | 43  | -0.27077 | -0.77546 | 0.822736   | 0.98003745 | 1 | 7958 |
| REACTOME_PROLONGED_ERK_ACTIVATION_EVENTS                                                                           | 19  | -0.3169  | -0.77454 | 0.77238804 | 0.97762376 | 1 | 1177 |
| REACTOME_FORMATION_OF_RNA_POL_II_ELONGATION_COMPLEX                                                                | 36  | -0.27322 | -0.75724 | 0.8246628  | 1          | 1 | 4411 |
| REACTOME_ADP_SIGNALING_THROUGH_P2RY12                                                                              | 20  | -0.30588 | -0.75612 | 0.8062016  | 0.99857086 | 1 | 4359 |
| REACTOME_THROMBOXANE_SIGNALING_THROUGH_TP_RECEPTOR                                                                 | 22  | -0.29497 | -0.74976 | 0.8233083  | 1          | 1 | 4359 |
| REACTOME_IL_RECEPTOR_SHC_SIGNALING                                                                                 | 23  | -0.29722 | -0.74619 | 0.825188   | 1          | 1 | 4009 |
| BIOCARTA_P53_PATHWAY                                                                                               | 16  | -0.32146 | -0.74428 | 0.8187023  | 1          | 1 | 1164 |
| REACTOME_ORC1_REMOVAL_FROM_CHROMATIN                                                                               | 65  | -0.23918 | -0.74381 | 0.9080675  | 1          | 1 | 5321 |
| REACTOME_INWARDLY_RECTIFYING_K_CHANNELS                                                                            | 30  | -0.27282 | -0.743   | 0.8446602  | 0.99746615 | 1 | 4750 |
| REACTOME_SYNTHESIS_OF_PIP3_AT_THE_GOLGI_MEMBRANE                                                                   | 17  | -0.31243 | -0.74191 | 0.81409    | 0.995004   | 1 | 5177 |
| REACTOME_ENDOSOMAL_SORTING_COMPLEX_REQUIRED_FOR_TRANSPORT_ESCRT                                                    | 27  | -0.28283 | -0.74147 | 0.84063745 | 0.99172986 | 1 | 467  |
| BIOCARTA_CSK_PATHWAY                                                                                               | 19  | -0.29855 | -0.74107 | 0.78515625 | 0.98837787 | 1 | 7351 |
| REACTOME_BOTULINUM_NEUROTOXICITY                                                                                   | 18  | -0.30763 | -0.73622 | 0.819802   | 0.9909563  | 1 | 2737 |
| REACTOME_OPIOID_SIGNALING                                                                                          | 71  | -0.23454 | -0.73211 | 0.93385214 | 0.99236876 | 1 | 3787 |
| REACTOME_RNA_POL_III_TRANSCRIPTION_INITIATION_FROM_TYPE_2_PROMOTER                                                 | 23  | -0.28766 | -0.73164 | 0.8241107  | 0.9891374  | 1 | 9379 |
| REACTOME_DOWNREGULATION_OF_TGF_BETA_RECEPTOR_SIGNALING                                                             | 22  | -0.28594 | -0.72511 | 0.8678862  | 0.9933764  | 1 | 992  |
| REACTOME_IRON_UPTAKE_AND_TRANSPORT                                                                                 | 35  | -0.26092 | -0.72476 | 0.8790036  | 0.9899676  | 1 | 2834 |
| REACTOME_APC_C_CDH1_MEDIATED_DEGRADATION_OF_CDC20_AND_OTHER_APC_C_CDH1_TARGET_ED_PROTEINS_IN_LATE_MITOSIS_EARLY_G1 | 64  | -0.23498 | -0.72397 | 0.9201597  | 0.98724705 | 1 | 5321 |
| REACTOME_PRE_NOTCH_TRANSCRIPTION_AND_TRANSLATION                                                                   | 23  | -0.2834  | -0.71637 | 0.8466135  | 0.99244124 | 1 | 5712 |
| REACTOME_GLUconeogenesis                                                                                           | 30  | -0.26578 | -0.71443 | 0.85626286 | 0.9907701  | 1 | 8178 |
| REACTOME_G_PROTEIN_ACTIVATION                                                                                      | 24  | -0.26902 | -0.71068 | 0.8698885  | 0.99109393 | 1 | 4359 |
| REACTOME_AUTODEGRADATION_OF_CDH1_BY_CDH1_APC_C                                                                     | 57  | -0.23698 | -0.70912 | 0.92734224 | 0.9890383  | 1 | 5321 |
| REACTOME_P53_DEPENDENT_G1_DNA_DAMAGE_RESPONSE                                                                      | 52  | -0.23725 | -0.7077  | 0.9390244  | 0.9868264  | 1 | 5321 |
| REACTOME_INHIBITION_OF_INSULIN_SECRETION_BY_ADRENALINE_NORADRENALINE                                               | 24  | -0.27689 | -0.69319 | 0.88323915 | 0.9976971  | 1 | 4359 |
| KEGG_PENTOSE_PHOSPHATE_PATHWAY                                                                                     | 24  | -0.27207 | -0.68799 | 0.8787276  | 0.99867594 | 1 | 2522 |
| REACTOME_HOST_INTERACTIONS_OF_HIV_FACTORS                                                                          | 116 | -0.20425 | -0.68796 | 0.98998    | 0.99500364 | 1 | 5321 |
| REACTOME_BILE_ACID_AND_BILE_SALT_METABOLISM                                                                        | 23  | -0.2652  | -0.68652 | 0.89366055 | 1          | 1 | 4118 |
| REACTOME_GLUcose_Metabolism                                                                                        | 62  | -0.21953 | -0.6655  | 0.9701789  | 1          | 1 | 6249 |
| REACTOME_NCAM1_INTERACTIONS                                                                                        | 36  | -0.24121 | -0.66008 | 0.9217221  | 1          | 1 | 1121 |
| REACTOME_REGULATORY_RNA_PATHWAYS                                                                                   | 21  | -0.26054 | -0.6534  | 0.90818363 | 1          | 1 | 6451 |
| REACTOME_STRIATED_MUSCLE_CONTRACTION                                                                               | 22  | -0.25804 | -0.65254 | 0.92738587 | 1          | 1 | 3491 |
| REACTOME_APOPTOTIC_EXECUTION_PHASE                                                                                 | 51  | -0.21899 | -0.65222 | 0.9526749  | 1          | 1 | 3899 |
| REACTOME_PKA_MEDIATED_PHOSPHORYLATION_OF_CREB                                                                      | 15  | -0.28293 | -0.649   | 0.925636   | 0.9994366  | 1 | 2287 |
| REACTOME_AUTODEGRADATION_OF_THE_E3_UBIQUITIN_LIGASE_COP1                                                           | 46  | -0.21974 | -0.64531 | 0.96       | 0.9981019  | 1 | 423  |
| REACTOME_GLYCOLYSIS                                                                                                | 26  | -0.24966 | -0.64092 | 0.9419729  | 0.9971357  | 1 | 5142 |
| REACTOME_PLATELET_CALCIIUM_HOMEOSTASIS                                                                             | 15  | -0.27471 | -0.64038 | 0.9158513  | 0.99388343 | 1 | 6783 |
| REACTOME_CYCLIN_E_ASSOCIATED_EVENTS_DURING_G1_S_TRANSITION                                                         | 63  | -0.20425 | -0.63596 | 0.9831461  | 0.9928616  | 1 | 5321 |
| REACTOME_MYOGEnESIS                                                                                                | 22  | -0.25107 | -0.6327  | 0.94497156 | 0.9910975  | 1 | 2785 |
| REACTOME_SYNTHESIS_AND_INTERCONVERSION_OF_NUCLEOTIDE_DI_AND_TRIPHOSPHATES                                          | 17  | -0.26377 | -0.63034 | 0.9291667  | 0.98885316 | 1 | 4967 |
| KEGG_PROXIMAL_TUBULE_BICARBONATE_RECLAMATION                                                                       | 20  | -0.24691 | -0.61606 | 0.93737376 | 0.99204016 | 1 | 3733 |
| REACTOME_CGMP_EFFECTS                                                                                              | 18  | -0.25093 | -0.6092  | 0.93907565 | 0.9914725  | 1 | 1289 |
| REACTOME_CDT1_ASSOCIATION_WITH_THE_CDC6_ORC_ORIGIN_COMPLEX                                                         | 54  | -0.20706 | -0.60814 | 0.99206346 | 0.98845905 | 1 | 5321 |
| REACTOME_NOTCH1_INTRACELLULAR_DOMAIN_REGULATES_TRANSCRIPTION                                                       | 45  | -0.18741 | -0.56148 | 0.99019605 | 0.99935603 | 1 | 4174 |
| REACTOME_NITRIC_OXIDE_STIMULATES_GUANYLATE_CYCLASE                                                                 | 22  | -0.21918 | -0.54869 | 0.9881188  | 0.9986603  | 1 | 3882 |
| BIOCARTA_SHH_PATHWAY                                                                                               | 15  | -0.23905 | -0.54429 | 0.9705882  | 0.9960576  | 1 | 5560 |
| KEGG_PROTEIN_EXPORT                                                                                                | 23  | -0.20266 | -0.51983 | 0.982659   | 0.996304   | 1 | 3673 |
| BIOCARTA_CHREBP2_PATHWAY                                                                                           | 40  | -0.17642 | -0.50042 | 0.9980732  | 0.995005   | 1 | 967  |







|                                                                                            |    |          |          |            |            |   |       |
|--------------------------------------------------------------------------------------------|----|----------|----------|------------|------------|---|-------|
| REACTOME_TRANS_GOLGI_NETWORK_VESICLE_BUDDING                                               | 57 | 0.224579 | 0.717003 | 0.9476584  | 1          | 1 | 4577  |
| REACTOME_JNK_C_JUN_KINASES_PHOSPHORYLATION_AND_ACTIVATION_MEDIATED_BY_ACTIVATED_HUMAN_TAK1 | 16 | 0.29738  | 0.715557 | 0.8639618  | 1          | 1 | 5033  |
| BIOCARTA_ACH_PATHWAY                                                                       | 15 | 0.304614 | 0.71059  | 0.85560346 | 1          | 1 | 2701  |
| KEGG_BETA_ALANINE_METABOLISM                                                               | 20 | 0.275958 | 0.708319 | 0.8824885  | 1          | 1 | 3192  |
| KEGG_BASAL_CELL_CARCINOMA                                                                  | 51 | 0.230112 | 0.707152 | 0.9435484  | 1          | 1 | 4296  |
| REACTOME_GLUCAGON_TYPE_LIGAND_RECEPTORS                                                    | 26 | 0.282805 | 0.706071 | 0.89       | 1          | 1 | 4837  |
| REACTOME_DESTABILIZATION_OF_MRNA_BY_BRF1                                                   | 17 | 0.282723 | 0.702595 | 0.8517588  | 1          | 1 | 10039 |
| REACTOME_PRE_NOTCH_TRANSCRIPTION_AND_TRANSLATION                                           | 23 | 0.266009 | 0.701646 | 0.8915663  | 1          | 1 | 1968  |
| REACTOME_SIGNALLING_TO_RAS                                                                 | 27 | 0.260808 | 0.701602 | 0.91022444 | 1          | 1 | 1771  |
| BIOCARTA_RACCYCD_PATHWAY                                                                   | 26 | 0.258186 | 0.696851 | 0.875      | 1          | 1 | 5033  |
| REACTOME_TIGHT_JUNCTION_INTERACTIONS                                                       | 28 | 0.252525 | 0.694508 | 0.91022444 | 1          | 1 | 899   |
| BIOCARTA_INTEGRIN_PATHWAY                                                                  | 38 | 0.232565 | 0.693842 | 0.9276486  | 0.9976979  | 1 | 1776  |
| REACTOME_AQUAPORIN_MEDIATED_TRANSPORT                                                      | 44 | 0.233614 | 0.693446 | 0.9661017  | 0.99492216 | 1 | 5877  |
| REACTOME_P75_NTR_RECEPTOR_MEDIATED_SIGNALLING                                              | 79 | 0.210563 | 0.692214 | 0.9844237  | 0.9928695  | 1 | 2885  |
| REACTOME_SIGNALLING_BY_BMP                                                                 | 21 | 0.263774 | 0.69077  | 0.87616825 | 0.9910225  | 1 | 4471  |
| REACTOME_CTLA4_INHIBITORY_SIGNALLING                                                       | 19 | 0.27077  | 0.685635 | 0.88941175 | 0.9921806  | 1 | 4017  |
| BIOCARTA_ECM_PATHWAY                                                                       | 24 | 0.258711 | 0.684961 | 0.913486   | 0.9896728  | 1 | 6151  |
| BIOCARTA_AKT_PATHWAY                                                                       | 20 | 0.26825  | 0.678527 | 0.89320385 | 0.9915761  | 1 | 5033  |
| BIOCARTA_IGF1R_PATHWAY                                                                     | 22 | 0.25784  | 0.66813  | 0.90951276 | 0.9959315  | 1 | 8870  |
| REACTOME_CIRCADIAN_CLOCK                                                                   | 49 | 0.220549 | 0.667369 | 0.97680414 | 0.99338967 | 1 | 5796  |
| BIOCARTA_HDAC_PATHWAY                                                                      | 26 | 0.244853 | 0.660639 | 0.92957747 | 0.9945235  | 1 | 7203  |
| REACTOME_LATENT_INFECTION_OF_HOMO_SAPIENS_WITH_MYCOBACTERIUM_TUBERCULOSIS                  | 30 | 0.24224  | 0.660095 | 0.92561984 | 0.9918345  | 1 | 7127  |
| REACTOME_CLASS_B_2_SECRETIN_FAMILY_RECEPTORS                                               | 67 | 0.20182  | 0.657849 | 0.994429   | 0.99029386 | 1 | 3572  |
| BIOCARTA_TEL_PATHWAY                                                                       | 18 | 0.268798 | 0.654044 | 0.9178744  | 0.9897232  | 1 | 7032  |
| KEGG_FATTY_ACID_METABOLISM                                                                 | 38 | 0.21791  | 0.648345 | 0.9614396  | 0.9899922  | 1 | 2710  |
| REACTOME_REGULATION_OF_INSULIN_SECRETION_BY_GLUCAGON_LIKE_PEPTIDE1                         | 37 | 0.221832 | 0.642486 | 0.9514563  | 0.9902519  | 1 | 5154  |
| BIOCARTA_FCER1_PATHWAY                                                                     | 36 | 0.215791 | 0.637713 | 0.9748111  | 0.9897374  | 1 | 2831  |
| REACTOME_REGULATION_OF_WATER_BALANCE_BY_RENAL_AQUAPORINS                                   | 38 | 0.214891 | 0.624516 | 0.9691517  | 0.9930952  | 1 | 5877  |
| REACTOME_TRANSFERRIN_ENDOCYTOSIS_AND_RECYCLING                                             | 24 | 0.230602 | 0.612281 | 0.9625293  | 0.9952525  | 1 | 6375  |
| REACTOME_ENERGY_DEPENDENT_REGULATION_OF_MTOR_BY_LKB1_AMPK                                  | 17 | 0.247289 | 0.606279 | 0.94549763 | 0.9945977  | 1 | 4116  |
| REACTOME_FATTY_ACYL_COA_BIOSYNTHESIS                                                       | 18 | 0.23974  | 0.605789 | 0.95591646 | 0.99180514 | 1 | 712   |
| KEGG_RIBOSOME                                                                              | 87 | 0.174154 | 0.588277 | 0.99681526 | 0.9943779  | 1 | 5220  |
| REACTOME_NRF1_SIGNALS_CELL_DEATH_FROM_THE_NUCLEUS                                          | 15 | 0.220933 | 0.5307   | 0.96511626 | 1          | 1 | 1046  |
| BIOCARTA_CERAMIDE_PATHWAY                                                                  | 22 | 0.20748  | 0.530025 | 0.990099   | 1          | 1 | 6921  |
| REACTOME_TGF_BETA_RECEPTOR_SIGNALLING_IN_EMT_EPITHELIAL_TO_MESENCHYMAL_TRANSITION          | 15 | 0.219892 | 0.522174 | 0.9744186  | 0.9987877  | 1 | 1046  |
| KEGG_PORPHYRIN_AND_CHLOROPHYLL_METABOLISM                                                  | 34 | 0.175859 | 0.507369 | 0.9974619  | 0.9974923  | 1 | 2731  |
| REACTOME_GLUCAGON_SIGNALLING_IN_METABOLIC_REGULATION                                       | 30 | 0.168902 | 0.469727 | 0.9972826  | 0.99754775 | 1 | 5877  |











## Table S15

### List of Aneuploidy-associated SASP genes and IFNA gene set

| <b>Aneuploidy-associated SASP</b> | <b>IFNA gene set</b> |
|-----------------------------------|----------------------|
| AREG                              | IFNA6                |
| CCL2                              | IFNA8                |
| CCL20                             | IFNA21               |
| CCL3                              | IFNA5                |
| CSF1                              | IFNA16               |
| CSF2                              | IFNA10               |
| CXCL1                             | IFNA2                |
| CXCL2                             | IFNA1                |
| EREG                              | IFNA7                |
| FAS                               | IFNA14               |
| FGF2                              | IFNA13               |
| ICAM1                             | IFNA17               |
| IGFBP2                            | IFNA4                |
| IL1A                              |                      |
| IL1B                              |                      |
| IL6                               |                      |
| LIF                               |                      |
| MMP1                              |                      |
| MMP2                              |                      |
| CXCL8                             |                      |





|                                                                                                                                      |     |          |          |            |            |   |      |
|--------------------------------------------------------------------------------------------------------------------------------------|-----|----------|----------|------------|------------|---|------|
| KEGG_BASAL_TRANSCRIPTION_FACTORS                                                                                                     | 34  | 0.325361 | 0.903558 | 0.6112532  | 0.8989622  | 1 | 6119 |
| REACTOME_SIGNALING_BY_ROBO_RECEPTOR                                                                                                  | 29  | 0.340909 | 0.89683  | 0.6340326  | 0.9136431  | 1 | 3995 |
| REACTOME_G1_PHASE                                                                                                                    | 35  | 0.323864 | 0.896035 | 0.64028776 | 0.9114048  | 1 | 6312 |
| REACTOME_MITOCHONDRIAL_TRNA_AMINOACYLATION                                                                                           | 21  | 0.369118 | 0.895043 | 0.60954446 | 0.9094593  | 1 | 3562 |
| KEGG_PROXIMAL_TUBULE_BICARBONATE_RECLAMATION                                                                                         | 23  | 0.359846 | 0.89421  | 0.6270023  | 0.9073314  | 1 | 3827 |
| BIOCARTA_P53HYPOXIA_PATHWAY                                                                                                          | 22  | 0.368836 | 0.893575 | 0.6273148  | 0.9045066  | 1 | 1501 |
| REACTOME_INTERACTION_BETWEEN_L1_AND_ANKYRINS                                                                                         | 21  | 0.365477 | 0.892616 | 0.61777776 | 0.90262    | 1 | 583  |
| REACTOME_KINESINS                                                                                                                    | 23  | 0.358895 | 0.888883 | 0.6218679  | 0.90824825 | 1 | 9101 |
| REACTOME_METABOLISM_OF_POLYAMINES                                                                                                    | 15  | 0.395075 | 0.883043 | 0.6231884  | 0.9194484  | 1 | 688  |
| KEGG_PHENYLALANINE_METABOLISM                                                                                                        | 18  | 0.379926 | 0.881748 | 0.63053095 | 0.9186142  | 1 | 4676 |
| REACTOME_METABOLISM_OF_PROTEINS                                                                                                      | 421 | 0.226706 | 0.88063  | 0.94074076 | 0.9170738  | 1 | 4530 |
| REACTOME_STEROID_HORMONES                                                                                                            | 28  | 0.338296 | 0.878596 | 0.62690353 | 0.91781265 | 1 | 567  |
| REACTOME_RNA_POL_III_TRANSCRIPTION_TERMINATION                                                                                       | 19  | 0.360596 | 0.877485 | 0.64444447 | 0.91631633 | 1 | 6458 |
| BIOCARTA_MITOCHONDRIA_PATHWAY                                                                                                        | 21  | 0.353299 | 0.877229 | 0.6396396  | 0.9127416  | 1 | 2470 |
| REACTOME_SULFUR_AMINO_ACID_METABOLISM                                                                                                | 24  | 0.352228 | 0.876941 | 0.63752663 | 0.9092441  | 1 | 795  |
| REACTOME_SHC1_EVENTS_IN_EGFR_SIGNALING                                                                                               | 15  | 0.387488 | 0.875552 | 0.6272727  | 0.9087133  | 1 | 5036 |
| KEGG_TASTE_TRANSDUCTION                                                                                                              | 44  | 0.299893 | 0.874578 | 0.6968912  | 0.90697443 | 1 | 3726 |
| REACTOME_REGULATION_OF_INSULIN_LIKE_GROWTH_FACTOR_IGF_ACTIVITY_BY_INSULIN_LIKE_GROWTH_FACTOR_BINDING_PROTEINS_IGFBPS                 | 16  | 0.375159 | 0.873693 | 0.6332623  | 0.9049986  | 1 | 1572 |
| REACTOME_RORA_ACTIVATES_CIRCADIAN_EXPRESSION                                                                                         | 24  | 0.345304 | 0.871394 | 0.6595289  | 0.9063157  | 1 | 5049 |
| REACTOME_HIV_LIFE_CYCLE                                                                                                              | 114 | 0.259519 | 0.871377 | 0.81528664 | 0.90222454 | 1 | 4103 |
| REACTOME_PLATELET_SENSITIZATION_BY_LDL                                                                                               | 16  | 0.386782 | 0.869662 | 0.6260504  | 0.9021305  | 1 | 1916 |
| KEGG_PANTOTHENATE_AND_COA_BIOSYNTHESIS                                                                                               | 16  | 0.384878 | 0.864637 | 0.6515151  | 0.91033673 | 1 | 57   |
| REACTOME_HOMOLOGOUS_RECOMBINATION_REPAIR_OF_REPLICATION_INDEPENDENT_DOUBLE_STRAND_BREAKS                                             | 16  | 0.372275 | 0.862205 | 0.66317993 | 0.91178536 | 1 | 4366 |
| REACTOME_CHYLOMICRON_MEDIATED_LIPID_TRANSPORT                                                                                        | 16  | 0.380346 | 0.862128 | 0.6292373  | 0.9079215  | 1 | 2587 |
| REACTOME_SHC1_EVENTS_IN_ERBB4_SIGNALING                                                                                              | 20  | 0.360113 | 0.860327 | 0.67264575 | 0.9080713  | 1 | 5111 |
| REACTOME_INFLUENZA_LIFE_CYCLE                                                                                                        | 136 | 0.250668 | 0.860059 | 0.8722628  | 0.9046037  | 1 | 4103 |
| REACTOME_SYNTHESIS_AND_INTERCONVERSION_OF_NUCLEOTIDE_DI_AND_TRIPHOSPHATES                                                            | 18  | 0.362619 | 0.850298 | 0.6731602  | 0.9231615  | 1 | 4189 |
| BIOCARTA_CELLCYCLE_PATHWAY                                                                                                           | 23  | 0.338512 | 0.848326 | 0.6989011  | 0.92342734 | 1 | 930  |
| REACTOME_PRE_NOTCH_TRANSCRIPTION_AND_TRANSLATION                                                                                     | 27  | 0.323538 | 0.83762  | 0.7083333  | 0.9434212  | 1 | 1753 |
| KEGG_MELANOMA                                                                                                                        | 71  | 0.271067 | 0.83679  | 0.82058823 | 0.9411162  | 1 | 3820 |
| BIOCARTA_ATM_PATHWAY                                                                                                                 | 20  | 0.348762 | 0.836148 | 0.7256637  | 0.9382481  | 1 | 663  |
| KEGG_SNARE_INTERACTIONS_IN_VESICULAR_TRANSPORT                                                                                       | 38  | 0.302018 | 0.83443  | 0.7582697  | 0.93781126 | 1 | 2611 |
| REACTOME_NCAM_SIGNALING_FOR_NEURITE_OUT_GROWTH                                                                                       | 64  | 0.272018 | 0.830339 | 0.8060109  | 0.9422419  | 1 | 320  |
| REACTOME_RNA_POL_I_TRANSCRIPTION_TERMINATION                                                                                         | 21  | 0.332772 | 0.823584 | 0.72789115 | 0.9522546  | 1 | 3370 |
| KEGG_MISMATCH_REPAIR                                                                                                                 | 23  | 0.328809 | 0.820438 | 0.7256637  | 0.95464194 | 1 | 3384 |
| KEGG_THYROID_CANCER                                                                                                                  | 29  | 0.311783 | 0.816313 | 0.7791262  | 0.9586997  | 1 | 5177 |
| REACTOME_PREFOLDIN_MEDIATED_TRANSFER_OF_SUBSTRATE_TO_CCT_TRIC                                                                        | 25  | 0.322651 | 0.810479 | 0.7710843  | 0.96577865 | 1 | 2271 |
| BIOCARTA_ACTIN_PATHWAY                                                                                                               | 20  | 0.339542 | 0.809163 | 0.75838923 | 0.9641299  | 1 | 3294 |
| REACTOME_SIGNALING_BY_TGF_BETA_RECEPTOR_COMPLEX                                                                                      | 60  | 0.261314 | 0.805983 | 0.8518519  | 0.9662671  | 1 | 3029 |
| REACTOME_SIGNALING_BY_CONSTITUTIVELY_ACTIVE_EGFR                                                                                     | 17  | 0.344139 | 0.798326 | 0.75789475 | 0.976252   | 1 | 2531 |
| REACTOME_ZINC_TRANSPORTERS                                                                                                           | 15  | 0.345745 | 0.7953   | 0.7694013  | 0.97761196 | 1 | 3133 |
| REACTOME_Glutamate_NEUROTRANSMITTER_RELEASE_CYCLE                                                                                    | 15  | 0.350117 | 0.790896 | 0.76626015 | 0.9812927  | 1 | 1089 |
| BIOCARTA_ERK_PATHWAY                                                                                                                 | 28  | 0.304815 | 0.78599  | 0.82988507 | 0.9856851  | 1 | 5036 |
| REACTOME_POST_TRANSLATIONAL_PROTEIN_MODIFICATION                                                                                     | 179 | 0.21791  | 0.782628 | 0.99615383 | 0.98714775 | 1 | 4324 |
| KEGG_PROSTATE_CANCER                                                                                                                 | 88  | 0.238026 | 0.768428 | 0.9478528  | 1          | 1 | 3034 |
| BIOCARTA_AML_PATHWAY                                                                                                                 | 20  | 0.313301 | 0.767067 | 0.8198198  | 1          | 1 | 4906 |
| REACTOME_DOUBLE_STRAND_BREAK_REPAIR                                                                                                  | 22  | 0.309711 | 0.763524 | 0.8249453  | 1          | 1 | 4366 |
| REACTOME_PROCESSING_OF_CAPPED_INTRONLESS_PRE_MRNA                                                                                    | 23  | 0.317277 | 0.763391 | 0.8149883  | 1          | 1 | 6132 |
| BIOCARTA_PITX2_PATHWAY                                                                                                               | 15  | 0.343267 | 0.758531 | 0.8097448  | 1          | 1 | 6152 |
| REACTOME_RNA_POL_III_CHAIN_ELONGATION                                                                                                | 17  | 0.329405 | 0.754798 | 0.8314351  | 1          | 1 | 6458 |
| REACTOME_BIOSYNTHESIS_OF_THE_N_GLYCAN_PRECURSOR_DOLICHOL_LIPID_LINKED_OLIGOSACCHARIDE_LLO_AND_TRANSFER_TO_A_NASCENT_PROTEIN          | 28  | 0.288774 | 0.751642 | 0.85131896 | 1          | 1 | 1530 |
| REACTOME_APC_CDC20_MEDIATED_DEGRADATION_OF_NEK2A                                                                                     | 21  | 0.302184 | 0.739707 | 0.86206895 | 1          | 1 | 2333 |
| REACTOME_PI_3K_CASCADE                                                                                                               | 54  | 0.247967 | 0.732334 | 0.9587912  | 1          | 1 | 3488 |
| REACTOME_SIGNALING_BY_INSULIN_RECEPTOR                                                                                               | 104 | 0.214653 | 0.72562  | 0.9755245  | 1          | 1 | 3268 |
| REACTOME_SYNTHESIS_OF_GLYCOSYLPHOSPHATIDYLINOSITOL_GPI                                                                               | 17  | 0.317487 | 0.718085 | 0.8532495  | 1          | 1 | 5578 |
| REACTOME_PURINE_METABOLISM                                                                                                           | 33  | 0.265501 | 0.711552 | 0.9110577  | 1          | 1 | 3467 |
| REACTOME_SMAD2_SMAD3_SMAD4_HETEROTRIMER_REGULATES_TRANSCRIPTION                                                                      | 25  | 0.281972 | 0.707454 | 0.8727273  | 1          | 1 | 6239 |
| BIOCARTA_HIF_PATHWAY                                                                                                                 | 15  | 0.318605 | 0.70286  | 0.87142855 | 1          | 1 | 6268 |
| BIOCARTA_G1_PATHWAY                                                                                                                  | 28  | 0.266252 | 0.702377 | 0.91079813 | 1          | 1 | 5574 |
| REACTOME_A_TETRASACCHARIDE_LINKER_SEQUENCE_IS_REQUIRED_FOR_GAG_SYNTHESIS                                                             | 25  | 0.279409 | 0.698494 | 0.9166667  | 1          | 1 | 994  |
| REACTOME_HS_GAG_DEGRADATION                                                                                                          | 20  | 0.287705 | 0.693345 | 0.9031532  | 1          | 1 | 3526 |
| REACTOME_CIRCADIAN_CLOCK                                                                                                             | 51  | 0.237343 | 0.69305  | 0.9506493  | 1          | 1 | 6362 |
| REACTOME_BMAL1_CLOCK_NPAS2_ACTIVATES_CIRCADIAN_EXPRESSION                                                                            | 35  | 0.252101 | 0.690605 | 0.9514563  | 1          | 1 | 4899 |
| REACTOME_RNA_POL_III_TRANSCRIPTION_INITIATION_FROM_TYPE_3_PROMOTER                                                                   | 26  | 0.26938  | 0.686316 | 0.9320843  | 1          | 1 | 6458 |
| REACTOME_P13K_EVENTS_IN_ERBB2_SIGNALING                                                                                              | 42  | 0.242959 | 0.68472  | 0.97783935 | 1          | 1 | 2531 |
| REACTOME_DEADENYLATION_OF_MRNA                                                                                                       | 19  | 0.281857 | 0.671377 | 0.9273128  | 1          | 1 | 4664 |
| KEGG_O_GLYCAN_BIOSYNTHESIS                                                                                                           | 29  | 0.253753 | 0.668192 | 0.9649123  | 1          | 1 | 3404 |
| REACTOME_INSULIN_RECEPTOR_SIGNALING_CASCADE                                                                                          | 84  | 0.207176 | 0.667062 | 0.99680513 | 1          | 1 | 3268 |
| REACTOME_TRANSLATION                                                                                                                 | 147 | 0.187013 | 0.652252 | 1          | 1          | 1 | 3509 |
| REACTOME_NUCLEAR_RECEPTOR_TRANSCRIPTION_PATHWAY                                                                                      | 47  | 0.228047 | 0.650082 | 0.984252   | 1          | 1 | 1168 |
| KEGG_NUCLEOTIDE_EXCISION_REPAIR                                                                                                      | 44  | 0.220619 | 0.642355 | 0.9727723  | 1          | 1 | 6900 |
| KEGG_ONE_CARBON_POOL_BY_FOLATE                                                                                                       | 17  | 0.275636 | 0.638603 | 0.9252137  | 1          | 1 | 7894 |
| REACTOME_CIRCADIAN_REPRESSION_OF_EXPRESSION_BY_REV_ERBA                                                                              | 23  | 0.255637 | 0.634617 | 0.95681816 | 1          | 1 | 4899 |
| BIOCARTA_SHH_PATHWAY                                                                                                                 | 16  | 0.273708 | 0.629782 | 0.9413043  | 1          | 1 | 4751 |
| REACTOME_TRANSFERRIN_ENDOCYTOSIS_AND_RECYCLING                                                                                       | 24  | 0.248904 | 0.621073 | 0.96803653 | 1          | 1 | 4666 |
| REACTOME_SHC_MEDIATED_SIGNALING                                                                                                      | 15  | 0.271423 | 0.611833 | 0.9527027  | 1          | 1 | 1655 |
| REACTOME_TRANSCRIPTIONAL_ACTIVITY_OF_SMAD2_SMAD3_SMAD4_HETEROTRIMER                                                                  | 36  | 0.218394 | 0.603626 | 0.99731183 | 1          | 1 | 6239 |
| REACTOME_SRP_DEPENDENT_COTRANSLATIONAL_PROTEIN_TARGETING_TO_MEMBRANE                                                                 | 110 | 0.175991 | 0.589149 | 1          | 1          | 1 | 2081 |
| REACTOME_INFLUENZA_VIRAL_RNA_TRANSCRIPTION_AND_REPLICATION                                                                           | 102 | 0.170044 | 0.568726 | 1          | 1          | 1 | 2081 |
| REACTOME_SHC_RELATED_EVENTS                                                                                                          | 17  | 0.245577 | 0.565353 | 0.9774775  | 1          | 1 | 1655 |
| BIOCARTA_BARRESTIN_SRC_PATHWAY                                                                                                       | 15  | 0.243879 | 0.54886  | 0.98004436 | 1          | 1 | 6303 |
| REACTOME_INHIBITION_OF_THE_PROTEOLYTIC_ACTIVITY_OF_APC_C_REQUIRED_FOR_THE_ONSET_OF_ANAPHASE_BY_MITOTIC_SPINDLE_CHECKPOINT_COMPONENTS | 18  | 0.222638 | 0.51956  | 0.9912088  | 1          | 1 | 2333 |
| REACTOME_CTNNB1_PHOSPHORYLATION_CASCADE                                                                                              | 16  | 0.210932 | 0.484911 | 0.9843049  | 1          | 1 | 6152 |
| BIOCARTA_CERAMIDE_PATHWAY                                                                                                            | 22  | 0.194343 | 0.4739   | 0.9977064  | 1          | 1 | 5983 |
| KEGG_TERPENOID_BACKBONE_BIOSYNTHESIS                                                                                                 | 15  | 0.204606 | 0.455568 | 0.9958592  | 1          | 1 | 6952 |
| REACTOME_ENERGY_DEPENDENT_REGULATION_OF_MTOR_BY_LKB1_AMPK                                                                            | 17  | 0.154424 | 0.362149 | 1          | 0.9999491  | 1 | 7332 |

















|                                                                                                                                      |     |          |          |            |            |   |      |
|--------------------------------------------------------------------------------------------------------------------------------------|-----|----------|----------|------------|------------|---|------|
| REACTOME_A_TETRASACCHARIDE_LINKER_SEQUENCE_IS_REQUIRED_FOR_GAG_SYNTHESIS                                                             | 25  | 0.32839  | 0.838496 | 0.7311321  | 0.974537   | 1 | 1151 |
| REACTOME_GLYCOSE_METABOLISM                                                                                                          | 64  | 0.269366 | 0.83769  | 0.81556195 | 0.9713127  | 1 | 3497 |
| KEGG_PURINE_METABOLISM                                                                                                               | 156 | 0.232621 | 0.834497 | 0.9366516  | 0.9738739  | 1 | 4431 |
| KEGG_PANTOTHENATE_AND_COA_BIOSYNTHESIS                                                                                               | 16  | 0.367397 | 0.833408 | 0.6859504  | 0.9713969  | 1 | 1211 |
| KEGG_GLYCOGEN_PATHWAY                                                                                                                | 28  | 0.31768  | 0.832433 | 0.73965937 | 0.9688097  | 1 | 3052 |
| REACTOME_GLYCERATE_NEUROTRANSMITTER_RELEASE_CYCLE                                                                                    | 15  | 0.366501 | 0.822135 | 0.7120879  | 0.9857624  | 1 | 754  |
| REACTOME_KINESINS                                                                                                                    | 23  | 0.324903 | 0.821806 | 0.72596157 | 0.98155564 | 1 | 8375 |
| REACTOME_DOUBLE_STRAND_BREAK_REPAIR                                                                                                  | 22  | 0.327565 | 0.821786 | 0.7278761  | 0.9768117  | 1 | 59   |
| KEGG_SPHINGOLIPID_METABOLISM                                                                                                         | 39  | 0.291055 | 0.821786 | 0.8109589  | 0.9720699  | 1 | 3709 |
| REACTOME_SHC1_EVENTS_IN_EGFR_SIGNALING                                                                                               | 15  | 0.356468 | 0.821719 | 0.7        | 0.96753186 | 1 | 4473 |
| KEGG_PORPHYRIN_AND_CHLOROPHYLL_METABOLISM                                                                                            | 39  | 0.285283 | 0.816964 | 0.78446114 | 0.97232    | 1 | 3223 |
| REACTOME_DARPP32_EVENTS                                                                                                              | 24  | 0.318266 | 0.811709 | 0.77261615 | 0.97792643 | 1 | 949  |
| KEGG_SMALL_CELL_LUNG_CANCER                                                                                                          | 84  | 0.248463 | 0.810873 | 0.88387096 | 0.97491497 | 1 | 3664 |
| REACTOME_INHIBITION_OF_THE_PROTEOLYTIC_ACTIVITY_OF_APC_C_REQUIRED_FOR_THE_ONSET_OF_ANAPHASE_BY_MITOTIC_SPINDLE_CHECKPOINT_COMPONENTS | 18  | 0.338813 | 0.810336 | 0.7201835  | 0.97126454 | 1 | 5433 |
| REACTOME_DOWNREGULATION_OF_TGF_BETA_RECEPTOR_SIGNALING                                                                               | 21  | 0.32006  | 0.798857 | 0.7644445  | 0.9878821  | 1 | 4774 |
| KEGG_MISMATCH_REPAIR                                                                                                                 | 23  | 0.308993 | 0.794459 | 0.7701422  | 0.9909085  | 1 | 4758 |
| REACTOME_MITOCHONDRIAL_TRNA_AMINOACYLATION                                                                                           | 21  | 0.325317 | 0.793601 | 0.75296915 | 0.98770875 | 1 | 2998 |
| REACTOME_GLYCATION_CONJUGATION                                                                                                       | 22  | 0.315715 | 0.788675 | 0.8053528  | 0.9916118  | 1 | 5216 |
| REACTOME_G1_PHASE                                                                                                                    | 35  | 0.282498 | 0.787875 | 0.83937824 | 0.98849857 | 1 | 3163 |
| REACTOME_RNA_POL_III_TRANSCRIPTION_TERMINATION                                                                                       | 19  | 0.328696 | 0.787057 | 0.78483605 | 0.9853419  | 1 | 4406 |
| REACTOME_ZINC_TRANSPORTERS                                                                                                           | 15  | 0.343266 | 0.780698 | 0.7827051  | 0.9911039  | 1 | 4637 |
| REACTOME_PTM_GAMMA_CARBOXYLATION_HYPUISINE_FORMATION_AND_ARYLSULFATASE_ACTIVATION                                                    | 26  | 0.304187 | 0.779905 | 0.81113803 | 0.9878738  | 1 | 1559 |
| REACTOME_FATTY_ACID_TRIACYLGLYCEROL_AND_KETONE_BODY_METABOLISM                                                                       | 167 | 0.215497 | 0.776877 | 0.9834025  | 0.9880686  | 1 | 3371 |
| KEGG_PITX2_PATHWAY                                                                                                                   | 15  | 0.338221 | 0.771901 | 0.77102804 | 0.9913178  | 1 | 1633 |
| REACTOME_RNA_POL_III_CHAIN_ELONGATION                                                                                                | 17  | 0.326992 | 0.768899 | 0.81100476 | 0.9911907  | 1 | 4406 |
| REACTOME_METABOLISM_OF_STEROID_HORMONES_AND_VITAMINS_A_AND_D                                                                         | 34  | 0.273971 | 0.764574 | 0.8682927  | 0.9930346  | 1 | 1822 |
| KEGG_ATRBRA_PATHWAY                                                                                                                  | 21  | 0.309393 | 0.760355 | 0.79334915 | 0.99437445 | 1 | 2328 |
| KEGG_PRIMARY_BILE_ACID_BIOSYNTHESIS                                                                                                  | 16  | 0.322802 | 0.750778 | 0.81400967 | 1          | 1 | 5074 |
| KEGG_BETA_ALANINE_METABOLISM                                                                                                         | 22  | 0.299269 | 0.745157 | 0.85091746 | 1          | 1 | 2261 |
| REACTOME_AMINE_LIGAND_BINDING_RECEPTORS                                                                                              | 30  | 0.271046 | 0.734404 | 0.90076333 | 1          | 1 | 901  |
| KEGG_OOCYTE_MEIOSIS                                                                                                                  | 111 | 0.215373 | 0.728819 | 0.9895105  | 1          | 1 | 5205 |
| REACTOME_PREFOLDIN_MEDIATED_TRANSFER_OF_SUBSTRATE_TO_CCT_TRIC                                                                        | 25  | 0.278434 | 0.7208   | 0.89772725 | 1          | 1 | 3296 |
| KEGG_PROSTATE_CANCER                                                                                                                 | 88  | 0.221018 | 0.718948 | 0.990625   | 1          | 1 | 4208 |
| REACTOME_NCAM_SIGNALING_FOR_NEURITE_OUT_GROWTH                                                                                       | 64  | 0.227021 | 0.71584  | 0.96438354 | 1          | 1 | 3886 |
| REACTOME_GLOBAL_GENOMIC_NER_GG_NER                                                                                                   | 33  | 0.259129 | 0.711103 | 0.89646465 | 1          | 1 | 4834 |
| REACTOME_BIOSYNTHESIS_OF_THE_N_GLYCAN_PRECURSOR_DOLICHOL_LIPID_LINKED_O_LIGOSACCHARIDE_LLO_AND_TRANSFER_TO_A_NASCENT_PROTEIN         | 28  | 0.271005 | 0.701739 | 0.9147465  | 1          | 1 | 3001 |
| REACTOME_CONVERSION_FROM_APC_C_CDC20_TO_APC_C_CDH1_IN_LATE_ANAPHASE                                                                  | 16  | 0.301917 | 0.701196 | 0.86946905 | 1          | 1 | 5433 |
| REACTOME_ACYL_CHAIN_REMODELLING_OF_PG                                                                                                | 15  | 0.301446 | 0.688813 | 0.87782806 | 1          | 1 | 1410 |
| REACTOME_TGF_BETA_RECEPTOR_SIGNALING_ACTIVATES_SMADS                                                                                 | 24  | 0.266147 | 0.686114 | 0.94183445 | 1          | 1 | 4774 |
| KEGG_CARM_ER_PATHWAY                                                                                                                 | 35  | 0.243743 | 0.67777  | 0.95595855 | 1          | 1 | 4511 |
| REACTOME_PYRUVATE_METABOLISM                                                                                                         | 18  | 0.283381 | 0.674789 | 0.9057971  | 1          | 1 | 4520 |
| REACTOME_STEROID_HORMONES                                                                                                            | 28  | 0.258219 | 0.671929 | 0.9443038  | 1          | 1 | 386  |
| REACTOME_GRB2_EVENTS_IN_ERBB2_SIGNALING                                                                                              | 22  | 0.263886 | 0.663835 | 0.9413093  | 1          | 1 | 6560 |
| KEGG_OTHER_GLYCAN_DEGRADATION                                                                                                        | 16  | 0.286161 | 0.660193 | 0.8975501  | 1          | 1 | 1205 |
| KEGG_EIF_PATHWAY                                                                                                                     | 16  | 0.28344  | 0.656585 | 0.93453723 | 1          | 1 | 1474 |
| KEGG_BLADDER_CANCER                                                                                                                  | 42  | 0.229964 | 0.651932 | 0.97461927 | 1          | 1 | 3770 |
| KEGG_DRUG_METABOLISM_OTHER_ENZYMES                                                                                                   | 49  | 0.222539 | 0.649809 | 0.9848101  | 1          | 1 | 2834 |
| REACTOME_PHOSPHORYLATION_OF_THE_APC_C                                                                                                | 17  | 0.279755 | 0.647967 | 0.92410713 | 1          | 1 | 5433 |
| REACTOME_PI3K_CASCADE                                                                                                                | 54  | 0.213189 | 0.645941 | 0.98559076 | 1          | 1 | 5381 |
| KEGG_AGR_PATHWAY                                                                                                                     | 36  | 0.229651 | 0.635679 | 0.97105265 | 1          | 1 | 3135 |
| REACTOME_SYNTHESIS_OF_BILE_ACIDS_AND_BILE_SALTS_VIA_7ALPHA_HYDROXYCHOLESTEROL                                                        | 15  | 0.278441 | 0.630066 | 0.9263158  | 1          | 1 | 5600 |
| REACTOME_APC_C_CDC20_MEDIATED_DEGRADATION_OF_CYCLIN_B                                                                                | 19  | 0.262629 | 0.629567 | 0.947619   | 0.99813354 | 1 | 5433 |
| KEGG_NDKDYNAMIN_PATHWAY                                                                                                              | 18  | 0.269743 | 0.625561 | 0.94725275 | 0.9957655  | 1 | 3132 |
| REACTOME_PPARA_ACTIVATES_GENE_EXPRESSION                                                                                             | 104 | 0.187198 | 0.625293 | 1          | 0.99188656 | 1 | 3371 |
| REACTOME_INFLUENZA_LIFE_CYCLE                                                                                                        | 136 | 0.175907 | 0.621058 | 1          | 0.98961276 | 1 | 4617 |
| REACTOME_SYNTHESIS_OF_BILE_ACIDS_AND_BILE_SALTS                                                                                      | 19  | 0.253764 | 0.617989 | 0.9675174  | 0.9868294  | 1 | 5600 |
| REACTOME_SHC_MEDIATED_SIGNALING                                                                                                      | 15  | 0.262253 | 0.584576 | 0.9622222  | 0.992697   | 1 | 4473 |
| KEGG_SHH_PATHWAY                                                                                                                     | 16  | 0.25386  | 0.584095 | 0.96351933 | 0.9888904  | 1 | 3455 |
| REACTOME_METABOLISM_OF_VITAMINS_AND_COFACTORS                                                                                        | 50  | 0.18014  | 0.540497 | 0.99710983 | 0.9927477  | 1 | 3207 |













|                                                                      |     |           |           |            |            |   |                                     |
|----------------------------------------------------------------------|-----|-----------|-----------|------------|------------|---|-------------------------------------|
| REACTOME_INSULIN_SYNTHESIS_AND_PROCESSING                            | 20  | -0.320024 | -0.715567 | 0.8460177  | 0.9760173  | 1 | 4503 tags=30%, list=23%, signal=39% |
| KEGG_ALPHA_LINOLENIC_ACID_METABOLISM                                 | 15  | -0.335895 | -0.714253 | 0.83302754 | 0.9755561  | 1 | 2148 tags=33%, list=11%, signal=37% |
| REACTOME_METAL_ION_SLC_TRANSPORTERS                                  | 22  | -0.309791 | -0.71005  | 0.8894831  | 0.9782005  | 1 | 1683 tags=14%, list=9%, signal=15%  |
| REACTOME_PI3K_CASCADE                                                | 68  | -0.249406 | -0.706686 | 0.9582043  | 0.9797577  | 1 | 3970 tags=24%, list=21%, signal=30% |
| REACTOME_L1CAM_INTERACTIONS                                          | 84  | -0.24142  | -0.705869 | 0.9636099  | 0.97878844 | 1 | 3352 tags=19%, list=17%, signal=23% |
| REACTOME_SIGNALING_BY_BMP                                            | 22  | -0.30503  | -0.703371 | 0.8705674  | 0.9793487  | 1 | 3409 tags=27%, list=18%, signal=33% |
| REACTOME_DEADENYLATION_OF_MRNA                                       | 19  | -0.312823 | -0.699452 | 0.8938849  | 0.98124206 | 1 | 3622 tags=32%, list=19%, signal=39% |
| REACTOME_SIGNALING_BY_INSULIN_RECEPTOR                               | 104 | -0.232768 | -0.698298 | 0.9818689  | 0.98050326 | 1 | 4344 tags=27%, list=22%, signal=35% |
| REACTOME_FORMATION_OF_INCISION_COMPLEX_IN_GG_NER                     | 21  | -0.301442 | -0.692932 | 0.9027778  | 0.9836121  | 1 | 2407 tags=19%, list=12%, signal=22% |
| KEGG_VIBRIO_CHOLERAE_INFECTION                                       | 53  | -0.254406 | -0.690984 | 0.9330065  | 0.9835881  | 1 | 1852 tags=13%, list=10%, signal=15% |
| KEGG_GLYCOSAMINOGLYCAN_BIOSYNTHESIS_CHONDROITIN_SULFATE              | 22  | -0.297505 | -0.684483 | 0.91071427 | 0.9872328  | 1 | 1999 tags=18%, list=10%, signal=20% |
| REACTOME_ENOS_ACTIVATION_AND_REGULATION                              | 19  | -0.302111 | -0.679006 | 0.90575916 | 0.9898656  | 1 | 269 tags=5%, list=1%, signal=5%     |
| KEGG_PROXIMAL_TUBULE_BICARBONATE_RECLAMATION                         | 23  | -0.284239 | -0.663994 | 0.902439   | 0.9963672  | 1 | 2875 tags=30%, list=15%, signal=36% |
| REACTOME_TRANSLATION                                                 | 147 | -0.21329  | -0.663994 | 0.9945726  | 0.9971091  | 1 | 3977 tags=16%, list=21%, signal=20% |
| REACTOME_RNA_POL_III_TRANSCRIPTION_INITIATION_FROM_TYPE_3_PROMOTER   | 26  | -0.278229 | -0.661865 | 0.9394464  | 0.9966464  | 1 | 171 tags=4%, list=1%, signal=4%     |
| REACTOME_SRP_DEPENDENT_COTRANSLATIONAL_PROTEIN_TARGETING_TO_MEMBRANE | 110 | -0.217884 | -0.65727  | 0.9958449  | 0.9978254  | 1 | 3977 tags=16%, list=21%, signal=20% |
| REACTOME_PURINE_METABOLISM                                           | 33  | -0.262993 | -0.656635 | 0.950764   | 0.9964178  | 1 | 3856 tags=30%, list=20%, signal=38% |
| REACTOME_INSULIN_RECEPTOR_SIGNALING_CASCADE                          | 84  | -0.226203 | -0.655465 | 0.99277455 | 0.99537104 | 1 | 4344 tags=26%, list=22%, signal=34% |
| BIOCARTA_RACCYCD_PATHWAY                                             | 26  | -0.2737   | -0.65368  | 0.9324547  | 0.9946653  | 1 | 2656 tags=15%, list=14%, signal=18% |
| BIOCARTA_ACTINY_PATHWAY                                              | 20  | -0.295755 | -0.649893 | 0.91943955 | 0.99524635 | 1 | 3621 tags=30%, list=19%, signal=37% |
| REACTOME_CHONDROITIN_SULFATE_BIOSYNTHESIS                            | 19  | -0.289207 | -0.645917 | 0.94727594 | 0.99582535 | 1 | 4786 tags=42%, list=25%, signal=56% |
| REACTOME_ACTIVATED_AMPK_STIMULATES_FATTY_ACID_OXIDATION_IN_MUSCLE    | 18  | -0.28986  | -0.638158 | 0.9381818  | 0.99837476 | 1 | 3070 tags=28%, list=16%, signal=33% |
| REACTOME_INSULIN_RECEPTOR_RECYCLING                                  | 22  | -0.275272 | -0.634939 | 0.9300341  | 0.99821424 | 1 | 5227 tags=45%, list=27%, signal=62% |
| REACTOME_PI3K_EVENTS_IN_ERBB2_SIGNALING                              | 42  | -0.241929 | -0.632374 | 0.9549249  | 0.9977341  | 1 | 3733 tags=17%, list=19%, signal=21% |
| REACTOME_METABOLISM_OF_PROTEINS                                      | 421 | -0.185197 | -0.630972 | 1          | 0.99663234 | 1 | 3701 tags=16%, list=19%, signal=19% |
| BIOCARTA_CK1_PATHWAY                                                 | 17  | -0.288032 | -0.623582 | 0.914611   | 0.998367   | 1 | 5505 tags=47%, list=28%, signal=66% |
| REACTOME_ENERGY_DEPENDENT_REGULATION_OF_MTOR_BY_LKB1_AMPK            | 17  | -0.282806 | -0.61727  | 0.9310987  | 0.9994191  | 1 | 3070 tags=29%, list=16%, signal=35% |
| REACTOME_CITRIC_ACID_CYCLE_TCA_CYCLE                                 | 19  | -0.267336 | -0.599544 | 0.9607843  | 1          | 1 | 5253 tags=32%, list=27%, signal=43% |
| REACTOME_SIGNALING_BY_CONSTITUTIVELY_ACTIVE_EGFR                     | 17  | -0.265338 | -0.588285 | 0.9634146  | 1          | 1 | 4276 tags=29%, list=22%, signal=38% |
| BIOCARTA_BARRESTIN_SRC_PATHWAY                                       | 15  | -0.276828 | -0.584767 | 0.9669725  | 1          | 1 | 2656 tags=27%, list=14%, signal=31% |
| REACTOME_TRANSFERRIN_ENDOCYTOSIS_AND_RECYCLING                       | 24  | -0.246405 | -0.57551  | 0.97727275 | 1          | 1 | 5227 tags=46%, list=27%, signal=63% |
| REACTOME_CYCLIN_A_B1_ASSOCIATED_EVENTS_DURING_G2_M_TRANSITION        | 15  | -0.265094 | -0.568964 | 0.9715808  | 1          | 1 | 2081 tags=13%, list=11%, signal=15% |
| KEGG_OLFACTORY_TRANSDUCTION                                          | 118 | -0.183274 | -0.563515 | 1          | 1          | 1 | 5428 tags=21%, list=28%, signal=29% |
| REACTOME_SYNTHESIS_SECRETION_AND_INACTIVATION_OF_GLP1                | 17  | -0.253845 | -0.544989 | 0.96892136 | 1          | 1 | 3220 tags=18%, list=17%, signal=21% |
| REACTOME_PYRUVATE_METABOLISM_AND_CITRIC_ACID_TCA_CYCLE               | 40  | -0.204317 | -0.534722 | 0.996748   | 1          | 1 | 3887 tags=18%, list=20%, signal=22% |
| REACTOME_SHC_RELATED_EVENTS                                          | 17  | -0.242006 | -0.532551 | 0.97806215 | 1          | 1 | 4344 tags=41%, list=22%, signal=53% |
| REACTOME_CREB_PHOSPHORYLATION_THROUGH_THE_ACTIVATION_OF_CAMKII       | 15  | -0.24108  | -0.519183 | 0.9842209  | 1          | 1 | 4957 tags=47%, list=26%, signal=63% |
| REACTOME_RECYCLING_PATHWAY_OF_L1                                     | 27  | -0.210367 | -0.504187 | 0.9935065  | 1          | 1 | 5710 tags=37%, list=30%, signal=52% |
| REACTOME_INCRETIN_SYNTHESIS_SECRETION_AND_INACTIVATION               | 20  | -0.221099 | -0.497781 | 0.9894921  | 1          | 1 | 3220 tags=15%, list=17%, signal=18% |
| REACTOME_PIP3_ACTIVATES_AKT_SIGNALING                                | 27  | -0.203992 | -0.485553 | 0.99823636 | 1          | 1 | 5180 tags=26%, list=27%, signal=35% |
| REACTOME_SHC1_EVENTS_IN_ERBB4_SIGNALING                              | 20  | -0.214823 | -0.479978 | 0.9893617  | 1          | 1 | 4344 tags=30%, list=22%, signal=39% |
| BIOCARTA_P53HYPOXIA_PATHWAY                                          | 22  | -0.208517 | -0.476881 | 0.9929453  | 0.99877846 | 1 | 4807 tags=27%, list=25%, signal=36% |
| REACTOME_OLFACTORY_SIGNALING_PATHWAY                                 | 80  | -0.150169 | -0.427563 | 1          | 0.99907035 | 1 | 4055 tags=11%, list=21%, signal=14% |

**Table S20**  
**Association between SASP signature pathway and copy number alterations in HPV-negative HNSC cell lines.**

**S20A**

**Logistic Regression for the prediction of SASP enrichment in HNSC cell lines (CCLE) - after separating arm-level and focal-level loss at 9p21.3**

Distinction between tumors showing arm-only, focal-only events and a combination of both.

**SASP enrichment**

Top and bottom 35% of the distributions were considered.

|                    | $\beta$ coefficient | z value   | Pr(> z ) | FDR      | OR             |
|--------------------|---------------------|-----------|----------|----------|----------------|
| 9p21.3 Loss: ARM   | -3.465736           | -2.619891 | 0.008796 | 0.017592 | 0.03125 binary |
| 9p21.3 Loss: FOCAL | -2.772589           | -1.711297 | 0.087026 | 0.087026 | 0.0625 binary  |

For each copy number event, we used copy number values after standardization.

|                                | $\beta$ coefficient | z value   | Pr(> z ) | FDR      | OR                  |
|--------------------------------|---------------------|-----------|----------|----------|---------------------|
| 9p21.3 copy number ARM Level   | 0.7924514           | 1.646595  | 0.099641 | 0.199283 | 2.208804 continuous |
| 9p21.3 copy number FOCAL Level | -34.3869968         | -0.006174 | 0.995074 | 0.995074 | 1.16E-15 continuous |

**SASP enrichment**

Top and bottom 50% of the distributions were considered.

|                    | $\beta$ coefficient | z value   | Pr(> z ) | FDR      | OR              |
|--------------------|---------------------|-----------|----------|----------|-----------------|
| 9p21.3 Loss: ARM   | -1.856298           | -2.155478 | 0.031124 | 0.062249 | 0.15625 binary  |
| 9p21.3 Loss: FOCAL | -1.974081           | -1.552584 | 0.120523 | 0.120523 | 0.138889 binary |

For each copy number event, we used copy number values after standardization.

|                                | $\beta$ coefficient | z value   | Pr(> z ) | FDR      | OR                  |
|--------------------------------|---------------------|-----------|----------|----------|---------------------|
| 9p21.3 copy number ARM Level   | 0.4695842           | 1.186006  | 0.23562  | 0.47124  | 1.599329 continuous |
| 9p21.3 copy number FOCAL Level | -33.6715041         | -0.006905 | 0.994491 | 0.994491 | 2.38E-15 continuous |

**SASP enrichment**

Top and bottom 35% of the distributions were considered.

|                    | $\beta$ coefficient | z value   | Pr(> z ) | FDR      | OR                  |
|--------------------|---------------------|-----------|----------|----------|---------------------|
| 9p21.3 Loss: ARM   | -4.852692           | -2.509997 | 0.012073 | 0.03622  | 0.007807 binary     |
| 9p21.3 Loss: FOCAL | -4.884157           | -2.112046 | 0.034663 | 0.052024 | 0.007565 binary     |
| SCNA level         | -1.531852           | -1.718469 | 0.085711 | 0.085711 | 0.216135 continuous |

For each copy number event, we used copy number values after standardization.

|                                | $\beta$ coefficient | z value   | Pr(> z ) | FDR      | OR                  |
|--------------------------------|---------------------|-----------|----------|----------|---------------------|
| 9p21.3 copy number ARM Level   | 0.8971552           | 1.763381  | 0.077836 | 0.233509 | 2.452616 continuous |
| 9p21.3 copy number FOCAL Level | -34.017447          | -0.005999 | 0.995214 | 0.995214 | 1.68E-15 continuous |
| SCNA level                     | -0.6681904          | -1.22247  | 0.22153  | 0.332295 | 0.512635 continuous |

**S20B**

**Logistic Regression for the prediction of SASP enrichment in HNSC cell lines (CCLE) - after separating arm-level and focal-level loss at 3p14.**

Distinction between tumors showing arm-only, focal-only events and a combination of both.

**SASP enrichment**

Top and bottom 35% of the distributions were considered.

|                  | $\beta$ coefficient | z value   | Pr(> z ) | FDR      | OR              |
|------------------|---------------------|-----------|----------|----------|-----------------|
| 3p14 Loss: ARM   | -0.5596158          | -0.420888 | 0.673837 | 0.673837 | 0.571429 binary |
| 3p14 Loss: FOCAL | -1.7917595          | -1.064464 | 0.287118 | 0.574237 | 0.166667 binary |

For each copy number event, we used copy number values after standardization.

|                              | $\beta$ coefficient | z value  | Pr(> z ) | FDR      | OR                  |
|------------------------------|---------------------|----------|----------|----------|---------------------|
| 3p14 copy number ARM Level   | -0.3296374          | -0.64421 | 0.519439 | 0.519439 | 0.719184 continuous |
| 3p14 copy number FOCAL Level | 0.9255492           | 1.015226 | 0.309998 | 0.519439 | 2.523254 continuous |

**SASP enrichment**

Top and bottom 50% of the distributions were considered.

|                  | $\beta$ coefficient | z value   | Pr(> z ) | FDR      | OR              |
|------------------|---------------------|-----------|----------|----------|-----------------|
| 3p14 Loss: ARM   | -0.2231436          | -0.221307 | 0.824853 | 0.824853 | 0.8 binary      |
| 3p14 Loss: FOCAL | -1.7917595          | -1.241368 | 0.21447  | 0.42894  | 0.166667 binary |

For each copy number event, we used copy number values after standardization.

|                              | $\beta$ coefficient | z value   | Pr(> z ) | FDR      | OR                  |
|------------------------------|---------------------|-----------|----------|----------|---------------------|
| 3p14 copy number ARM Level   | -0.4207858          | -0.964783 | 0.334654 | 0.334654 | 0.656531 continuous |
| 3p14 copy number FOCAL Level | 0.9358364           | 1.08422   | 0.278267 | 0.334654 | 2.549345 continuous |

**SASP enrichment**

Top and bottom 35% of the distributions were considered.

|                  | $\beta$ coefficient | z value   | Pr(> z ) | FDR      | OR                  |
|------------------|---------------------|-----------|----------|----------|---------------------|
| 3p14 Loss: ARM   | -0.5015306          | -0.373447 | 0.708816 | 0.708816 | 0.605603 binary     |
| 3p14 Loss: FOCAL | -1.733305           | -1.017104 | 0.309104 | 0.563351 | 0.176699 binary     |
| SCNA level       | -0.4339868          | -0.886093 | 0.375568 | 0.563351 | 0.647921 continuous |

For each copy number event, we used copy number values after standardization.

|                              | $\beta$ coefficient | z value   | Pr(> z ) | FDR      | OR                  |
|------------------------------|---------------------|-----------|----------|----------|---------------------|
| 3p14 copy number ARM Level   | -0.1552262          | -0.287761 | 0.77353  | 0.77353  | 0.856221 continuous |
| 3p14 copy number FOCAL Level | 1.2632036           | 1.188531  | 0.234624 | 0.383854 | 3.536734 continuous |
| SCNA level                   | -0.6588838          | -1.136447 | 0.255769 | 0.383854 | 0.517439 continuous |











|                                                                                            |     |             |           |            |            |   |      |
|--------------------------------------------------------------------------------------------|-----|-------------|-----------|------------|------------|---|------|
| REACTOME_APC_C_CDC20_MEDIATED_DEGRADATION_OF_CYCLIN_B                                      | 19  | -0.41498    | -0.909393 | 0.58894646 | 0.7684364  | 1 | 109  |
| BIOCARTA_ARF_PATHWAY                                                                       | 17  | -0.428125   | -0.908937 | 0.6299484  | 0.76785415 | 1 | 2990 |
| REACTOME_METABOLISM_OF_PROTEINS                                                            | 422 | -0.285477   | -0.907225 | 0.7312296  | 0.76974905 | 1 | 3044 |
| KEGG_TASTE_TRANSDUCTION                                                                    | 51  | -0.348326   | -0.904195 | 0.63338304 | 0.774478   | 1 | 2098 |
| REACTOME_BIOSYNTHESIS_OF_THE_N_GLYCAN_PRECURSOR_DOLICHOH_LIPID_LINKED_OLIGOSACCHARIDE_LL   | 28  | -0.394092   | -0.901959 | 0.6196513  | 0.777535   | 1 | 3344 |
| REACTOME_PRE_NOTCH_PROCESSING_IN_GOLGI                                                     | 16  | -0.438637   | -0.900337 | 0.62432915 | 0.7793128  | 1 | 3431 |
| REACTOME_SYNTHESIS_OF_BILE_ACIDS_AND_BILE_SALTS                                            | 19  | -0.413569   | -0.898448 | 0.6211382  | 0.78149563 | 1 | 3661 |
| REACTOME_UNFOLDED_PROTEIN_RESPONSE                                                         | 76  | -0.330674   | -0.894229 | 0.6526459  | 0.78860307 | 1 | 2440 |
| REACTOME_ACTIVATION_OF_NF_KAPPAB_IN_B_CELLS                                                | 61  | -0.343775   | -0.893682 | 0.6495957  | 0.7881682  | 1 | 2223 |
| KEGG_GLYCOLYTIC_SIGNALING_PATHWAY                                                          | 67  | -0.320263   | -0.89146  | 0.6592479  | 0.791114   | 1 | 2345 |
| REACTOME_PHASEI_FUNCTIONALIZATION_OF_COMPOUNDS                                             | 69  | -0.33116473 | -0.891285 | 0.6676301  | 0.7988373  | 1 | 3661 |
| REACTOME_PROSTACYCLIN_SIGNALING_THROUGH_PROSTACYCLIN_RECEPTOR                              | 19  | -0.413617   | -0.889327 | 0.6471572  | 0.7922459  | 1 | 897  |
| REACTOME_KERATAN_SULFATE_BIOSYNTHESIS                                                      | 26  | -0.385801   | -0.889512 | 0.6286201  | 0.79226935 | 1 | 3431 |
| REACTOME_ADP_SIGNALING_THROUGH_P2RY1                                                       | 25  | -0.394867   | -0.888414 | 0.62222224 | 0.79085326 | 1 | 1117 |
| KEGG_WNT_SIGNALING_PATHWAY                                                                 | 150 | -0.300921   | -0.887246 | 0.72095805 | 0.79167455 | 1 | 2949 |
| REACTOME_DOWNSTREAM_SIGNALING_EVENTS_OF_B_CELL_RECEPTOR_BCR                                | 92  | -0.31852    | -0.886073 | 0.65539664 | 0.7922254  | 1 | 2223 |
| REACTOME_AMYLOIDS                                                                          | 76  | -0.326171   | -0.884749 | 0.66944444 | 0.7933415  | 1 | 2394 |
| REACTOME_BOTULINUM_NEUROTOXICITY                                                           | 18  | -0.420018   | -0.884047 | 0.62051284 | 0.79310703 | 1 | 2065 |
| KEGG_NICOTINATE_AND_NICOTINAMIDE_METABOLISM                                                | 24  | -0.392834   | -0.882619 | 0.6628478  | 0.7942912  | 1 | 3368 |
| REACTOME_ACTIVATION_OF_THE_MRNA_UPON_BINDING_OF_THE_CAP_BINDING_COMPLEX_AND_EIF5_AND_SUE   | 57  | -0.336226   | -0.877202 | 0.66248256 | 0.8036385  | 1 | 5815 |
| REACTOME_PHOSPHORYLATION_OF_THE_APC_C                                                      | 17  | -0.409407   | -0.876864 | 0.63468015 | 0.8026842  | 1 | 109  |
| KEGG_BETA_ALANINE_METABOLISM                                                               | 22  | -0.393923   | -0.87537  | 0.65139115 | 0.80404234 | 1 | 3821 |
| KEGG_GLYCOSAMINOGLYCAN_BIOSYNTHESIS_HEPARAN_SULFATE                                        | 26  | -0.38109    | -0.875035 | 0.63857377 | 0.8030728  | 1 | 3235 |
| REACTOME_MAPK_TARGETS_NUCLEAR_EVENTS_MEDIATED_BY_MAP_KINASES                               | 30  | -0.369852   | -0.872363 | 0.64162755 | 0.8066701  | 1 | 5935 |
| REACTOME_TRANS_GOLGI_NETWORK_VESICLE_BUDDING                                               | 59  | -0.329536   | -0.868586 | 0.68265164 | 0.812729   | 1 | 4072 |
| KEGG_BUTANOATE_METABOLISM                                                                  | 34  | -0.359569   | -0.864747 | 0.68621236 | 0.81886595 | 1 | 1896 |
| REACTOME_ENDOGENOUS_STEROLS                                                                | 15  | -0.408557   | -0.860498 | 0.66972476 | 0.8254858  | 1 | 4340 |
| KEGG_AMINOACYL_TRNA_BIOSYNTHESIS                                                           | 41  | -0.345852   | -0.859603 | 0.7016743  | 0.82561976 | 1 | 659  |
| KEGG_NOTCH_SIGNALING_PATHWAY                                                               | 47  | -0.33395    | -0.859478 | 0.69777775 | 0.8242276  | 1 | 988  |
| KEGG_ADIPOLYTIC_SIGNALING_PATHWAY                                                          | 67  | -0.322748   | -0.859392 | 0.7590249  | 0.82774824 | 1 | 1716 |
| KEGG_SPHINGOLIPID_METABOLISM                                                               | 39  | -0.342416   | -0.851348 | 0.70750386 | 0.8364014  | 1 | 2626 |
| REACTOME_TRNA_AMINOACYLATION                                                               | 42  | -0.340455   | -0.847261 | 0.71080667 | 0.84269583 | 1 | 659  |
| BIOCARTA_IGF1MTOX_PATHWAY                                                                  | 20  | -0.391613   | -0.845424 | 0.68585527 | 0.84451026 | 1 | 2825 |
| REACTOME_REGULATION_OF_MRNA_STABILITY_BY_PROTEINS_THAT_BIND_AU_RICH_ELEMENTS               | 81  | -0.30738    | -0.845097 | 0.7455296  | 0.843501   | 1 | 2223 |
| REACTOME_TRANSPORT_OF_GLUCOSE_AND_OTHER_SUGARS_BILE_SALTS_AND_ORGANIC_ACIDS_METAL_IONS     | 89  | -0.304972   | -0.844614 | 0.7520107  | 0.84270555 | 1 | 3349 |
| KEGG_PHENYLALANINE_METABOLISM                                                              | 18  | -0.390474   | -0.843251 | 0.679868   | 0.8438651  | 1 | 2344 |
| REACTOME_SLC_MEDIATED_TRANSMEMBRANE_TRANSPORT                                              | 240 | -0.271032   | -0.833869 | 0.837963   | 0.8594955  | 1 | 2512 |
| KEGG_P53_SIGNALING_PATHWAY                                                                 | 67  | -0.308986   | -0.833002 | 0.7479893  | 0.8593835  | 1 | 1892 |
| KEGG_VIBRIO_CHOLERAE_INFECTION                                                             | 54  | -0.319407   | -0.828957 | 0.754173   | 0.8653242  | 1 | 1626 |
| REACTOME_GOLGI_ASSOCIATED_VESICLE_BIOSYNTHESIS                                             | 52  | -0.323384   | -0.82626  | 0.7684515  | 0.868613   | 1 | 4072 |
| REACTOME_INWARDLY_RECTIFYING_K_CHANNELS                                                    | 31  | -0.345383   | -0.826066 | 0.74615383 | 0.8672585  | 1 | 2135 |
| REACTOME_CELL_JUNCTION_ORGANIZATION                                                        | 77  | -0.299217   | -0.826025 | 0.79727894 | 0.865639   | 1 | 3265 |
| KEGG_SMALL_CELL_LUNG_CANCER                                                                | 84  | -0.299082   | -0.821688 | 0.7911051  | 0.87196344 | 1 | 3594 |
| REACTOME_GABA_SYNTHESIS_RELEASE_REUPTAKE_AND_DEGRADATION                                   | 17  | -0.394891   | -0.821045 | 0.71428573 | 0.8713924  | 1 | 3753 |
| REACTOME_DESTABILIZATION_OF_MRNA_BY_BRF1                                                   | 17  | -0.382653   | -0.819127 | 0.714527   | 0.8729923  | 1 | 3717 |
| KEGG_INOSITOL_PHOSPHATE_METABOLISM                                                         | 54  | -0.310626   | -0.810317 | 0.80780345 | 0.88664806 | 1 | 2523 |
| REACTOME_ANTIVIRAL_MECHANISM_BY_IFN_STIMULATED_GENES                                       | 65  | -0.303413   | -0.808838 | 0.8175389  | 0.8874882  | 1 | 1577 |
| KEGG_STARCH_AND_SUCROSE_METABOLISM                                                         | 49  | -0.319043   | -0.808484 | 0.7796374  | 0.8864626  | 1 | 3408 |
| REACTOME_INHIBITION_OF_VOLTAGE_GATED_CA2_CHANNELS_VIA_GBETA_GAMMA_SUBUNITS                 | 25  | -0.35546    | -0.807793 | 0.7451613  | 0.8859923  | 1 | 2135 |
| REACTOME_DARPP_32_EVENTS                                                                   | 24  | -0.349992   | -0.80476  | 0.7590249  | 0.8859926  | 1 | 5094 |
| REACTOME_GLUCAAGON_TYPE_LIGAND_RECEPTORS                                                   | 33  | -0.330969   | -0.803665 | 0.7816265  | 0.88978523 | 1 | 1475 |
| REACTOME_INHIBITION_OF_THE_PROTEOLYTIC_ACTIVITY_OF_APC_C_REQUIRED_FOR_THE_ONSET_OF_ANAPHAS | 18  | -0.376164   | -0.803664 | 0.7361111  | 0.88808715 | 1 | 109  |
| REACTOME_SIGNALING_BY_NOTCH                                                                | 99  | -0.284701   | -0.802705 | 0.85128206 | 0.8880725  | 1 | 3515 |
| REACTOME_SIGNALING_BY_FGFR1_MUTANTS                                                        | 28  | -0.342527   | -0.801833 | 0.7755102  | 0.887816   | 1 | 3053 |
| REACTOME_NEPHRIN_INTERACTIONS                                                              | 19  | -0.369823   | -0.798597 | 0.7350877  | 0.89163345 | 1 | 5792 |
| BIOCARTA_AML_PATHWAY                                                                       | 20  | -0.374604   | -0.794875 | 0.7615894  | 0.8960689  | 1 | 4830 |
| REACTOME_INSULIN_SYNTHESIS_AND_PROCESSING                                                  | 20  | -0.361479   | -0.79047  | 0.7436333  | 0.9015925  | 1 | 2955 |
| REACTOME_PRE_NOTCH_TRANSCRIPTION_AND_TRANSLATION                                           | 27  | -0.339037   | -0.788273 | 0.7752066  | 0.9033928  | 1 | 89   |
| REACTOME_FORMATION_OF_INCISION_COMPLEX_IN_GG_NER                                           | 21  | -0.353711   | -0.787033 | 0.7561779  | 0.9037108  | 1 | 14   |
| REACTOME_CTNNB1_PHOSPHORYLATION_CASCADE                                                    | 16  | -0.376249   | -0.78695  | 0.76584506 | 0.90215254 | 1 | 602  |
| BIOCARTA_MTA3_PATHWAY                                                                      | 19  | -0.359245   | -0.784736 | 0.7740303  | 0.90410954 | 1 | 4105 |
| REACTOME_XENOBIOTICS                                                                       | 15  | -0.375519   | -0.784479 | 0.7474403  | 0.90286434 | 1 | 4760 |
| KEGG_SELENOAMINO_ACID_METABOLISM                                                           | 26  | -0.340402   | -0.784298 | 0.79375    | 0.90146804 | 1 | 1889 |
| BIOCARTA_MPR_PATHWAY                                                                       | 34  | -0.326529   | -0.784008 | 0.7893916  | 0.90026    | 1 | 4320 |
| KEGG_GLYCOSAMINOGLYCAN_BIOSYNTHESIS_CHONDROITIN_SULFATE                                    | 22  | -0.341931   | -0.776564 | 0.779661   | 0.91003215 | 1 | 3498 |
| REACTOME_GLYCOGEN_BREAKDOWN_GLYCOGENOLYSIS                                                 | 16  | -0.373035   | -0.774704 | 0.7804878  | 0.9113505  | 1 | 1197 |
| REACTOME_ABCA_TRANSPORTERS_IN_LIPID_HOMEOSTASIS                                            | 17  | -0.365823   | -0.77086  | 0.8044218  | 0.91568774 | 1 | 5158 |
| REACTOME_METAL_ION_SLC_TRANSPORTERS                                                        | 22  | -0.343155   | -0.770264 | 0.8039867  | 0.9148409  | 1 | 2378 |
| REACTOME_PURINE_METABOLISM                                                                 | 33  | -0.319243   | -0.768295 | 0.796875   | 0.9161606  | 1 | 1796 |
| REACTOME_COX2_TRANSMITTER_RESPIRATORY_ELECTRON_TRANSPORT                                   | 20  | -0.326931   | -0.7652   | 0.8076076  | 0.9169076  | 1 | 220  |
| REACTOME_NEUROTRANSMITTER_RELEASE_CYCLE                                                    | 34  | -0.319367   | -0.764318 | 0.84326017 | 0.91844934 | 1 | 3753 |
| REACTOME_SIGNALING_BY_ROBO_RECEPTOR                                                        | 29  | -0.318613   | -0.757674 | 0.83548385 | 0.926346   | 1 | 4671 |
| REACTOME_GLUCAAGON_SIGNALING_IN_METABOLIC_REGULATION                                       | 33  | -0.315015   | -0.755597 | 0.8539157  | 0.92767715 | 1 | 1681 |
| REACTOME_REGULATION_OF_APOPTOSIS                                                           | 56  | -0.289258   | -0.755315 | 0.8809182  | 0.92639977 | 1 | 2223 |
| REACTOME_SIGNAL_TRANSDUCTION_BY_L1                                                         | 34  | -0.311378   | -0.75415  | 0.84076434 | 0.92633367 | 1 | 4685 |
| REACTOME_VOLTAGE_GATED_POTASSIUM_CHANNELS                                                  | 43  | -0.301416   | -0.750408 | 0.8781575  | 0.92968476 | 1 | 1606 |
| REACTOME_INFLUENZA_LIFE_CYCLE                                                              | 136 | -0.255666   | -0.742948 | 0.9520295  | 0.93770105 | 1 | 718  |
| REACTOME_GAB1_SIGNALOSOME                                                                  | 36  | -0.300756   | -0.739129 | 0.8556391  | 0.9408471  | 1 | 3307 |
| KEGG_UBIQUITIN_MEDIATED_PROTEOLYSIS                                                        | 134 | -0.252953   | -0.733906 | 0.9455006  | 0.94553185 | 1 | 1927 |
| BIOCARTA_TNFR1_PATHWAY                                                                     | 29  | -0.308342   | -0.730797 | 0.86846274 | 0.94763726 | 1 | 4095 |
| REACTOME_DOWNREGULATION_OF_TGF_BETA_RECEPTOR_SIGNALING                                     | 21  | -0.326935   | -0.724071 | 0.8598616  | 0.95381194 | 1 | 268  |
| REACTOME_DEADENYLATION_DEPENDENT_MRNA_DECAY                                                | 44  | -0.284287   | -0.718413 | 0.9138973  | 0.9584092  | 1 | 1997 |
| REACTOME_REGULATION_OF_INSULIN_LIKE_GROWTH_FACTOR_IGF_ACTIVITY_BY_INSULIN_LIKE_GROWTH_FACT | 16  | -0.341021   | -0.718235 | 0.83779263 | 0.95690286 | 1 | 2729 |
| KEGG_ALPHA_LINOLENIC_ACID_METABOLISM                                                       | 17  | -0.344082   | -0.718169 | 0.840604   | 0.95527446 | 1 | 3098 |
| REACTOME_BMAL1_CLOCK_NPAS2_ACTIVATES_CIRCADIAN_EXPRESSION                                  | 36  | -0.290552   | -0.714093 | 0.9050536  | 0.95800055 | 1 | 3598 |
| REACTOME_GLUCOSE_METABOLISM                                                                | 64  | -0.268994   | -0.713682 | 0.9374131  | 0.95675236 | 1 | 1197 |
| REACTOME_ACYL_CHAIN_REMODELLING_OF_PG                                                      | 16  | -0.345389   | -0.713307 | 0.82807016 | 0.95545001 | 1 | 2063 |
| KEGG_OLFACTORY_TRANSDUCTION                                                                | 346 | -0.225016   | -0.708377 | 1          | 0.95884    | 1 | 5777 |
| REACTOME_TGF_BETA_RECEPTOR_SIGNALING_ACTIVATES_SMADS                                       | 24  | -0.307222   | -0.707935 | 0.8982512  | 0.95757596 | 1 | 268  |
| REACTOME_LIGAND_GATED_ION_CHANNEL_TRANSPORT                                                | 21  | -0.316712   | -0.701207 | 0.86551726 | 0.96255654 | 1 | 2898 |
| REACTOME_A_TETRASACCHARIDE_LINKER_SEQUENCE_IS_REQUIRED_FOR_GAG_SYNTHESIS                   | 25  | -0.301313   | -0.69909  | 0.88611543 | 0.96281976 | 1 | 4068 |
| KEGG_ALZHEIMERS_DISEASE                                                                    | 157 | -0.232236   | -0.69564  | 0.9891957  | 0.96431965 | 1 | 2680 |
| REACTOME_OLFACTORY_SIGNALING_PATHWAY                                                       | 284 | -0.220622   | -0.687443 | 1          | 0.96970683 | 1 | 6781 |
| REACTOME_L1CAM_INTERACTIONS                                                                | 84  | -0.247201   | -0.683925 | 0.9699864  | 0.97100705 | 1 | 4184 |
| KEGG_LINOLEIC_ACID_METABOLISM                                                              | 27  | -0.292624   | -0.682039 | 0.9052133  | 0.97083235 | 1 | 4812 |
| REACTOME_INTRINSIC_PATHWAY_FOR_APOPTOSIS                                                   | 29  | -0.28749    | -0.67827  | 0.92948717 | 0.9721099  | 1 | 5157 |
| REACTOME_JNK_C_JUN_KINASES_PHOSPHORYLATION_AND_ACTIVATION_MEDIATED_BY_ACTIVATED_HUMAN_TA   | 16  | -0.32721    | -0.674352 | 0.8863262  | 0.9732686  | 1 | 4095 |
| KEGG_RNA_DEGRADATION                                                                       | 57  | -0.25107    | -0.664339 | 0.9739508  | 0.9784989  | 1 | 3822 |
| REACTOME_BILE_ACID_AND_BILE_SALT_METABOLISM                                                | 27  | -0.286761   | -0.663613 | 0.9411765  | 0.9772409  | 1 | 3661 |
| REACTOME_SPHINGOLIPID_DE_NOVO_BIOSYNTHESIS                                                 | 25  | -0.293277   | -0.660608 | 0.928115   | 0.97747743 | 1 | 5607 |
| REACTOME_PRE_NOTCH_EXPRESSION_AND_PROCESSING                                               | 41  | -0.258487   | -0.657469 | 0.96879643 | 0.9778058  | 1 | 2980 |
| REACTOME_NOTCH1_INTRACELLULAR_DOMAIN_REGULATES_TRANSCRIPTION                               | 44  | -0.263583   | -0.654998 | 0.9571865  | 0.9776515  | 1 | 89   |
| REACTOME_CIRCADIAN_CLOCK                                                                   | 52  | -0.24377    | -0.64542  | 0.98107713 | 0.9816033  | 1 | 3961 |
| REACTOME_ENERGY_DEPENDENT_REGULATION_OF_MTOR_BY_LKB1_AMPK                                  | 17  | -0.301432   | -0.643621 | 0.93085104 | 0.98083603 | 1 | 539  |
| REACTOME_REGULATION_OF_BETA_CELL_DEVELOPMENT                                               | 28  | -0.277462   | -0.642456 | 0.94548285 | 0.9797443  | 1 | 4440 |
| KEGG_PYRUVATE_METABOLISM                                                                   | 40  | -0.257954   | -0.64213  | 0.9618768  | 0.9781831  | 1 | 2249 |
| REACTOME_STEROID_HORMONES                                                                  | 29  | -0.260786   | -0.606871 | 0.9649123  | 0.9915026  | 1 | 3302 |
| KEGG_DORSO_VENTRAL_AXIS_FORMATION                                                          | 24  | -0.26424    | -0.598832 | 0.966129   | 0.99247366 | 1 | 3148 |
| REACTOME_SYNTHESIS_OF_BILE_ACIDS_AND_BILE_SALTS_VIA_7ALPHA_HYDROXYCHOLESTEROL              | 15  | -0.286393   | -0.583332 | 0.95614034 | 0.99505985 | 1 | 3661 |
| REACTOME_METABOLISM_OF_STEROID_HORMONES_AND_VITAMINS_A_AND_D                               | 35  | -0.228453   | -0.55668  | 0.9985251  | 0.9989997  | 1 | 3302 |
| REACTOME_TRIGLYCERIDE_BIOSYNTHESIS                                                         | 38  | -0.22488    | -0.554937 | 0.9939302  | 0.99748184 | 1 | 4177 |
| KEGG_MATURITY_ONSET_DIABETES_OF_THE_YOUNG                                                  | 23  | -0.249986   | -0.554803 | 0.98489934 | 0.9957926  | 1 | 2499 |
| REACTOME_SYNTHESIS_AND_INTERCONVERSION_OF_NUCLEOTIDE_DI_AND_TRIPHOSPHATES                  | 18  | -0.245262   | -0.518613 | 0.989547   | 0.9985278  | 1 | 3405 |
| BIOCARTA_MTOR_PATHWAY                                                                      | 23  | -0.231662   | -0.518345 | 0.9967051  | 0.99685454 | 1 | 2825 |
| REACTOME_CREB_PHOSPHORYLATION_THROUGH_THE_ACTIVATION_OF_CAMKII                             | 15  | -0.248614   | -0.512436 | 0.9876543  | 0.9956517  | 1 | 2511 |

Table S22

GSEA Analysis on HNSC cancer cell lines comparing cell lines with or without 9p21.3 focal loss, Pathways Depleted

| NAME                                                                                                           | SIZE | ES        | NES       | NOM p-value | FDR q-value | FWER p-value | RANK AT MAX |
|----------------------------------------------------------------------------------------------------------------|------|-----------|-----------|-------------|-------------|--------------|-------------|
| KEGG_OLFACTORY_TRANSDUCTION                                                                                    | 384  | -0.966582 | -1.570215 | 0           | 0           | 0            | 1460        |
| REACTOME_OLFACTORY_SIGNALING_PATHWAY                                                                           | 322  | -0.966583 | -1.519536 | 0           | 0.00181627  | 0.003        | 1460        |
| REACTOME_METABOLISM_OF_RNA                                                                                     | 282  | -0.958056 | -1.501448 | 0           | 0.002426551 | 0.007        | 1565        |
| REACTOME_METABOLISM_OF_MRNA                                                                                    | 237  | -0.958109 | -1.486494 | 0           | 0.003849077 | 0.016        | 1553        |
| REACTOME_NONSENSE_MEDIATED_DECAY_ENHANCED_BY_THE_EXON_JUNCTION_COMPLEX                                         | 135  | -0.969243 | -1.411333 | 0.010224949 | 0.065579645 | 0.295        | 1352        |
| REACTOME_3_UTR_MEDIATED_TRANSLATIONAL_REGULATION                                                               | 135  | -0.971784 | -1.38709  | 0.015151516 | 0.11254018  | 0.529        | 1242        |
| REACTOME_INFLUENZA_LIFE_CYCLE                                                                                  | 163  | -0.947652 | -1.377813 | 0.02504817  | 0.12453453  | 0.62         | 1394        |
| REACTOME_PEPTIDE_CHAIN_ELONGATION                                                                              | 114  | -0.979871 | -1.351344 | 0.017408123 | 0.21148005  | 0.842        | 886         |
| REACTOME_CELL_CYCLE_CHECKPOINTS                                                                                | 112  | -0.954638 | -1.338975 | 0.063432835 | 0.255265    | 0.917        | 1498        |
| REACTOME_MEIOSIS                                                                                               | 109  | -0.968374 | -1.336612 | 0.03018868  | 0.2445686   | 0.929        | 1326        |
| REACTOME_TRANSLATION                                                                                           | 178  | -0.895932 | -1.3313   | 0.065298505 | 0.25445583  | 0.945        | 1315        |
| KEGG_OXIDATIVE_PHOSPHORYLATION                                                                                 | 101  | -0.96227  | -1.319854 | 0.068716094 | 0.30401286  | 0.975        | 1656        |
| REACTOME_INFLUENZA_VIRAL_RNA_TRANSCRIPTION_AND_REPLICATION                                                     | 130  | -0.954472 | -1.318634 | 0.06212425  | 0.28751013  | 0.977        | 886         |
| REACTOME_MRNA_PROCESSING                                                                                       | 153  | -0.902436 | -1.303765 | 0.09665427  | 0.35262087  | 0.992        | 1444        |
| KEGG_LYSOSOME                                                                                                  | 119  | -0.933274 | -1.289031 | 0.09811321  | 0.43243542  | 0.997        | 745         |
| REACTOME_MEIOTIC_RECOMBINATION                                                                                 | 82   | -0.97877  | -1.282584 | 0.033771105 | 0.45758796  | 0.999        | 858         |
| REACTOME_PROCESSING_OF_CAPPED_INTRON_CONTAINING_PRE_MRNA                                                       | 133  | -0.902451 | -1.279398 | 0.106343284 | 0.4559873   | 0.999        | 1444        |
| KEGG_RIBOSOME                                                                                                  | 88   | -0.962032 | -1.276651 | 0.12723657  | 0.4363941   | 0.999        | 886         |
| REACTOME_SRP_DEPENDENT_COTRANSLATIONAL_PROTEIN_TARGETING_TO_MEMBRANE                                           | 137  | -0.891906 | -1.277578 | 0.11005693  | 0.42162213  | 0.999        | 1315        |
| REACTOME_M_G1_TRANSITION                                                                                       | 79   | -0.966037 | -1.271325 | 0.123809524 | 0.44989657  | 1            | 1498        |
| KEGG_RIG_I_LIKE_RECEPTOR_SIGNALING_PATHWAY                                                                     | 69   | -0.987022 | -1.264915 | 0.024029575 | 0.48383516  | 1            | 343         |
| KEGG_PARKINSONS_DISEASE                                                                                        | 100  | -0.946655 | -1.261275 | 0.1302682   | 0.4932273   | 1            | 1611        |
| REACTOME_TCA_CYCLE_AND_RESPIRATORY_ELECTRON_TRANSPORT                                                          | 106  | -0.917339 | -1.25705  | 0.12660551  | 0.5055512   | 1            | 1167        |
| REACTOME_RNA_POL_I_RNA_POL_III_AND_MITOCHONDRIAL_TRANSCRIPTION                                                 | 117  | -0.880353 | -1.242042 | 0.16666667  | 0.62274367  | 1            | 1416        |
| REACTOME_MEIOTIC_SYNAPSIS                                                                                      | 70   | -0.969883 | -1.240017 | 0.12641509  | 0.61825067  | 1            | 1326        |
| REACTOME_ACTIVATION_OF_THE_MRNA_UPON_BINDING_OF_THE_CAP_BINDING_COMPLEX_AND_EIFS_AND_SUBSEQUENT_BINDING_TO_43S | 68   | -0.971781 | -1.237979 | 0.13518198  | 0.61422616  | 1            | 1242        |
| REACTOME_REGULATION_OF_MRNA_STABILITY_BY_PROTEINS_THAT_BIND_AU_RICH_ELEMENTS                                   | 82   | -0.940749 | -1.233865 | 0.18410853  | 0.63091195  | 1            | 1498        |
| REACTOME_ORC1_REMOVAL_FROM_CHROMATIN                                                                           | 68   | -0.966025 | -1.233612 | 0.16759777  | 0.61072023  | 1            | 1498        |
| REACTOME_REGULATION_OF_MITOTIC_CELL_CYCLE                                                                      | 76   | -0.950323 | -1.230189 | 0.18878505  | 0.6243817   | 1            | 1498        |
| REACTOME_TRANSCRIPTION                                                                                         | 195  | -0.829107 | -1.229017 | 0.15313654  | 0.6146667   | 1            | 1444        |
| REACTOME_HOST_INTERACTIONS_OF_HIV_FACTORS                                                                      | 117  | -0.886442 | -1.227058 | 0.18426104  | 0.6130133   | 1            | 1498        |
| REACTOME_CYCLIN_E_ASSOCIATED_EVENTS_DURING_G1_S_TRANSITION                                                     | 63   | -0.966004 | -1.22657  | 0.21003717  | 0.59813327  | 1            | 1498        |
| REACTOME_ASSEMBLY_OF_THE_PRE_REPLICATIVE_COMPLEX                                                               | 64   | -0.966026 | -1.226354 | 0.2021858   | 0.5818355   | 1            | 1498        |
| REACTOME_SLC_MEDIATED_TRANSMEMBRANE_TRANSPORT                                                                  | 235  | -0.8086   | -1.226095 | 0.14314516  | 0.5669874   | 1            | 1655        |
| KEGG_PPARG_SIGNALING_PATHWAY                                                                                   | 67   | -0.962528 | -1.222725 | 0.25703564  | 0.577399    | 1            | 1644        |
| REACTOME_RNA_POL_I_PROMOTER_OPENING                                                                            | 61   | -0.980558 | -1.219392 | 0.10159363  | 0.587706    | 1            | 858         |
| REACTOME_RESPIRATORY_ELECTRON_TRANSPORT                                                                        | 66   | -0.963283 | -1.21815  | 0.2326923   | 0.58088434  | 1            | 1611        |
| REACTOME_APC_C_CDC20_MEDIATED_DEGRADATION_OF_MITOTIC_PROTEINS                                                  | 66   | -0.949807 | -1.213854 | 0.24770643  | 0.5996209   | 1            | 1498        |
| REACTOME_ACTIVATION_OF_NF_KAPPAB_IN_B_CELLS                                                                    | 62   | -0.965959 | -1.212812 | 0.23597679  | 0.591823    | 1            | 1498        |
| REACTOME_FORMATION_OF_THE_TERNARY_COMPLEX_AND_SUBSEQUENTLY_THE_43S_COMPLEX                                     | 60   | -0.979851 | -1.211938 | 0.1009009   | 0.5826653   | 1            | 886         |
| REACTOME_ANTIVIRAL_MECHANISM_BY_IFN_STIMULATED_GENES                                                           | 65   | -0.966484 | -1.209872 | 0.20907298  | 0.5825583   | 1            | 1256        |
| KEGG_NOD_LIKE_RECEPTOR_SIGNALING_PATHWAY                                                                       | 59   | -0.975384 | -1.209434 | 0.14857143  | 0.5715719   | 1            | 536         |
| REACTOME_PHASE1_FUNCTIONALIZATION_OF_COMPOUNDS                                                                 | 64   | -0.964541 | -1.206815 | 0.24452555  | 0.57914436  | 1            | 1555        |
| REACTOME_DEPOSITION_OF_NEW_CENPA_CONTAINING_NUCLEOSOMES_AT_THE_CENTROMERE                                      | 61   | -0.965275 | -1.202766 | 0.24904214  | 0.59427947  | 1            | 1532        |
| REACTOME_CHROMOSOME_MAINTENANCE                                                                                | 116  | -0.869715 | -1.19787  | 0.2041237   | 0.61800783  | 1            | 1532        |
| KEGG_P53_SIGNALING_PATHWAY                                                                                     | 65   | -0.932707 | -1.196858 | 0.2818533   | 0.61229575  | 1            | 1509        |
| KEGG_RNA_DEGRADATION                                                                                           | 56   | -0.962447 | -1.19032  | 0.30952382  | 0.64977884  | 1            | 1553        |
| KEGG_P53_SIGNALING_PATHWAY                                                                                     | 57   | -0.967859 | -1.18836  | 0.23782772  | 0.6511815   | 1            | 1413        |
| KEGG_CYTOSOLIC_DNA_SENSING_PATHWAY                                                                             | 55   | -0.978574 | -1.185622 | 0.14492753  | 0.6624674   | 1            | 946         |
| REACTOME_CDT1_ASSOCIATION_WITH_THE_CDC6_ORC_ORIGIN_COMPLEX                                                     | 55   | -0.96601  | -1.180831 | 0.27376425  | 0.6880872   | 1            | 1498        |
| REACTOME_APC_C_CDH1_MEDIATED_DEGRADATION_OF_CDC20_AND_OTHER_APC_C_CDH1_TARGETED_PROTEIN                        | 65   | -0.940632 | -1.178563 | 0.3012939   | 0.69476273  | 1            | 1498        |
| REACTOME_HIV_INFECTION                                                                                         | 185  | -0.794107 | -1.177431 | 0.19361277  | 0.6912577   | 1            | 1498        |
| REACTOME_REGULATION_OF_APOPTOSIS                                                                               | 57   | -0.96363  | -1.176976 | 0.3126177   | 0.68258864  | 1            | 1498        |
| REACTOME_SCSKP2_MEDIATED_DEGRADATION_OF_P27_P21                                                                | 54   | -0.965988 | -1.176359 | 0.30215827  | 0.67477626  | 1            | 1498        |
| REACTOME_TRANSPORT_OF_MATURE_TRANSCRIPT_TO_CYTOPLASM                                                           | 51   | -0.964266 | -1.173971 | 0.36452243  | 0.68148255  | 1            | 1352        |
| REACTOME_IMMUNOREGULATORY_INTERACTIONS_BETWEEN_A_LYMPHOID_AND_A_NON_LYMPHOID_CELL                              | 52   | -0.962495 | -1.172961 | 0.3339383   | 0.67901456  | 1            | 1647        |
| REACTOME_DESTABILIZATION_OF_MRNA_BY_AUF1_HNRNP_D0                                                              | 51   | -0.966013 | -1.172326 | 0.29009008  | 0.6724569   | 1            | 1498        |
| REACTOME_SIGNALING_BY_WNT                                                                                      | 63   | -0.942804 | -1.171382 | 0.330855    | 0.6681148   | 1            | 1498        |
| REACTOME_ER_PHAGOSOME_PATHWAY                                                                                  | 54   | -0.966011 | -1.169294 | 0.3         | 0.6743329   | 1            | 1498        |
| REACTOME_PACKAGING_OF_TELOMERE_ENDS                                                                            | 48   | -0.984584 | -1.169184 | 0.11615245  | 0.66402787  | 1            | 680         |
| REACTOME_P53_DEPENDENT_G1_DNA_DAMAGE_RESPONSE                                                                  | 54   | -0.965965 | -1.164918 | 0.3134058   | 0.6877373   | 1            | 1498        |
| REACTOME_RNA_POL_I_TRANSCRIPTION                                                                               | 85   | -0.886983 | -1.161842 | 0.29704797  | 0.7029846   | 1            | 858         |
| REACTOME_REGULATION_OF_ORNITHINE_DECARBOXYLASE_ODC                                                             | 48   | -0.96597  | -1.161087 | 0.36050725  | 0.6975247   | 1            | 1498        |
| KEGG_STEROID_HORMONE_BIOSYNTHESIS                                                                              | 52   | -0.966241 | -1.159654 | 0.32688588  | 0.69901687  | 1            | 1482        |
| REACTOME_P53_INDEPENDENT_G1_S_DNA_DAMAGE_CHECKPOINT                                                            | 49   | -0.966015 | -1.159284 | 0.30922243  | 0.6908135   | 1            | 1498        |
| REACTOME_CDK_MEDIATED_PHOSPHORYLATION_AND_REMOVAL_OF_CDC6                                                      | 47   | -0.965971 | -1.1577   | 0.35728157  | 0.6944802   | 1            | 1498        |
| REACTOME_SCF_BETA_TRCP_MEDIATED_DEGRADATION_OF_EMI1                                                            | 50   | -0.965991 | -1.157087 | 0.33716476  | 0.68804353  | 1            | 1498        |
| REACTOME_TRANSMEMBRANE_TRANSPORT_OF_SMALL_MOLECULES                                                            | 402  | -0.709214 | -1.155713 | 0.17669903  | 0.68793213  | 1            | 1510        |
| SENESCENCE_ASSOCIATED_SECRETORY_PHENOTYPE                                                                      | 56   | -0.939241 | -1.155076 | 0.36753732  | 0.68371826  | 1            | 712         |
| REACTOME_AUTODEGRADATION_OF_THE_E3_UBIQUITIN_LIGASE_COP1                                                       | 48   | -0.96597  | -1.153195 | 0.35365853  | 0.68906426  | 1            | 1498        |
| REACTOME_MRNA_SPLICING                                                                                         | 105  | -0.834715 | -1.152429 | 0.2919132   | 0.6864178   | 1            | 1444        |
| REACTOME_CYTOCHROME_P450_ARRANGED_BY_SUBSTRATE_TYPE                                                            | 48   | -0.964531 | -1.150882 | 0.33273703  | 0.6906865   | 1            | 1555        |
| KEGG_N_GLYCAN_BIOSYNTHESIS                                                                                     | 46   | -0.969603 | -1.150278 | 0.30072463  | 0.6858194   | 1            | 1336        |
| REACTOME_VIF_MEDIATED_DEGRADATION_OF_APOBEC3G                                                                  | 45   | -0.965993 | -1.150106 | 0.3631068   | 0.67773026  | 1            | 1498        |
| REACTOME_G2_M_CHECKPOINTS                                                                                      | 41   | -0.967095 | -1.149411 | 0.3697632   | 0.67409104  | 1            | 1452        |
| REACTOME_CELL_CELL_JUNCTION_ORGANIZATION                                                                       | 69   | -0.899918 | -1.144182 | 0.34593573  | 0.7033701   | 1            | 1100        |
| KEGG_ABC_TRANSPORTERS                                                                                          | 42   | -0.969446 | -1.143148 | 0.34649912  | 0.7028204   | 1            | 1342        |
| REACTOME_CHEMOKINE_RECEPTORS_BIND_CHEMOKINES                                                                   | 47   | -0.958232 | -1.14198  | 0.46494466  | 0.7062116   | 1            | 1396        |
| REACTOME_AUTODEGRADATION_OF_CDH1_BY_CDH1_APC_C                                                                 | 57   | -0.927637 | -1.141967 | 0.36635515  | 0.69736284  | 1            | 1498        |
| KEGG_PROTEASOME                                                                                                | 45   | -0.965972 | -1.140106 | 0.36555362  | 0.7064526   | 1            | 1498        |
| REACTOME_AMYLOIDS                                                                                              | 79   | -0.861283 | -1.139864 | 0.34541985  | 0.6993203   | 1            | 1272        |
| REACTOME_TRNA_AMINOACYLATION                                                                                   | 42   | -0.972255 | -1.1327   | 0.30601093  | 0.746862    | 1            | 1218        |
| REACTOME_METABOLISM_OF_NON_CODING_RNA                                                                          | 48   | -0.963298 | -1.132823 | 0.41340783  | 0.7382546   | 1            | 1617        |
| KEGG_HEMATOPOIETIC_CELL_LINEAGE                                                                                | 78   | -0.868287 | -1.131879 | 0.3463687   | 0.73699206  | 1            | 545         |
| REACTOME_PYRUVATE_METABOLISM_AND_CITRIC_ACID_TCA_CYCLE                                                         | 41   | -0.964632 | -1.131211 | 0.45403376  | 0.7329017   | 1            | 1036        |
| KEGG_CYTOKINE_CYTOKINE_RECEPTOR_INTERACTION                                                                    | 246  | -0.73071  | -1.127931 | 0.25824177  | 0.75280493  | 1            | 1413        |
| REACTOME_CELL_CELL_COMMUNICATION                                                                               | 109  | -0.82682  | -1.127834 | 0.30518234  | 0.7447584   | 1            | 1100        |
| REACTOME_SIGNALING_TO_ERKS                                                                                     | 36   | -0.983743 | -1.125363 | 0.25252524  | 0.7576674   | 1            | 714         |
| REACTOME_DEADENYLATION_DEPENDENT_MRNA_DECAY                                                                    | 42   | -0.964719 | -1.124994 | 0.4342857   | 0.7517295   | 1            | 1553        |
| REACTOME_GLYCOSPHINGOLIPID_METABOLISM                                                                          | 37   | -0.983058 | -1.122821 | 0.26713532  | 0.7657651   | 1            | 745         |
| KEGG_INTESTINAL_IMMUNE_NETWORK_FOR_IGA_PRODUCTION                                                              | 33   | -0.984612 | -1.122326 | 0.23498233  | 0.7610311   | 1            | 677         |
| KEGG_GLYCEROLIPID_METABOLISM                                                                                   | 41   | -0.967145 | -1.118327 | 0.42537314  | 0.78770375  | 1            | 715         |
| KEGG_AMINOACYL_TRNA_BIOSYNTHESIS                                                                               | 41   | -0.972255 | -1.117561 | 0.37275985  | 0.7854432   | 1            | 1218        |
| KEGG_CELL_CYCLE                                                                                                | 124  | -0.799369 | -1.116212 | 0.3001912   | 0.7875411   | 1            | 1509        |
| KEGG_TRYPTOPHAN_METABOLISM                                                                                     | 39   | -0.962483 | -1.115341 | 0.49816176  | 0.78837     | 1            | 1648        |
| REACTOME_POST_NMDA_RECEPTOR_ACTIVATION_EVENTS                                                                  | 33   | -0.984087 | -1.113232 | 0.23304348  | 0.7983367   | 1            | 700         |
| KEGG_PORPHYRIN_AND_CHLOROPHYLL_METABOLISM                                                                      | 39   | -0.966228 | -1.111907 | 0.43327555  | 0.8009853   | 1            | 1482        |
| REACTOME_ACTIVATION_OF_NMDA_RECEPTOR_UPON_GLUTAMATE_BINDING_AND_POSTSYNAPTIC_EVENTS                            | 36   | -0.984086 | -1.111842 | 0.26056337  | 0.7931834   | 1            | 700         |
| REACTOME_CLEAVAGE_OF_GROWING_TRANSCRIPT_IN_THE_TERMINATION_REGION                                              | 42   | -0.967162 | -1.111176 | 0.41981983  | 0.7918292   | 1            | 1444        |
| REACTOME_MITOCHONDRIAL_PROTEIN_IMPORT                                                                          | 45   | -0.961588 | -1.107272 | 0.49371633  | 0.8221689   | 1            | 1690        |
| REACTOME_CELL_CELL_JUNCTION_ORGANIZATION                                                                       | 48   | -0.938817 | -1.106988 | 0.4954792   | 0.8160397   | 1            | 939         |
| KEGG_CELL_CYCLE                                                                                                | 32   | -0.992215 | -1.106923 | 0.20274915  | 0.8084987   | 1            | 343         |
| REACTOME_GLUCAGON_TYPE_LIGAND_RECEPTORS                                                                        | 32   | -0.986051 | -1.105766 | 0.28        | 0.8106108   | 1            | 613         |
| REACTOME_DEFENSINS                                                                                             | 36   | -0.968217 | -1.104642 | 0.45251396  | 0.81199893  | 1            | 1396        |
| KEGG_SYSTEMIC_LUPUS_ERYTHEMATOSUS                                                                              | 122  | -0.783547 | -1.104452 | 0.33641404  | 0.8057548   | 1            | 858         |
| REACTOME_CYTOKINE_SIGNALING_IN_IMMUNE_SYSTEM                                                                   | 250  | -0.715721 | -1.103731 | 0.2746615   | 0.80453926  | 1            | 1286        |

|                                                                                                                             |     |           |           |             |            |   |      |
|-----------------------------------------------------------------------------------------------------------------------------|-----|-----------|-----------|-------------|------------|---|------|
| REACTOME_GLUCOSE_TRANSPORT                                                                                                  | 37  | -0.965589 | -1.103421 | 0.4731369   | 0.8001916  | 1 | 1256 |
| KEGG_PRIMARY_IMMUNODEFICIENCY                                                                                               | 34  | -0.968903 | -1.101413 | 0.45025295  | 0.81821275 | 1 | 1367 |
| KEGG_Cysteine_and_Methionine_Metabolism                                                                                     | 34  | -0.964565 | -1.100488 | 0.5365854   | 0.8195437  | 1 | 1558 |
| REACTOME_S_PHASE                                                                                                            | 107 | -0.805954 | -1.096186 | 0.35897437  | 0.8623263  | 1 | 1498 |
| REACTOME_G_ALPHA_I_SIGNALLING_EVENTS                                                                                        | 174 | -0.745644 | -1.091785 | 0.33730158  | 0.9058555  | 1 | 1522 |
| KEGG_FRUCTOSE_AND_MANNANOSE_METABOLISM                                                                                      | 34  | -0.970593 | -1.09155  | 0.46785715  | 0.9008367  | 1 | 1292 |
| REACTOME_RNA_POL_III_TRANSCRIPTION                                                                                          | 33  | -0.967763 | -1.09044  | 0.5170068   | 0.90405005 | 1 | 1416 |
| REACTOME_ACTIVATION_OF_ATR_IN_RESPONSE_TO_REPLICATION_STRESS                                                                | 35  | -0.967053 | -1.090246 | 0.5218914   | 0.8977201  | 1 | 1452 |
| REACTOME_SYNTHESIS_OF_DNA                                                                                                   | 91  | -0.813556 | -1.089626 | 0.35907337  | 0.89848727 | 1 | 1498 |
| REACTOME_ABC_FAMILY_PROTEINS_MEDIATED_TRANSPORT                                                                             | 32  | -0.96943  | -1.08782  | 0.48951048  | 0.91378504 | 1 | 1342 |
| REACTOME_MRNA_3_END_PROCESSING                                                                                              | 33  | -0.967169 | -1.086088 | 0.50359714  | 0.9292356  | 1 | 1444 |
| REACTOME_G_ALPHA_S_SIGNALLING_EVENTS                                                                                        | 113 | -0.784283 | -1.086046 | 0.3683206   | 0.922657   | 1 | 1542 |
| KEGG_LINOLEIC_ACID_METABOLISM                                                                                               | 24  | -0.999976 | -1.086037 | 0.001652893 | 0.91612875 | 1 | 1    |
| REACTOME_SIGNAL_AMPLIFICATION                                                                                               | 30  | -0.986051 | -1.08528  | 0.30533117  | 0.92117226 | 1 | 613  |
| REACTOME_CREB_PHOSPHORYLATION_THROUGH_THE_ACTIVATION_OF_RAS                                                                 | 27  | -0.984089 | -1.083765 | 0.33275864  | 0.92992747 | 1 | 700  |
| KEGG_PRION_DISEASES                                                                                                         | 35  | -0.961286 | -1.082933 | 0.6013986   | 0.9336537  | 1 | 78   |
| REACTOME_GLUCCONEOGENESIS                                                                                                   | 32  | -0.972192 | -1.081887 | 0.45172414  | 0.9412339  | 1 | 1222 |
| REACTOME_BILE_ACID_AND_BILE_SALT_METABOLISM                                                                                 | 26  | -0.990801 | -1.080974 | 0.3136289   | 0.9433922  | 1 | 405  |
| KEGG_APOPTOSIS                                                                                                              | 81  | -0.836968 | -1.078628 | 0.43065694  | 0.9721876  | 1 | 449  |
| BIOCARTA_PGC1A_PATHWAY                                                                                                      | 23  | -0.999977 | -1.078219 | 0           | 0.9726739  | 1 | 1    |
| REACTOME_PURINE_METABOLISM                                                                                                  | 33  | -0.965776 | -1.076782 | 0.54905034  | 0.98427653 | 1 | 1505 |
| REACTOME_TRANSPORT_OF_VITAMINS_NUCLEOSIDES_AND_RELATED_MOLECULES                                                            | 30  | -0.978723 | -1.076692 | 0.41237113  | 0.9773498  | 1 | 934  |
| REACTOME_SIGNALLING_TO_RAS                                                                                                  | 27  | -0.983746 | -1.075618 | 0.36482084  | 0.9818135  | 1 | 714  |
| REACTOME_INTERACTIONS_OF_VPR_WITH_HOST_CELLULAR_PROTEINS                                                                    | 31  | -0.963289 | -1.073815 | 0.61204016  | 1          | 1 | 1617 |
| REACTOME_G_PROTEIN_ACTIVATION                                                                                               | 27  | -0.986052 | -1.073664 | 0.33840948  | 0.9957269  | 1 | 613  |
| REACTOME_TRANSPORT_OF_MATURE_MRNA_DERIVED_FROM_AN_INTRONLESS_TRANSCRIPT                                                     | 31  | -0.963289 | -1.071684 | 0.60267115  | 1          | 1 | 1617 |
| REACTOME_G_PROTEIN_BETA_GAMMA_SIGNALLING                                                                                    | 26  | -0.986052 | -1.071183 | 0.3747927   | 1          | 1 | 613  |
| REACTOME_CELL_CYCLE                                                                                                         | 394 | -0.662591 | -1.070904 | 0.32447818  | 1          | 1 | 1532 |
| REACTOME_BIOSYNTHESIS_OF_THE_N_GLYCAN_PRECURSOR_DOLICHOL_LIPID_LINKED_OLIGOSACCHARIDE_LLO_AND_TRANSFER_TO_A_NASCENT_PROTEIN | 28  | -0.985801 | -1.069572 | 0.36243823  | 1          | 1 | 625  |
| REACTOME_TRANSPORT_OF_GLUCOSE_AND_OTHER_SUGARS_BILE_SALTS_AND_ORGANIC_ACIDS_METAL_IONS_AND_AMINE_COMPOUNDS                  | 88  | -0.808334 | -1.067033 | 0.4090909   | 1          | 1 | 959  |
| REACTOME_INHIBITION_OF_INSULIN_SECRETION_BY_ADRENALINE_NORADRENALINE                                                        | 25  | -0.986053 | -1.066994 | 0.37886178  | 1          | 1 | 613  |
| KEGG_CITRATE_CYCLE_TCA_CYCLE                                                                                                | 30  | -0.966234 | -1.066525 | 0.5711864   | 1          | 1 | 609  |
| BIOCARTA_NKT_PATHWAY                                                                                                        | 29  | -0.964364 | -1.064254 | 0.61157024  | 1          | 1 | 1566 |
| REACTOME_LATENT_INFECTION_OF_HOMO_SAPIENS_WITH_MYCOBACTERIUM_TUBERCULOSIS                                                   | 31  | -0.962079 | -1.064028 | 0.6424682   | 1          | 1 | 1664 |
| BIOCARTA_CASPASE_PATHWAY                                                                                                    | 22  | -0.983474 | -1.062878 | 0.49675325  | 1          | 1 | 727  |
| KEGG_DORSO_VENTRAL_AXIS_FORMATION                                                                                           | 23  | -0.983748 | -1.062527 | 0.44301766  | 1          | 1 | 714  |
| KEGG_THYROID_CANCER                                                                                                         | 29  | -0.966048 | -1.062426 | 0.6026059   | 1          | 1 | 714  |
| KEGG_ETHER_LIPID_METABOLISM                                                                                                 | 26  | -0.975164 | -1.060816 | 0.5135135   | 1          | 1 | 1090 |
| REACTOME_BETA_DEFENSINS                                                                                                     | 28  | -0.968223 | -1.060689 | 0.59        | 1          | 1 | 1396 |
| REACTOME_TRAF6_MEDIATED_NFKB_ACTIVATION                                                                                     | 20  | -0.992217 | -1.060566 | 0.40552995  | 1          | 1 | 343  |
| REACTOME_FORMATION_OF_INCISION_COMPLEX_IN_GG_NER                                                                            | 21  | -0.999979 | -1.059947 | 0           | 1          | 1 | 1    |
| REACTOME_ADP_SIGNALLING_THROUGH_P2RY12                                                                                      | 21  | -0.986054 | -1.059938 | 0.4542536   | 1          | 1 | 613  |
| REACTOME_G_BETA_GAMMA_SIGNALLING_THROUGH_PI3K_GAMMA                                                                         | 23  | -0.986053 | -1.059349 | 0.43086818  | 1          | 1 | 613  |
| REACTOME_MITOTIC_G2_M_PHASES                                                                                                | 78  | -0.820858 | -1.058504 | 0.44444445  | 1          | 1 | 1372 |
| REACTOME_LIGAND_GATED_ION_CHANNEL_TRANSPORT                                                                                 | 20  | -0.998927 | -1.057787 | 0.3494705   | 1          | 1 | 49   |
| REACTOME_THROMBOXANE_SIGNALLING_THROUGH_TP_RECEPTOR                                                                         | 22  | -0.986054 | -1.057781 | 0.4667747   | 1          | 1 | 613  |
| REACTOME_RNA_POL_III_TRANSCRIPTION_INITIATION_FROM_TYPE_3_PROMOTER                                                          | 26  | -0.967745 | -1.056775 | 0.59126365  | 1          | 1 | 1416 |
| REACTOME_ADP_SIGNALLING_THROUGH_P2RY11                                                                                      | 24  | -0.986053 | -1.057481 | 0.45768026  | 1          | 1 | 613  |
| REACTOME_RNA_POL_I_TRANSCRIPTION_TERMINATION                                                                                | 20  | -0.99998  | -1.056357 | 0           | 1          | 1 | 1    |
| BIOCARTA_NFKB_PATHWAY                                                                                                       | 23  | -0.980154 | -1.056259 | 0.4511628   | 1          | 1 | 412  |
| BIOCARTA_CERAMIDE_PATHWAY                                                                                                   | 22  | -0.992217 | -1.056101 | 0.40758294  | 1          | 1 | 343  |
| REACTOME_ACYL_CHAIN_REMODELLING_OF_PC                                                                                       | 18  | -0.999982 | -1.055476 | 0.001512859 | 1          | 1 | 1    |
| BIOCARTA_G2_PATHWAY                                                                                                         | 24  | -0.969869 | -1.055357 | 0.59253246  | 1          | 1 | 1326 |
| KEGG_PENTOSE_AND_GLUCCURONATE_INTERCONVERSIONS                                                                              | 25  | -0.966216 | -1.055334 | 0.6337308   | 1          | 1 | 1482 |
| REACTOME_GENERATION_OF_SECOND_MESSENGER_MOLECULES                                                                           | 19  | -0.998605 | -1.055137 | 0.3903577   | 1          | 1 | 47   |
| REACTOME_ACTIVATION_OF_THE_PRE_REPLICATIVE_COMPLEX                                                                          | 30  | -0.966943 | -1.054513 | 0.6094771   | 1          | 1 | 1452 |
| REACTOME_DOWNSTREAM_SIGNALING_EVENTS_OF_B_CELL_RECEPTOR_BCR                                                                 | 93  | -0.797486 | -1.053391 | 0.44212523  | 1          | 1 | 1498 |
| REACTOME_RNA_POL_III_TRANSCRIPTION_TERMINATION                                                                              | 19  | -0.999981 | -1.052278 | 0           | 1          | 1 | 1    |
| REACTOME_MITOTIC_G1_G1_S_PHASES                                                                                             | 133 | -0.731177 | -1.051835 | 0.41016334  | 1          | 1 | 1509 |
| REACTOME_ACYL_CHAIN_REMODELLING_OF_PE                                                                                       | 17  | -0.999983 | -1.051024 | 0           | 1          | 1 | 1    |
| REACTOME_CTLA4_INHIBITORY_SIGNALING                                                                                         | 21  | -0.984611 | -1.050167 | 0.48387095  | 1          | 1 | 615  |
| REACTOME_SYNTHESIS_OF_BILE_ACIDS_AND_BILE_SALTS                                                                             | 19  | -0.999981 | -1.050047 | 0           | 1          | 1 | 1    |
| REACTOME_TIGHT_JUNCTION_INTERACTIONS                                                                                        | 27  | -0.948684 | -1.047947 | 0.687389    | 1          | 1 | 178  |
| REACTOME_ABCA_TRANSPORTERS_IN_LIPID_HOMEOSTASIS                                                                             | 17  | -0.999983 | -1.047845 | 0           | 1          | 1 | 1    |
| REACTOME_TRANSPORT_OF_RIBONUCLEOPROTEINS_INTO_THE_HOST_NUCLEUS                                                              | 26  | -0.965166 | -1.047724 | 0.6672384   | 1          | 1 | 1266 |
| REACTOME_NEP_NS2_INTERACTS_WITH_THE_CELLULAR_EXPORT_MACHINERY                                                               | 26  | -0.963271 | -1.045913 | 0.7019231   | 1          | 1 | 1617 |
| REACTOME_G_BETA_GAMMA_SIGNALLING_THROUGH_PLC_BETA                                                                           | 20  | -0.986054 | -1.044326 | 0.45625     | 1          | 1 | 613  |
| REACTOME_PROLONGED_ERK_ACTIVATION_EVENTS                                                                                    | 19  | -0.98375  | -1.043765 | 0.51309705  | 1          | 1 | 714  |
| KEGG_TYPE_I_DIABETES_MELLITUS                                                                                               | 21  | -0.977745 | -1.043627 | 0.5496063   | 1          | 1 | 32   |
| REACTOME_SYNTHESIS_OF_PIP3_AT_THE_GOLGI_MEMBRANE                                                                            | 17  | -0.999983 | -1.043517 | 0           | 1          | 1 | 1    |
| REACTOME_CYTOSOLIC_TRNA_AMINOACYLATION                                                                                      | 24  | -0.972243 | -1.043431 | 0.60720134  | 1          | 1 | 1218 |
| REACTOME_REGULATION_OF_GLUCCOKINASE_BY_GLUCCOKINASE_REGULATORY_PROTEIN                                                      | 26  | -0.964302 | -1.043394 | 0.6834171   | 1          | 1 | 1256 |
| BIOCARTA_MITOCHONDRIA_PATHWAY                                                                                               | 20  | -0.989638 | -1.043326 | 0.43661973  | 1          | 1 | 456  |
| BIOCARTA_P53_HYPOXIA_PATHWAY                                                                                                | 22  | -0.983817 | -1.043197 | 0.47351524  | 1          | 1 | 712  |
| KEGG_ALZHEIMERS_DISEASE                                                                                                     | 140 | -0.73382  | -1.042833 | 0.41040462  | 1          | 1 | 1474 |
| REACTOME_APOPTOSIS                                                                                                          | 142 | -0.725695 | -1.042557 | 0.4035433   | 1          | 1 | 1498 |
| KEGG_ALPHA_LINOLENIC_ACID_METABOLISM                                                                                        | 15  | -0.999985 | -1.042109 | 0           | 1          | 1 | 1    |
| REACTOME_DOUBLE_STRAND_BREAK_REPAIR                                                                                         | 21  | -0.979235 | -1.042025 | 0.5489891   | 1          | 1 | 680  |
| REACTOME_ENDOGENOUS_STEROLS                                                                                                 | 15  | -0.999985 | -1.041597 | 0           | 1          | 1 | 1    |
| REACTOME_RNA_POL_III_TRANSCRIPTION_INITIATION_FROM_TYPE_2_PROMOTER                                                          | 23  | -0.971673 | -1.041541 | 0.6309148   | 1          | 1 | 1243 |
| REACTOME_RNA_POL_III_CHAIN_ELONGATION                                                                                       | 17  | -0.999983 | -1.04087  | 0           | 1          | 1 | 1    |
| REACTOME_SYNTHESIS_OF_BILE_ACIDS_AND_BILE_SALTS_VIA_7ALPHA_HYDROXYCHOLESTEROL                                               | 15  | -0.999985 | -1.040817 | 0.001428571 | 1          | 1 | 1    |
| KEGG_PRIMARY_BILE_ACID_BIOSYNTHESIS                                                                                         | 16  | -0.999984 | -1.039786 | 0           | 1          | 1 | 1    |
| REACTOME_PROCESSING_OF_CAPPED_INTRONLESS_PRE_MRNA                                                                           | 23  | -0.967131 | -1.039332 | 0.66169155  | 1          | 1 | 1444 |
| BIOCARTA_CYTOKINE_PATHWAY                                                                                                   | 20  | -0.976968 | -1.038409 | 0.6         | 1          | 1 | 536  |
| REACTOME_ADHERENS_JUNCTIONS_INTERACTIONS                                                                                    | 21  | -0.978613 | -1.0381   | 0.55254775  | 1          | 1 | 939  |
| BIOCARTA_TNFR2_PATHWAY                                                                                                      | 17  | -0.992217 | -1.037875 | 0.48765433  | 1          | 1 | 343  |
| REACTOME_METAL_ION_SLC_TRANSPORTERS                                                                                         | 21  | -0.978933 | -1.037564 | 0.56414217  | 1          | 1 | 927  |
| REACTOME_RIP_MEDIATED_NFKB_ACTIVATION_VIA_DAI                                                                               | 17  | -0.994865 | -1.037467 | 0.45679012  | 1          | 1 | 227  |
| REACTOME_SHC1_EVENTS_IN_ERBB4_SIGNALING                                                                                     | 19  | -0.983772 | -1.037409 | 0.53015876  | 1          | 1 | 714  |
| REACTOME_SULFUR_AMINO_ACID_METABOLISM                                                                                       | 23  | -0.964529 | -1.036187 | 0.71770334  | 1          | 1 | 1558 |
| REACTOME_RAP1_SIGNALLING                                                                                                    | 16  | -0.999984 | -1.035918 | 0           | 1          | 1 | 1    |
| KEGG_ASCORBATE_AND_ALDARATE_METABOLISM                                                                                      | 23  | -0.965556 | -1.035145 | 0.7069243   | 1          | 1 | 1512 |
| KEGG_GRAFT_VERSUS_HOST_DISEASE                                                                                              | 19  | -0.976847 | -1.034532 | 0.61001515  | 1          | 1 | 32   |
| REACTOME_MITOCHONDRIAL_TRNA_AMINOACYLATION                                                                                  | 21  | -0.972405 | -1.034424 | 0.6201923   | 1          | 1 | 1211 |
| REACTOME_PROSTACYCLIN_SIGNALLING_THROUGH_PROSTACYCLIN_RECEPTOR                                                              | 19  | -0.986055 | -1.034201 | 0.51339287  | 1          | 1 | 613  |
| REACTOME_ENOS_ACTIVATION_AND_REGULATION                                                                                     | 20  | -0.972474 | -1.033679 | 0.6527778   | 1          | 1 | 1210 |
| REACTOME_RESPIRATORY_ELECTRON_TRANSPORT_ATP_SYNTHESIS_BY_CHEMIOSMOTIC_COUPLING_AND_HEAT_PRODUCTION_BY_UNCOUPLING_PROTEINS   | 69  | -0.812886 | -1.032643 | 0.48653847  | 1          | 1 | 1611 |
| BIOCARTA_PROTEASOME_PATHWAY                                                                                                 | 28  | -0.937308 | -1.032542 | 0.7016129   | 1          | 1 | 1346 |
| KEGG_REGULATION_OF_AUTOPHAGY                                                                                                | 33  | -0.913516 | -1.032481 | 0.64735943  | 1          | 1 | 1341 |
| REACTOME_INSULIN_RECEPTOR_RECYCLING                                                                                         | 22  | -0.962247 | -1.032336 | 0.7693548   | 1          | 1 | 1656 |
| REACTOME_METABOLISM_OF_PROTEINS                                                                                             | 442 | -0.630142 | -1.03086  | 0.37662336  | 1          | 1 | 1336 |
| REACTOME_SHC_RELATED_EVENTS                                                                                                 | 16  | -0.983751 | -1.03072  | 0.5854015   | 1          | 1 | 714  |
| REACTOME_ACETYLCHOLINE_BINDING_AND_DOWNSTREAM_EVENTS                                                                        | 15  | -0.998813 | -1.030455 | 0.48579547  | 1          | 1 | 54   |
| REACTOME_PYRUVATE_METABOLISM                                                                                                | 18  | -0.976469 | -1.029666 | 0.6346749   | 1          | 1 | 1036 |
| BIOCARTA_IL10_PATHWAY                                                                                                       | 17  | -0.987567 | -1.029613 | 0.5319813   | 1          | 1 | 23   |
| REACTOME_NUCLEAR_EVENTS_KINASE_AND_TRANSCRIPTION_FACTOR_ACTIVATION                                                          | 24  | -0.961538 | -1.027937 | 0.7696      | 1          | 1 | 1687 |
| REACTOME_ARMS_MEDIATED_ACTIVATION                                                                                           | 17  | -0.98375  | -1.027245 | 0.5461422   | 1          | 1 | 714  |
| REACTOME_PRE_NOTCH_PROCESSING_IN_GOLGI                                                                                      | 16  | -0.991328 | -1.026855 | 0.5386819   | 1          | 1 | 382  |

|                                                                                                         |     |           |           |            |   |   |      |
|---------------------------------------------------------------------------------------------------------|-----|-----------|-----------|------------|---|---|------|
| REACTOME_ERK_MAPK_TARGETS                                                                               | 21  | -0.96154  | -1.02657  | 0.78971964 | 1 | 1 | 1687 |
| BIOCARTA_CTLA4_PATHWAY                                                                                  | 17  | -0.98423  | -1.02651  | 0.5762463  | 1 | 1 | 47   |
| REACTOME_KINESINS                                                                                       | 24  | -0.963843 | -1.026382 | 0.7447833  | 1 | 1 | 1591 |
| REACTOME_FANCONI_ANEMIA_PATHWAY                                                                         | 20  | -0.969803 | -1.026107 | 0.70542634 | 1 | 1 | 1326 |
| REACTOME_AMINO_ACID_TRANSPORT_ACROSS_THE_PLASMA_MEMBRANE                                                | 31  | -0.913424 | -1.025802 | 0.6566164  | 1 | 1 | 453  |
| KEGG_NICOTINATE_AND_NICOTINAMIDE_METABOLISM                                                             | 22  | -0.967497 | -1.02556  | 0.7092308  | 1 | 1 | 1427 |
| REACTOME_RAS_ACTIVATION_UOPN_CA2_INFUX_THROUGH_NMDA_RECEPTOR                                            | 17  | -0.98407  | -1.025525 | 0.5802469  | 1 | 1 | 700  |
| BIOCARTA_ATRBRCA_PATHWAY                                                                                | 20  | -0.969872 | -1.025331 | 0.70253164 | 1 | 1 | 1326 |
| REACTOME_CREB_PHOSPHORYLATION_THROUGH_THE_ACTIVATION_OF_CAMKII                                          | 15  | -0.984071 | -1.024459 | 0.60795456 | 1 | 1 | 700  |
| BIOCARTA_SPRY_PATHWAY                                                                                   | 18  | -0.973731 | -1.023779 | 0.67261904 | 1 | 1 | 1153 |
| REACTOME_SIGNALING_TO_P38_VIA_RIT_AND_RIN                                                               | 15  | -0.983751 | -1.023338 | 0.6172662  | 1 | 1 | 714  |
| BIOCARTA_MCM_PATHWAY                                                                                    | 18  | -0.966929 | -1.023303 | 0.74558824 | 1 | 1 | 1452 |
| KEGG_ADIPOCYTOKINE_SIGNALING_PATHWAY                                                                    | 66  | -0.806931 | -1.022785 | 0.51459855 | 1 | 1 | 1644 |
| REACTOME_NUCLEOTIDE_BINDING_DOMAIN_LEUCINE_RICH_REPEAT_CONTAINING_RECEPTOR_NLR_SIGNALING_PATHWAYS       | 43  | -0.876039 | -1.020906 | 0.5934066  | 1 | 1 | 946  |
| REACTOME_TELOMERE_MAINTENANCE                                                                           | 75  | -0.802698 | -1.020484 | 0.51498127 | 1 | 1 | 862  |
| BIOCARTA_TALL1_PATHWAY                                                                                  | 15  | -0.984618 | -1.020458 | 0.6091954  | 1 | 1 | 677  |
| REACTOME_DEADENYLATION_OF_MRNA                                                                          | 17  | -0.971746 | -1.020093 | 0.7023644  | 1 | 1 | 1242 |
| REACTOME_SHC_MEDIATED_SIGNALING                                                                         | 15  | -0.983751 | -1.01933  | 0.62154293 | 1 | 1 | 714  |
| BIOCARTA_LAIR_PATHWAY                                                                                   | 16  | -0.977898 | -1.019262 | 0.67127496 | 1 | 1 | 23   |
| REACTOME_INFLAMMASOMES                                                                                  | 16  | -0.978524 | -1.019186 | 0.6622807  | 1 | 1 | 946  |
| REACTOME_INCRETIN_SYNTHESIS_SECRETION_AND_INACTIVATION                                                  | 18  | -0.970079 | -1.017264 | 0.73590505 | 1 | 1 | 1315 |
| REACTOME_SHC1_EVENTS_IN_EGFR_SIGNALING                                                                  | 15  | -0.983751 | -1.017121 | 0.615942   | 1 | 1 | 714  |
| BIOCARTA_TH1TH2_PATHWAY                                                                                 | 17  | -0.964328 | -1.015358 | 0.7966616  | 1 | 1 | 1566 |
| REACTOME_DESTABILIZATION_OF_MRNA_BY_KSRP                                                                | 17  | -0.967706 | -1.014581 | 0.7695652  | 1 | 1 | 1418 |
| KEGG_ASTHMA                                                                                             | 16  | -0.967798 | -1.013773 | 0.77286136 | 1 | 1 | 1413 |
| BIOCARTA_EIF_PATHWAY                                                                                    | 16  | -0.971746 | -1.01372  | 0.729927   | 1 | 1 | 1242 |
| REACTOME_HOMOLOGOUS_RECOMBINATION_REPAIR_OF_REPLICATION_INDEPENDENT_DOUBLE_STRAND_BREAKS                | 15  | -0.979237 | -1.013661 | 0.6897038  | 1 | 1 | 680  |
| REACTOME_CGMP_EFFECTS                                                                                   | 17  | -0.964853 | -1.013659 | 0.7886677  | 1 | 1 | 1542 |
| REACTOME_N_GLYCAN_ANTENNAE_ELONGATION_IN_THE_MEDIAL_TRANS_GOLGI                                         | 17  | -0.969555 | -1.013495 | 0.7394469  | 1 | 1 | 1336 |
| BIOCARTA_CELLCYCLE_PATHWAY                                                                              | 23  | -0.944974 | -1.013446 | 0.7941176  | 1 | 1 | 1509 |
| KEGG_ALLOGRAFT_REJECTION                                                                                | 17  | -0.96782  | -1.013414 | 0.7732733  | 1 | 1 | 1413 |
| KEGG_OOCYTE_MEIOSIS                                                                                     | 108 | -0.739103 | -1.01303  | 0.45383105 | 1 | 1 | 1299 |
| REACTOME_PEPTIDE_LIGAND_BINDING_RECEPTORS                                                               | 162 | -0.690757 | -1.011808 | 0.44636014 | 1 | 1 | 1522 |
| KEGG_TERPENOID_BACKBONE_BIOSYNTHESIS                                                                    | 15  | -0.974988 | -1.011419 | 0.73938507 | 1 | 1 | 1098 |
| REACTOME_GLUCURONIDATION                                                                                | 18  | -0.966222 | -1.011107 | 0.809593   | 1 | 1 | 1482 |
| REACTOME_EARLY_PHASE_OF_HIV_LIFE_CYCLE                                                                  | 15  | -0.971633 | -1.010759 | 0.7373737  | 1 | 1 | 1245 |
| KEGG_RIBOFLAVIN_METABOLISM                                                                              | 15  | -0.97056  | -1.009219 | 0.75637394 | 1 | 1 | 1292 |
| REACTOME_TRANSPORT_OF_INORGANIC_CATIONS_ANIONS_AND_AMINO_ACIDS_OLIGOPEPTIDES                            | 91  | -0.744322 | -1.008175 | 0.4716312  | 1 | 1 | 1585 |
| REACTOME_CYCLIN_A_B1_ASSOCIATED_EVENTS_DURING_G2_M_TRANSITION                                           | 15  | -0.975878 | -1.00785  | 0.7221418  | 1 | 1 | 1062 |
| REACTOME_DESTABILIZATION_OF_MRNA_BY_TRISTETRAPROLIN_TTP                                                 | 17  | -0.967706 | -1.007474 | 0.78549385 | 1 | 1 | 1418 |
| REACTOME_SYNTHESIS_OF_PC                                                                                | 18  | -0.957618 | -1.007428 | 0.851227   | 1 | 1 | 553  |
| REACTOME_DESTABILIZATION_OF_MRNA_BY_BRF1                                                                | 17  | -0.967706 | -1.007047 | 0.7912913  | 1 | 1 | 1418 |
| REACTOME_G0_AND_EARLY_G1                                                                                | 24  | -0.931521 | -1.006398 | 0.78405315 | 1 | 1 | 1247 |
| BIOCARTA_NOZIL12_PATHWAY                                                                                | 17  | -0.964305 | -1.006025 | 0.8192956  | 1 | 1 | 1566 |
| REACTOME_PLATELET_SENSITIZATION_BY_LDL                                                                  | 16  | -0.961545 | -1.004381 | 0.8684211  | 1 | 1 | 1687 |
| REACTOME_SYNTHESIS_SECRETION_AND_INACTIVATION_OF_GLP1                                                   | 15  | -0.970081 | -1.00436  | 0.7710843  | 1 | 1 | 1315 |
| KEGG_CHEMOKINE_SIGNALING_PATHWAY                                                                        | 176 | -0.681206 | -1.004237 | 0.44970414 | 1 | 1 | 1115 |
| BIOCARTA_INFLAM_PATHWAY                                                                                 | 25  | -0.924975 | -1.002439 | 0.7646104  | 1 | 1 | 545  |
| BIOCARTA_HSP27_PATHWAY                                                                                  | 15  | -0.967844 | -1.002184 | 0.81908834 | 1 | 1 | 1413 |
| REACTOME_G1_S_TRANSITION                                                                                | 108 | -0.731256 | -1.001919 | 0.46561885 | 1 | 1 | 1498 |
| KEGG_GLYCOXYLATE_AND_DICARBOXYLATE_METABOLISM                                                           | 16  | -0.966657 | -0.998224 | 0.8340307  | 1 | 1 | 1463 |
| REACTOME_SIGNALING_BY_ILS                                                                               | 104 | -0.733401 | -0.996713 | 0.49704143 | 1 | 1 | 1153 |
| KEGG_JAK_STAT_SIGNALING_PATHWAY                                                                         | 148 | -0.688721 | -0.995569 | 0.47398844 | 1 | 1 | 1566 |
| BIOCARTA_DC_PATHWAY                                                                                     | 22  | -0.925203 | -0.99157  | 0.7993827  | 1 | 1 | 158  |
| REACTOME_LYSOSOME_VESICLE_BIOGENESIS                                                                    | 23  | -0.919102 | -0.990112 | 0.7960725  | 1 | 1 | 966  |
| KEGG_TIGHT_JUNCTION                                                                                     | 127 | -0.691458 | -0.988864 | 0.4785047  | 1 | 1 | 714  |
| REACTOME_PHOSPHORYLATION_OF_THE_APC_C                                                                   | 17  | -0.942827 | -0.986318 | 0.8603269  | 1 | 1 | 153  |
| REACTOME_REGULATION_OF_KIT_SIGNALING                                                                    | 16  | -0.942894 | -0.986035 | 0.8744461  | 1 | 1 | 1153 |
| REACTOME_CITRIC_ACID_CYCLE_TCA_CYCLE                                                                    | 20  | -0.923309 | -0.982983 | 0.8390093  | 1 | 1 | 609  |
| REACTOME_APC_C_CDC20_MEDIATED_DEGRADATION_OF_CYCLIN_B                                                   | 20  | -0.924557 | -0.982173 | 0.8273616  | 1 | 1 | 1173 |
| REACTOME_LATE_PHASE_OF_HIV_LIFE_CYCLE                                                                   | 94  | -0.720912 | -0.979127 | 0.5266055  | 1 | 1 | 1402 |
| REACTOME_HIV_LIFE_CYCLE                                                                                 | 109 | -0.726722 | -0.976693 | 0.5297398  | 1 | 1 | 1402 |
| REACTOME_RECYCLING_PATHWAY_OF_L1                                                                        | 26  | -0.899299 | -0.972991 | 0.7862969  | 1 | 1 | 793  |
| REACTOME_SIGNALING_BY_NODAL                                                                             | 18  | -0.919385 | -0.971562 | 0.8531685  | 1 | 1 | 698  |
| REACTOME_CELL_CYCLE_MITOTIC                                                                             | 304 | -0.615244 | -0.966272 | 0.5248092  | 1 | 1 | 1532 |
| KEGG_GLYCINE_SERINE_AND_THREONINE_METABOLISM                                                            | 31  | -0.868793 | -0.965328 | 0.74655175 | 1 | 1 | 619  |
| KEGG_GLYCOSAMINOGLYCAN_DEGRADATION                                                                      | 20  | -0.917541 | -0.961237 | 0.87253416 | 1 | 1 | 88   |
| BIOCARTA_IL1R_PATHWAY                                                                                   | 33  | -0.857958 | -0.960012 | 0.73275864 | 1 | 1 | 449  |
| BIOCARTA_MTOR_PATHWAY                                                                                   | 23  | -0.897312 | -0.955363 | 0.8401254  | 1 | 1 | 1242 |
| BIOCARTA_STATHMIN_PATHWAY                                                                               | 19  | -0.895536 | -0.950722 | 0.8489666  | 1 | 1 | 153  |
| REACTOME_AMINO_ACID_AND_OLIGOPEPTIDE_SLC_TRANSPORTERS                                                   | 48  | -0.783316 | -0.945492 | 0.64737797 | 1 | 1 | 453  |
| REACTOME_INTERFERON_SIGNALING                                                                           | 142 | -0.656226 | -0.943424 | 0.56037736 | 1 | 1 | 1286 |
| KEGG_TOLL_LIKE_RECEPTOR_SIGNALING_PATHWAY                                                               | 99  | -0.685872 | -0.939534 | 0.58381504 | 1 | 1 | 412  |
| REACTOME_SIGNALING_BY_CONSTITUTIVELY_ACTIVE_EGFR                                                        | 18  | -0.892476 | -0.938794 | 0.8822606  | 1 | 1 | 1153 |
| REACTOME_RECRUITMENT_OF_MITOTIC_CENTROSOME_PROTEINS_AND_COMPLEXES                                       | 63  | -0.751045 | -0.936679 | 0.609901   | 1 | 1 | 1372 |
| REACTOME_NEGATIVE_REGULATORS_OF_RIG_I_MDA5_SIGNALING                                                    | 31  | -0.835068 | -0.932094 | 0.7599309  | 1 | 1 | 617  |
| REACTOME_RNA_POL_II_TRANSCRIPTION                                                                       | 94  | -0.693733 | -0.927653 | 0.62030077 | 1 | 1 | 1444 |
| KEGG_PYRUVATE_METABOLISM                                                                                | 39  | -0.800767 | -0.924855 | 0.7092593  | 1 | 1 | 667  |
| CANCER-TESTIS-ANTIGEN                                                                                   | 164 | -0.635824 | -0.924318 | 0.5864811  | 1 | 1 | 713  |
| REACTOME_APOPTOTIC_EXECUTION_PHASE                                                                      | 50  | -0.762226 | -0.921834 | 0.67192984 | 1 | 1 | 765  |
| REACTOME_BASIGIN_INTERACTIONS                                                                           | 25  | -0.846071 | -0.921287 | 0.81178397 | 1 | 1 | 784  |
| REACTOME_INSULIN_SYNTHESIS_AND_PROCESSING                                                               | 18  | -0.874473 | -0.920062 | 0.8842593  | 1 | 1 | 927  |
| REACTOME_APC_CDC20_MEDIATED_DEGRADATION_OF_NEK2A                                                        | 22  | -0.858184 | -0.919186 | 0.84294873 | 1 | 1 | 1173 |
| REACTOME_IL_2_SIGNALING                                                                                 | 41  | -0.78151  | -0.909839 | 0.7209302  | 1 | 1 | 714  |
| KEGG_EPITHELIAL_CELL_SIGNALING_IN_HELICOBACTER_PYLORI_INFECTION                                         | 66  | -0.712406 | -0.905881 | 0.64480877 | 1 | 1 | 615  |
| KEGG_NATURAL_KILLER_CELL_MEDIATED_CYTOTOXICITY                                                          | 122 | -0.638082 | -0.904298 | 0.6184211  | 1 | 1 | 1464 |
| REACTOME_TGF_BETA_RECEPTOR_SIGNALING_ACTIVATES_SMADS                                                    | 25  | -0.834523 | -0.903397 | 0.83623695 | 1 | 1 | 656  |
| REACTOME_ASSOCIATION_OF_TRIC_CCT_WITH_TARGET_PROTEINS_DURING_BIOSYNTHESIS                               | 26  | -0.828922 | -0.902554 | 0.8237288  | 1 | 1 | 1291 |
| KEGG_PROGESTERONE_MEDIATED_OOCYTE_MATURATION                                                            | 82  | -0.687763 | -0.900389 | 0.6397059  | 1 | 1 | 1115 |
| REACTOME_SIGNALING_BY_THE_B_CELL_RECEPTOR_BCR                                                           | 122 | -0.637679 | -0.8979   | 0.6221374  | 1 | 1 | 1498 |
| REACTOME_CLASS_A1_RHODOPSIN_LIKE_RECEPTORS                                                              | 269 | -0.568383 | -0.897363 | 0.6360153  | 1 | 1 | 1522 |
| REACTOME_THROMBIN_SIGNALING_THROUGH_PROTEINASE_ACTIVATED_RECEPTORS_PARS                                 | 30  | -0.814348 | -0.897314 | 0.7958478  | 1 | 1 | 613  |
| REACTOME_CTNNB1_PHOSPHORYLATION_CASCADE                                                                 | 15  | -0.860186 | -0.89209  | 0.9251412  | 1 | 1 | 675  |
| KEGG_CELL_ADHESION_MOLECULES_CAMS                                                                       | 105 | -0.647238 | -0.890125 | 0.65346533 | 1 | 1 | 1464 |
| REACTOME_DOWNREGULATION_OF_TGF_BETA_RECEPTOR_SIGNALING                                                  | 22  | -0.834524 | -0.889284 | 0.87741935 | 1 | 1 | 656  |
| REACTOME_SIGNALING_BY_SCF_KIT                                                                           | 74  | -0.681661 | -0.888998 | 0.649635   | 1 | 1 | 1153 |
| REACTOME_PERK_REGULATED_GENE_EXPRESSION                                                                 | 27  | -0.812484 | -0.887594 | 0.8289703  | 1 | 1 | 106  |
| KEGG_MTOR_SIGNALING_PATHWAY                                                                             | 48  | -0.741086 | -0.887141 | 0.69299823 | 1 | 1 | 1242 |
| REACTOME_NEF_MEDIATES_DOWN_MODULATION_OF_CELL_SURFACE_RECEPTORS_BY_RECRUITING_THEM_TO_CLATHRIN_ADAPTERS | 18  | -0.843055 | -0.885876 | 0.89209723 | 1 | 1 | 47   |
| REACTOME_ACTIVATION_OF_GENES_BY_ATF4                                                                    | 24  | -0.812485 | -0.880129 | 0.83686787 | 1 | 1 | 106  |
| REACTOME_DNA_REPLICATION                                                                                | 182 | -0.59802  | -0.878126 | 0.67611337 | 1 | 1 | 1617 |
| REACTOME_MITOTIC_M_M_G1_PHASES                                                                          | 162 | -0.603085 | -0.877434 | 0.68725866 | 1 | 1 | 1617 |
| BIOCARTA_NTH1_PATHWAY                                                                                   | 23  | -0.80822  | -0.872392 | 0.8519737  | 1 | 1 | 32   |
| KEGG_MAPK_SIGNALING_PATHWAY                                                                             | 254 | -0.56945  | -0.871542 | 0.71146244 | 1 | 1 | 1213 |
| KEGG_HOMOLOGOUS_RECOMBINATION                                                                           | 26  | -0.805169 | -0.870577 | 0.8471761  | 1 | 1 | 128  |
| REACTOME_TCR_SIGNALING                                                                                  | 43  | -0.753119 | -0.870258 | 0.77459747 | 1 | 1 | 47   |
| BIOCARTA_P38MAPK_PATHWAY                                                                                | 39  | -0.744559 | -0.868279 | 0.7513612  | 1 | 1 | 343  |
| REACTOME_NEUROTRANSMITTER_RECEPTOR_BINDING_AND_DOWNSTREAM_TRANSMISSION_IN_THE_POSTSYNAPTIC_CELL         | 132 | -0.61511  | -0.86736  | 0.72038835 | 1 | 1 | 1238 |

|                                                                                                                                       |     |           |           |            |            |   |      |
|---------------------------------------------------------------------------------------------------------------------------------------|-----|-----------|-----------|------------|------------|---|------|
| REACTOME_THE_ROLE_OF_NEF_IN_HIV1_REPLICATION_AND_DISEASE_PATHOGENESIS                                                                 | 24  | -0.797906 | -0.866489 | 0.8416     | 1          | 1 | 47   |
| REACTOME_INHIBITION_OF_THE_PROTEOLYTIC_ACTIVITY_OF_APC_C_REQUIRED_FOR_THE_ONSET_OF_ANAPHAS E_BY_MITOTIC_SPINDLE_CHECKPOINT_COMPONENTS | 18  | -0.814612 | -0.860781 | 0.8913044  | 1          | 1 | 1173 |
| REACTOME_REGULATION_OF_BETA_CELL_DEVELOPMENT                                                                                          | 26  | -0.792611 | -0.860273 | 0.8453427  | 1          | 1 | 1388 |
| REACTOME_DNA_REPAIR                                                                                                                   | 102 | -0.624709 | -0.857582 | 0.6990476  | 1          | 1 | 1326 |
| KEGG_RNA_POLYMERASE                                                                                                                   | 29  | -0.787643 | -0.857357 | 0.8496622  | 1          | 1 | 186  |
| REACTOME_TRANS_GOLGI_NETWORK_VESICLE_BUDDING                                                                                          | 57  | -0.69469  | -0.854874 | 0.7134935  | 1          | 1 | 966  |
| REACTOME_METABOLISM_OF_AMINO_ACIDS_AND_DERIVATIVES                                                                                    | 187 | -0.567174 | -0.850018 | 0.7607843  | 1          | 1 | 1575 |
| KEGG_LEISHMANIA_INFECTION                                                                                                             | 58  | -0.691115 | -0.844407 | 0.729927   | 1          | 1 | 482  |
| KEGG_NEUROTROPHIN_SIGNALING_PATHWAY                                                                                                   | 122 | -0.597836 | -0.839414 | 0.7252337  | 1          | 1 | 1072 |
| REACTOME_GLYCOLYSIS                                                                                                                   | 27  | -0.760125 | -0.836177 | 0.8322259  | 1          | 1 | 1222 |
| REACTOME_COSTIMULATION_BY_THE_CD28_FAMILY                                                                                             | 55  | -0.691775 | -0.831782 | 0.75189394 | 1          | 1 | 615  |
| REACTOME_DOWNSTREAM_TCR_SIGNALING                                                                                                     | 27  | -0.753329 | -0.828799 | 0.8476821  | 1          | 1 | 47   |
| KEGG_RETINOL_METABOLISM                                                                                                               | 57  | -0.653935 | -0.827264 | 0.7383721  | 1          | 1 | 1482 |
| BIOCARTA_IL7_PATHWAY                                                                                                                  | 16  | -0.79     | -0.822385 | 0.93519884 | 1          | 1 | 545  |
| REACTOME_ANTIGEN_PROCESSING_CROSS_PRESENTATION                                                                                        | 68  | -0.648722 | -0.821279 | 0.7485605  | 1          | 1 | 1498 |
| KEGG_SPHINGOLIPID_METABOLISM                                                                                                          | 36  | -0.714304 | -0.81494  | 0.8128342  | 1          | 1 | 1291 |
| BIOCARTA_EIF4_PATHWAY                                                                                                                 | 24  | -0.750293 | -0.814439 | 0.8536978  | 1          | 1 | 1242 |
| REACTOME_IL1_SIGNALING                                                                                                                | 38  | -0.71261  | -0.814341 | 0.8264015  | 1          | 1 | 449  |
| REACTOME_METABOLISM_OF_CARBOHYDRATES                                                                                                  | 232 | -0.522783 | -0.811995 | 0.81764704 | 1          | 1 | 1287 |
| KEGG_SPLICEOSOME                                                                                                                      | 123 | -0.574002 | -0.804784 | 0.7868217  | 1          | 1 | 1553 |
| KEGG_LONG_TERM_POTENTIATION                                                                                                           | 66  | -0.63437  | -0.804067 | 0.7509434  | 1          | 1 | 714  |
| KEGG_NEUROACTIVE_LIGAND_RECEPTOR_INTERACTION                                                                                          | 258 | -0.516285 | -0.803719 | 0.83514494 | 1          | 1 | 1116 |
| REACTOME_G_ALPHA_Z_SIGNALING_EVENTS                                                                                                   | 43  | -0.682335 | -0.80081  | 0.7935606  | 1          | 1 | 1115 |
| BIOCARTA_CSK_PATHWAY                                                                                                                  | 20  | -0.755    | -0.797696 | 0.9296875  | 1          | 1 | 47   |
| KEGG_CARDIAC_MUSCLE_CONTRACTION                                                                                                       | 70  | -0.62462  | -0.795503 | 0.78368795 | 1          | 1 | 1167 |
| REACTOME_AMINE_COMPOUND_SLC_TRANSPORTERS                                                                                              | 27  | -0.725356 | -0.795246 | 0.85714287 | 1          | 1 | 553  |
| REACTOME_SIGNALING_BY_FGFR_MUTANTS                                                                                                    | 40  | -0.683709 | -0.792318 | 0.8271605  | 1          | 1 | 1152 |
| KEGG_GLYCOSYLPHOSPHATIDYLINOSITOL_GPI_ANCHOR_BIOSYNTHESIS                                                                             | 25  | -0.725077 | -0.783783 | 0.885274   | 1          | 1 | 981  |
| BIOCARTA_NKCELLS_PATHWAY                                                                                                              | 19  | -0.738868 | -0.781884 | 0.9253049  | 1          | 1 | 812  |
| REACTOME_CD28_CO_STIMULATION                                                                                                          | 31  | -0.698117 | -0.779156 | 0.86243385 | 1          | 1 | 615  |
| REACTOME_UNFOLDED_PROTEIN_RESPONSE                                                                                                    | 75  | -0.603975 | -0.779149 | 0.8098859  | 1          | 1 | 1657 |
| REACTOME_SIGNALING_BY_FGFR1_FUSION_MUTANTS                                                                                            | 18  | -0.742135 | -0.778057 | 0.94356006 | 1          | 1 | 1152 |
| REACTOME_ION_CHANNEL_TRANSPORT                                                                                                        | 83  | -0.642717 | -0.776743 | 0.798675   | 1          | 1 | 1249 |
| KEGG_SMALL_CELL_LUNG_CANCER                                                                                                           | 51  | -0.597632 | -0.775841 | 0.798419   | 1          | 1 | 482  |
| BIOCARTA_CARM_ER_PATHWAY                                                                                                              | 35  | -0.681895 | -0.771926 | 0.83652174 | 1          | 1 | 1247 |
| KEGG_DRUG_METABOLISM_OTHER_ENZYMES                                                                                                    | 47  | -0.647934 | -0.770553 | 0.81609195 | 1          | 1 | 1000 |
| REACTOME_GROWTH_HORMONE_RECEPTOR_SIGNALING                                                                                            | 24  | -0.712471 | -0.767953 | 0.8955224  | 1          | 1 | 615  |
| REACTOME_FACTORS_INVOLVED_IN_MEGAKARYOCYTE_DEVELOPMENT_AND_PLATELET_PRODUCTION                                                        | 128 | -0.539013 | -0.766256 | 0.8593156  | 1          | 1 | 1503 |
| REACTOME_PI3K_EVENTS_IN_ERBB4_SIGNALING                                                                                               | 35  | -0.679331 | -0.761979 | 0.879646   | 1          | 1 | 202  |
| REACTOME_CD28_DEPENDENT_PI3K_AKT_SIGNALING                                                                                            | 21  | -0.716119 | -0.761404 | 0.91935486 | 1          | 1 | 47   |
| KEGG_PEROXISOME                                                                                                                       | 78  | -0.587109 | -0.76089  | 0.8181818  | 1          | 1 | 1121 |
| BIOCARTA_MAL_PATHWAY                                                                                                                  | 18  | -0.719274 | -0.757287 | 0.9375     | 1          | 1 | 500  |
| REACTOME_CHOLESTEROL_BIOSYNTHESIS                                                                                                     | 21  | -0.715355 | -0.753668 | 0.92987806 | 1          | 1 | 1264 |
| REACTOME_LIPID_DIGESTION_MOBILIZATION_AND_TRANSPORT                                                                                   | 40  | -0.64671  | -0.752129 | 0.83893806 | 1          | 1 | 784  |
| REACTOME_FRS2_MEDIATED_CASCADE                                                                                                        | 33  | -0.672004 | -0.751719 | 0.8687392  | 1          | 1 | 714  |
| REACTOME_INNATE_IMMUNE_SYSTEM                                                                                                         | 253 | -0.494692 | -0.748954 | 0.93495935 | 1          | 1 | 946  |
| KEGG_GLYCEROPHOSPHOLIPID_METABOLISM                                                                                                   | 67  | -0.591615 | -0.748113 | 0.8509804  | 1          | 1 | 1136 |
| REACTOME_LOSS_OF_NLP_FROM_MITOTIC_CENTROSOMES                                                                                         | 56  | -0.599289 | -0.746851 | 0.84826326 | 1          | 1 | 1372 |
| KEGG_PYRIMIDINE_METABOLISM                                                                                                            | 95  | -0.548067 | -0.739831 | 0.8593156  | 1          | 1 | 1427 |
| BIOCARTA_TNFR1_PATHWAY                                                                                                                | 29  | -0.669891 | -0.735232 | 0.9134126  | 1          | 1 | 1413 |
| REACTOME_GABA_RECEPTOR_ACTIVATION                                                                                                     | 50  | -0.602281 | -0.73204  | 0.8374291  | 1          | 1 | 1115 |
| REACTOME_SHC_MEDIATED_CASCADE                                                                                                         | 25  | -0.672007 | -0.730005 | 0.9081803  | 1          | 1 | 714  |
| REACTOME_A_TETRASACCHARIDE_LINKER_SEQUENCE_IS_REQUIRED_FOR_GAG_SYNTHESIS                                                              | 24  | -0.671256 | -0.729514 | 0.9104     | 1          | 1 | 1287 |
| KEGG_ALDOSTERONE_REGULATED_SODIUM_REABSORPTION                                                                                        | 38  | -0.639115 | -0.7293   | 0.8813869  | 1          | 1 | 1066 |
| KEGG_BLADDER_CANCER                                                                                                                   | 39  | -0.632899 | -0.729065 | 0.88       | 1          | 1 | 822  |
| KEGG_ANTIGEN_PROCESSING_AND_PRESENTATION                                                                                              | 61  | -0.579318 | -0.719777 | 0.90185183 | 1          | 1 | 966  |
| REACTOME_NA_CL_DEPENDENT_NEUROTRANSMITTER_TRANSPORTERS                                                                                | 17  | -0.683894 | -0.713518 | 0.9519651  | 1          | 1 | 453  |
| REACTOME_PKB_MEDIATED_EVENTS                                                                                                          | 27  | -0.648649 | -0.71316  | 0.90084034 | 1          | 1 | 1242 |
| REACTOME_CELL_SURFACE_INTERACTIONS_AT_THE_VASCULAR_WALL                                                                               | 83  | -0.537481 | -0.708504 | 0.91698843 | 1          | 1 | 784  |
| REACTOME_ACTIVATED_AMPK_STIMULATES_FATTY_ACID_OXIDATION_IN_MUSCLE                                                                     | 17  | -0.675806 | -0.707584 | 0.95224315 | 1          | 1 | 660  |
| REACTOME_RIG_1_MDA5_MEDIATED_INDUCION_OF_IFN_ALPHA_BETA_PATHWAYS                                                                      | 71  | -0.559646 | -0.706134 | 0.8897196  | 1          | 1 | 617  |
| REACTOME_IL_3_5_AND_GM-CSF_SIGNALING                                                                                                  | 42  | -0.60709  | -0.705159 | 0.8863233  | 1          | 1 | 1153 |
| REACTOME_SIGNALING_BY_ROBO_RECEPTOR                                                                                                   | 27  | -0.645036 | -0.702923 | 0.91137123 | 1          | 1 | 98   |
| BIOCARTA_GSK3_PATHWAY                                                                                                                 | 27  | -0.642029 | -0.699752 | 0.91797554 | 1          | 1 | 412  |
| REACTOME_APOPTOTIC_CLEAVAGE_OF_CELLULAR_PROTEINS                                                                                      | 36  | -0.588616 | -0.6801   | 0.88729876 | 1          | 1 | 727  |
| REACTOME_GLUCAGON_SIGNALING_IN_METABOLIC_REGULATION                                                                                   | 32  | -0.607457 | -0.677008 | 0.92413795 | 1          | 1 | 1115 |
| KEGG_INSULIN_SIGNALING_PATHWAY                                                                                                        | 133 | -0.476293 | -0.670337 | 0.994      | 1          | 1 | 1242 |
| KEGG_VIRAL_MYOCARDITIS                                                                                                                | 50  | -0.548646 | -0.666183 | 0.9259259  | 1          | 1 | 1464 |
| REACTOME_GRB2_EVENTS_IN_ERBB2_SIGNALING                                                                                               | 21  | -0.627814 | -0.66405  | 0.9512579  | 1          | 1 | 714  |
| REACTOME_SIGNAL_TRANSDUCTION_BY_L1                                                                                                    | 34  | -0.580904 | -0.661444 | 0.91296625 | 1          | 1 | 63   |
| KEGG_GNRH_SIGNALING_PATHWAY                                                                                                           | 96  | -0.488497 | -0.659222 | 0.97096187 | 1          | 1 | 1115 |
| BIOCARTA_FAS_PATHWAY                                                                                                                  | 30  | -0.598021 | -0.656909 | 0.95238096 | 1          | 1 | 1195 |
| REACTOME_SIGNALING_BY_FGFR1_MUTANTS                                                                                                   | 28  | -0.597628 | -0.656559 | 0.93634844 | 1          | 1 | 1152 |
| KEGG_GLYCOSAMINOGLYCAN_BIOSYNTHESIS_CHONDROITIN_SULFATE                                                                               | 22  | -0.60471  | -0.6533   | 0.9424     | 1          | 1 | 124  |
| REACTOME_CONVERSION_FROM_APC_C_CD20_TO_APC_C_CDH1_IN_LATE_ANAPHASE                                                                    | 16  | -0.629027 | -0.650434 | 0.9790732  | 1          | 1 | 1173 |
| REACTOME_NOD1_2_SIGNALING_PATHWAY                                                                                                     | 28  | -0.585904 | -0.643093 | 0.93771046 | 1          | 1 | 412  |
| REACTOME_GLYCEROPHOSPHOLIPID_BIOSYNTHESIS                                                                                             | 75  | -0.496106 | -0.642965 | 0.9609375  | 1          | 1 | 1136 |
| REACTOME_FATTY_ACYL_COA_BIOSYNTHESIS                                                                                                  | 18  | -0.612985 | -0.641004 | 0.96390975 | 1          | 1 | 1121 |
| REACTOME_SMAD2_SMAD3_SMAD4_HETEROTRIMER_REGULATES_TRANSCRIPTION                                                                       | 26  | -0.582123 | -0.637641 | 0.9479866  | 1          | 1 | 1247 |
| REACTOME_TAK1_ACTIVATES_NFKB_BY_PHOSPHORYLATION_AND_ACTIVATION_OF_IKKK_COMPLEX                                                        | 22  | -0.585905 | -0.636503 | 0.9328969  | 1          | 1 | 412  |
| REACTOME_CHONDROITIN_SULFATE_DERMATAN_SULFATE_METABOLISM                                                                              | 46  | -0.534614 | -0.634052 | 0.9508772  | 1          | 1 | 124  |
| REACTOME_ENERGY_DEPENDENT_REGULATION_OF_MTOR_BY_LKB1_AMPK                                                                             | 16  | -0.602106 | -0.628349 | 0.97771174 | 1          | 1 | 660  |
| KEGG_PANCREATIC_CANCER                                                                                                                | 67  | -0.496027 | -0.627305 | 0.9834559  | 1          | 1 | 1096 |
| KEGG_PATHOGENIC_ESCHERICHIA_COLI_INFECTION                                                                                            | 56  | -0.517754 | -0.6201   | 0.964486   | 1          | 1 | 915  |
| REACTOME_ACTIVATED_TAK1_MEDIATES_P38_MAPK_ACTIVATION                                                                                  | 17  | -0.585907 | -0.615338 | 0.97337276 | 1          | 1 | 412  |
| REACTOME_POST_TRANSLATIONAL_MODIFICATION_SYNTHESIS_OF_GPI_ANCHORED_PROTEINS                                                           | 26  | -0.561153 | -0.612545 | 0.95408165 | 1          | 1 | 981  |
| KEGG_GLYCOSAMINOGLYCAN_BIOSYNTHESIS_HEPARAN_SULFATE                                                                                   | 26  | -0.559318 | -0.61194  | 0.9629005  | 1          | 1 | 693  |
| REACTOME_JNK_C_JUN_KINASES_PHOSPHORYLATION_AND_ACTIVATION_MEDIATED_BY_ACTIVATED_HUMAN_TA K1                                           | 16  | -0.585907 | -0.611676 | 0.9775112  | 1          | 1 | 412  |
| BIOCARTA_NFAT_PATHWAY                                                                                                                 | 51  | -0.500462 | -0.611049 | 0.9810964  | 1          | 1 | 675  |
| REACTOME_O_LINKED_GLYCOSYLATION_OF_MUCINS                                                                                             | 47  | -0.50743  | -0.610144 | 0.96045196 | 1          | 1 | 776  |
| REACTOME_LIPOPROTEIN_METABOLISM                                                                                                       | 24  | -0.559792 | -0.603461 | 0.965625   | 1          | 1 | 429  |
| BIOCARTA_GCR_PATHWAY                                                                                                                  | 19  | -0.568246 | -0.60326  | 0.969651   | 1          | 1 | 1393 |
| KEGG_TYROSINE_METABOLISM                                                                                                              | 34  | -0.527049 | -0.596639 | 0.96466434 | 1          | 1 | 1399 |
| REACTOME_ACTIVATED_NOTCH1_TRANSMITS_SIGNAL_TO_THE_NUCLEUS                                                                             | 26  | -0.547978 | -0.596261 | 0.9650582  | 1          | 1 | 971  |
| REACTOME_TERMINATION_OF_O_GLYCAN_BIOSYNTHESIS                                                                                         | 18  | -0.563401 | -0.589287 | 0.98275864 | 1          | 1 | 776  |
| REACTOME_NUCLEAR_SIGNALING_BY_ERBB4                                                                                                   | 36  | -0.520543 | -0.587878 | 0.9678571  | 1          | 1 | 202  |
| KEGG_BASE_EXCISION_REPAIR                                                                                                             | 34  | -0.523273 | -0.585933 | 0.98109967 | 1          | 1 | 215  |
| REACTOME_E2F_MEDIATED_REGULATION_OF_DNA_REPLICATION                                                                                   | 34  | -0.518298 | -0.585327 | 0.97861844 | 1          | 1 | 1125 |
| REACTOME_CHONDROITIN_SULFATE_BIOSYNTHESIS                                                                                             | 18  | -0.55427  | -0.583039 | 0.97720367 | 1          | 1 | 74   |
| KEGG_BASAL_TRANSCRIPTION_FACTORS                                                                                                      | 34  | -0.511515 | -0.58245  | 0.9711375  | 1          | 1 | 1039 |
| REACTOME_CROSS_PRESENTATION_OF_SOLUBLE_EXOGENOUS_ANTIGENS_ENDOSOMES                                                                   | 47  | -0.489516 | -0.576699 | 0.9911119  | 1          | 1 | 1498 |
| REACTOME_EXTENSION_OF_TELOMERES                                                                                                       | 27  | -0.529226 | -0.576037 | 0.9821718  | 1          | 1 | 862  |
| REACTOME_IL_RECEPTOR_SHC_SIGNALING                                                                                                    | 27  | -0.521274 | -0.574516 | 0.97875816 | 1          | 1 | 158  |
| REACTOME_GAP_JUNCTION_TRAFFICKING                                                                                                     | 26  | -0.498066 | -0.544151 | 0.9897084  | 1          | 1 | 1364 |
| BIOCARTA_NO1_PATHWAY                                                                                                                  | 30  | -0.481325 | -0.537516 | 0.9982456  | 1          | 1 | 784  |
| BIOCARTA_IL2_PATHWAY                                                                                                                  | 22  | -0.50354  | -0.536006 | 0.9968799  | 1          | 1 | 47   |
| REACTOME_G1_PHASE                                                                                                                     | 36  | -0.468986 | -0.535083 | 1          | 1          | 1 | 1687 |
| KEGG_STEROID_BIOSYNTHESIS                                                                                                             | 16  | -0.506189 | -0.527849 | 0.9941349  | 1          | 1 | 1264 |
| REACTOME_TRAFFICKING_OF_AMPA_RECEPTORS                                                                                                | 26  | -0.478185 | -0.518583 | 1          | 1          | 1 | 1238 |
| BIOCARTA_TID_PATHWAY                                                                                                                  | 19  | -0.485499 | -0.512902 | 0.9984375  | 0.99940956 | 1 | 1413 |

Table S23

GSEA Analysis (Hallmark gene sets) on TCGA HNSC comparing tumors with or without 9p loss, Pathways Depleted

| NAME                                       | SIZE | ES        | NES       | NOM p-value | FDR q-value | FWER p-value | RANK AT MAX |
|--------------------------------------------|------|-----------|-----------|-------------|-------------|--------------|-------------|
| HALLMARK_INTERFERON_GAMMA_RESPONSE         | 190  | -0.855109 | -2.744375 | 0           | 0           | 0            | 1317        |
| HALLMARK_ALLOGRAFT_REJECTION               | 183  | -0.829341 | -2.623169 | 0           | 0           | 0            | 1005        |
| HALLMARK_INTERFERON_ALPHA_RESPONSE         | 91   | -0.885347 | -2.578858 | 0           | 0           | 0            | 1809        |
| HALLMARK_COMPLEMENT                        | 195  | -0.728917 | -2.34002  | 0           | 0           | 0            | 1959        |
| HALLMARK_INFLAMMATORY_RESPONSE             | 197  | -0.730056 | -2.338272 | 0           | 0           | 0            | 2367        |
| HALLMARK_IL6_JAK_STAT3_SIGNALING           | 87   | -0.731323 | -2.160054 | 0           | 0           | 0            | 2179        |
| HALLMARK_IL2_STATS_SIGNALING               | 194  | -0.637947 | -2.066072 | 0           | 0           | 0            | 2951        |
| HALLMARK_KRAS_SIGNALING_UP                 | 193  | -0.614807 | -1.950687 | 0           | 0           | 0            | 2401        |
| HALLMARK_TNFA_SIGNALING_VIA_NFKB           | 197  | -0.606805 | -1.941103 | 0           | 0           | 0            | 2922        |
| HALLMARK_APOPTOSIS                         | 158  | -0.534577 | -1.670234 | 0           | 0.002546372 | 0.025        | 1413        |
| HALLMARK_MYOGENESIS                        | 198  | -0.487981 | -1.572575 | 0.001265823 | 0.011794602 | 0.118        | 4426        |
| HALLMARK_COAGULATION                       | 136  | -0.498312 | -1.516129 | 0.001408451 | 0.019545117 | 0.212        | 2535        |
| HALLMARK_APICAL_SURFACE                    | 43   | -0.554415 | -1.448977 | 0.03301887  | 0.038945436 | 0.405        | 2694        |
| HALLMARK_PI3K_AKT_MTOR_SIGNALING           | 103  | -0.485388 | -1.440448 | 0.015625    | 0.040478278 | 0.438        | 3797        |
| HALLMARK_APICAL_JUNCTION                   | 194  | -0.415006 | -1.332427 | 0.030612245 | 0.11372461  | 0.825        | 4265        |
| HALLMARK_EPITHELIAL_MESENCHYMAL_TRANSITION | 194  | -0.39935  | -1.285401 | 0.04935065  | 0.16172253  | 0.934        | 4265        |
| HALLMARK_P53_PATHWAY                       | 190  | -0.402605 | -1.283451 | 0.037958115 | 0.15477194  | 0.94         | 2794        |
| HALLMARK_TGF_BETA_SIGNALING                | 54   | -0.436768 | -1.188955 | 0.19809826  | 0.31416717  | 1            | 3796        |
| HALLMARK_REACTIVE_OXYGEN_SPECIES_PATHWAY   | 45   | -0.437367 | -1.164183 | 0.2257525   | 0.35447887  | 1            | 3287        |
| HALLMARK_ANDROGEN_RESPONSE                 | 95   | -0.393577 | -1.158838 | 0.18785311  | 0.3485101   | 1            | 3475        |
| HALLMARK_UV_RESPONSE_DN                    | 137  | -0.363454 | -1.124269 | 0.26287264  | 0.41170365  | 1            | 3416        |
| HALLMARK_XENOBIOTIC_METABOLISM             | 197  | -0.334834 | -1.068999 | 0.33462533  | 0.5457384   | 1            | 2441        |
| HALLMARK_KRAS_SIGNALING_DN                 | 183  | -0.337534 | -1.067487 | 0.3126649   | 0.5262501   | 1            | 2808        |
| HALLMARK_HEME_METABOLISM                   | 188  | -0.316462 | -1.016585 | 0.44530246  | 0.6528651   | 1            | 2828        |
| HALLMARK_UV_RESPONSE_UP                    | 150  | -0.327607 | -1.01619  | 0.4238683   | 0.62860024  | 1            | 3125        |
| HALLMARK_ESTROGEN_RESPONSE_EARLY           | 191  | -0.307421 | -0.98401  | 0.47556144  | 0.70073336  | 1            | 2680        |
| HALLMARK_HYPOXIA                           | 190  | -0.293301 | -0.93711  | 0.6111111   | 0.8168293   | 1            | 4039        |
| HALLMARK_ANGIOGENESIS                      | 36   | -0.36884  | -0.933068 | 0.5620915   | 0.79852504  | 1            | 4928        |
| HALLMARK_NOTCH_SIGNALING                   | 32   | -0.368209 | -0.924665 | 0.56053066  | 0.7947106   | 1            | 3159        |
| HALLMARK_BILE_ACID_METABOLISM              | 112  | -0.293459 | -0.882431 | 0.7089136   | 0.88307863  | 1            | 3156        |
| HALLMARK_CHOLESTEROL_HOMEOSTASIS           | 72   | -0.29527  | -0.85229  | 0.72534144  | 0.9208138   | 1            | 2694        |
| HALLMARK_PROTEIN_SECRETION                 | 95   | -0.281959 | -0.834622 | 0.7886473   | 0.9438062   | 1            | 1561        |
| HALLMARK_HEDGEHOG_SIGNALING                | 34   | -0.320207 | -0.817857 | 0.75166667  | 0.9504564   | 1            | 1814        |
| HALLMARK_FATTY_ACID_METABOLISM             | 154  | -0.259991 | -0.81369  | 0.87109905  | 0.93067247  | 1            | 2202        |
| HALLMARK_PEROXISOME                        | 101  | -0.265368 | -0.792086 | 0.8718704   | 0.9426724   | 1            | 2725        |
| HALLMARK_ESTROGEN_RESPONSE_LATE            | 195  | -0.237139 | -0.759483 | 0.9711286   | 0.9605489   | 1            | 3811        |
| HALLMARK_MITOTIC_SPINDLE                   | 196  | -0.206286 | -0.651896 | 0.9987097   | 0.99242125  | 1            | 3740        |

Table S24

GSEA Analysis (Hallmark gene sets) on HNSC cancer cell lines comparing cell lines with or without 9p loss, Pathways Depleted

| NAME                                       | SIZE | ES        | NES       | NOM p-value | FDR q-value | FWER p-value | RANK AT MAX | LEADING EDGE            |
|--------------------------------------------|------|-----------|-----------|-------------|-------------|--------------|-------------|-------------------------|
| HALLMARK_TNFA_SIGNALING_VIA_NFKB           | 198  | -0.619899 | -2.170048 | 0           | 0           | 0            | 4069        | tags=42%, list=15%, sig |
| HALLMARK_COAGULATION                       | 124  | -0.590234 | -1.9757   | 0           | 0           | 0            | 4463        | tags=34%, list=17%, sig |
| HALLMARK_INFLAMMATORY_RESPONSE             | 193  | -0.571366 | -1.974279 | 0           | 0           | 0            | 3097        | tags=30%, list=12%, sig |
| HALLMARK_EPITHELIAL_MESENCHYMAL_TRANSITION | 198  | -0.534657 | -1.860491 | 0           | 2.16E-04    | 0.001        | 1844        | tags=17%, list=7%, sign |
| HALLMARK_KRAS_SIGNALING_UP                 | 187  | -0.519257 | -1.795184 | 0           | 9.94E-04    | 0.005        | 3604        | tags=28%, list=14%, sig |
| HALLMARK_ANGIOGENESIS                      | 33   | -0.656333 | -1.75946  | 0.00501672  | 0.0023008   | 0.014        | 2975        | tags=33%, list=11%, sig |
| HALLMARK_IL6_JAK_STAT3_SIGNALING           | 84   | -0.544827 | -1.711052 | 0.00150602  | 0.00354771  | 0.026        | 3605        | tags=38%, list=14%, sig |
| HALLMARK_UV_RESPONSE_DN                    | 142  | -0.510999 | -1.710883 | 0           | 0.00310424  | 0.026        | 7022        | tags=43%, list=27%, sig |
| HALLMARK_APOPTOSIS                         | 158  | -0.48388  | -1.654786 | 0           | 0.00628327  | 0.057        | 5767        | tags=36%, list=22%, sig |
| HALLMARK_INTERFERON_GAMMA_RESPONSE         | 188  | -0.471526 | -1.63304  | 0           | 0.00712844  | 0.073        | 2406        | tags=19%, list=9%, sign |
| HALLMARK_ALLOGRAFT_REJECTION               | 162  | -0.464622 | -1.580121 | 0.00282087  | 0.01053302  | 0.116        | 3066        | tags=21%, list=12%, sig |
| HALLMARK_IL2_STAT5_SIGNALING               | 192  | -0.445174 | -1.541696 | 0.002849    | 0.0151668   | 0.168        | 3882        | tags=24%, list=15%, sig |
| HALLMARK_COMPLEMENT                        | 188  | -0.420759 | -1.447641 | 0.00278164  | 0.03660318  | 0.388        | 5168        | tags=30%, list=20%, sig |
| HALLMARK_P53_PATHWAY                       | 196  | -0.397632 | -1.380204 | 0.01081081  | 0.06433246  | 0.621        | 3456        | tags=20%, list=13%, sig |
| HALLMARK_MYOGENESIS                        | 183  | -0.394919 | -1.36761  | 0.01969058  | 0.06886461  | 0.662        | 2498        | tags=18%, list=9%, sign |
| HALLMARK_CHOLESTEROL_HOMEOSTASIS           | 72   | -0.44087  | -1.346827 | 0.06026059  | 0.07996611  | 0.733        | 2866        | tags=18%, list=11%, sig |
| HALLMARK_APICAL_SURFACE                    | 43   | -0.465589 | -1.286086 | 0.11575563  | 0.13013865  | 0.901        | 4443        | tags=30%, list=17%, sig |
| HALLMARK_HYPOXIA                           | 193  | -0.366242 | -1.275969 | 0.0455192   | 0.13387458  | 0.923        | 3468        | tags=18%, list=13%, sig |
| HALLMARK_INTERFERON_ALPHA_RESPONSE         | 95   | -0.39273  | -1.244748 | 0.11620795  | 0.16426632  | 0.967        | 4418        | tags=20%, list=17%, sig |
| HALLMARK_ANDROGEN_RESPONSE                 | 97   | -0.380451 | -1.212907 | 0.14285715  | 0.19757609  | 0.985        | 5264        | tags=21%, list=20%, sig |
| HALLMARK_PROTEIN_SECRETION                 | 96   | -0.371022 | -1.187122 | 0.17204301  | 0.23100984  | 0.994        | 4307        | tags=22%, list=16%, sig |
| HALLMARK_UNFOLDED_PROTEIN_RESPONSE         | 110  | -0.355734 | -1.149209 | 0.2185129   | 0.28581247  | 0.997        | 2230        | tags=10%, list=8%, sign |
| HALLMARK_HEME_METABOLISM                   | 180  | -0.328723 | -1.130226 | 0.2168331   | 0.31082824  | 0.999        | 5916        | tags=29%, list=22%, sig |
| HALLMARK_XENOBIOTIC_METABOLISM             | 190  | -0.321674 | -1.124744 | 0.19855073  | 0.30841008  | 0.999        | 3941        | tags=17%, list=15%, sig |
| HALLMARK_KRAS_SIGNALING_DN                 | 170  | -0.322385 | -1.096166 | 0.25637394  | 0.35064724  | 1            | 4137        | tags=24%, list=16%, sig |
| HALLMARK_ESTROGEN_RESPONSE_EARLY           | 197  | -0.298795 | -1.049508 | 0.35021707  | 0.4385567   | 1            | 5627        | tags=23%, list=21%, sig |
| HALLMARK_GLYCOLYSIS                        | 196  | -0.2988   | -1.036344 | 0.36219338  | 0.45062795  | 1            | 3275        | tags=16%, list=12%, sig |
| HALLMARK_APICAL_JUNCTION                   | 197  | -0.298921 | -1.03401  | 0.392022    | 0.43924826  | 1            | 5734        | tags=27%, list=22%, sig |
| HALLMARK_BILE_ACID_METABOLISM              | 103  | -0.31583  | -1.022427 | 0.41097924  | 0.45043015  | 1            | 5617        | tags=24%, list=21%, sig |
| HALLMARK_TGF_BETA_SIGNALING                | 53   | -0.296927 | -0.855525 | 0.6930693   | 0.83178765  | 1            | 6869        | tags=25%, list=26%, sig |
| HALLMARK_HEDGEHOG_SIGNALING                | 35   | -0.305406 | -0.823129 | 0.74429965  | 0.8723356   | 1            | 7394        | tags=43%, list=26%, sig |
| HALLMARK_PI3K_AKT_MTOR_SIGNALING           | 102  | -0.250278 | -0.808546 | 0.8445122   | 0.8709158   | 1            | 3406        | tags=13%, list=13%, sig |

**Table S25**  
**Cox proportional hazards model for OCFs of the indicated parameters in Real-World Evidence Cohort**

| Plot Title                  | HR    | HR_95CI LowerBound | HR_95CI UpperBound | p-value | arm2_name   | arm1_name      | arm2_n | arm1_n | arm2_median_weeks | arm1_median_weeks |
|-----------------------------|-------|--------------------|--------------------|---------|-------------|----------------|--------|--------|-------------------|-------------------|
| 3p - IO                     | 0.781 | 0.410              | 1.489              | 0.449   | Loss        | No Loss        | 35     | 87     | 43                | 79                |
| 3p - non-IO                 | 0.506 | 0.239              | 1.070              | 0.069   | Loss        | No Loss        | 15     | 59     | 67                | 86                |
| 17p - IO                    | 1.074 | 0.426              | 2.712              | 0.881   | Loss        | No Loss        | 11     | 111    | 48                | 79                |
| 17p - non-IO*               |       |                    |                    |         | Loss        | No Loss        | 2      | 72     | 6                 | 72                |
| 9p - IO                     | 0.468 | 0.232              | 0.944              | 0.030   | Loss        | No Loss        | 19     | 103    | 43                | 79                |
| 9p - non-IO                 | 0.988 | 0.397              | 2.457              | 0.980   | Loss        | No Loss        | 12     | 62     | 83                | 67                |
| 9p13 - IO                   | 0.636 | 0.342              | 1.183              | 0.150   | Loss        | No Loss        | 29     | 93     | 79                | 53                |
| 9p13 - non-IO               | 1.020 | 0.468              | 2.224              | 0.960   | Loss        | No Loss        | 19     | 55     | 174               | 67                |
| 9p21.3 - IO                 | 0.907 | 0.514              | 1.603              | 0.738   | Loss        | No Loss        | 45     | 77     | 50                | 80                |
| 9p21.3 - non-IO             | 1.168 | 0.558              | 2.444              | 0.681   | Loss        | No Loss        | 26     | 48     | 83                | 49                |
| 9p24.1 - IO                 | 0.482 | 0.249              | 0.934              | 0.028   | Loss        | No Loss        | 24     | 98     | 43                | 79                |
| 9p24.1 - non-IO             | 0.986 | 0.439              | 2.218              | 0.973   | Loss        | No Loss        | 17     | 57     | 83                | 67                |
| PDL1 - IO                   | 0.594 | 0.336              | 1.050              | 0.071   | Deletion    | No Deletion    | 37     | 85     | 43                | 79                |
| PDL1 - non-IO               | 0.752 | 0.361              | 1.568              | 0.446   | Deletion    | No Deletion    | 21     | 53     | 83                | 67                |
| PDL2 - IO                   | 0.582 | 0.321              | 1.055              | 0.072   | Deletion    | No Deletion    | 32     | 90     | 43                | 79                |
| PDL2 - non-IO               | 0.649 | 0.311              | 1.353              | 0.245   | Deletion    | No Deletion    | 20     | 54     | 72                | 69                |
| JAK2 - IO                   | 0.580 | 0.313              | 1.074              | 0.081   | Deletion    | No Deletion    | 33     | 89     | 43                | 79                |
| JAK2 - non-IO               | 0.715 | 0.348              | 1.466              | 0.358   | Deletion    | No Deletion    | 24     | 50     | 72                | 69                |
| PDL1, JAK2 - IO             | 0.436 | 0.235              | 0.810              | 0.007   | Co-Deletion | No Co-Deletion | 29     | 93     | 27                | 80                |
| PDL1, JAK2 - non-IO         | 0.979 | 0.450              | 2.133              | 0.958   | Co-Deletion | No Co-Deletion | 19     | 55     | 83                | 67                |
| PDL2, JAK2 - IO             | 0.473 | 0.252              | 0.888              | 0.018   | Co-Deletion | No Co-Deletion | 28     | 94     | 43                | 79                |
| PDL2, JAK2 - non-IO         | 0.843 | 0.387              | 1.838              | 0.667   | Co-Deletion | No Co-Deletion | 18     | 56     | 83                | 67                |
| PDL1, PDL2 - IO             | 0.554 | 0.306              | 1.006              | 0.050   | Co-Deletion | No Co-Deletion | 31     | 91     | 43                | 79                |
| PDL1, PDL2 - non-IO         | 0.649 | 0.311              | 1.353              | 0.245   | Co-Deletion | No Co-Deletion | 20     | 54     | 72                | 69                |
| PDL1, PDL2, JAK2 - IO**     | 0.473 | 0.252              | 0.888              | 0.018   | Co-Deletion | No Co-Deletion | 28     | 94     | 43                | 79                |
| PDL1, PDL2, JAK2 - non-IO** | 0.843 | 0.387              | 1.838              | 0.667   | Co-Deletion | No Co-Deletion | 18     | 56     | 83                | 67                |

\*Insufficient n in the No Loss arm to perform hazard ratio calculations

\*\*For the 32 PDL2 deletions, PDL1 was always co-deleted resulting in identical numbers in the PDL2, JAK2 and the PDL2, PDL2, JAK2 cohorts. PDL1 was deleted 5 times without PDL2 being co-deleted.
